# Supplementary material for: Isolation and In Silico Anti-COVID-19 Main Protease (Mpro) Activities of Flavonoids and a Sesquiterpene Lactone from Artemisia sublessingiana
Source: Hindawi journal article supplement (doi:10.1155/2021/5547013), 2021-05-22

Rosa151\_choloro  
single\_pulse

Compound-1-Prptpn

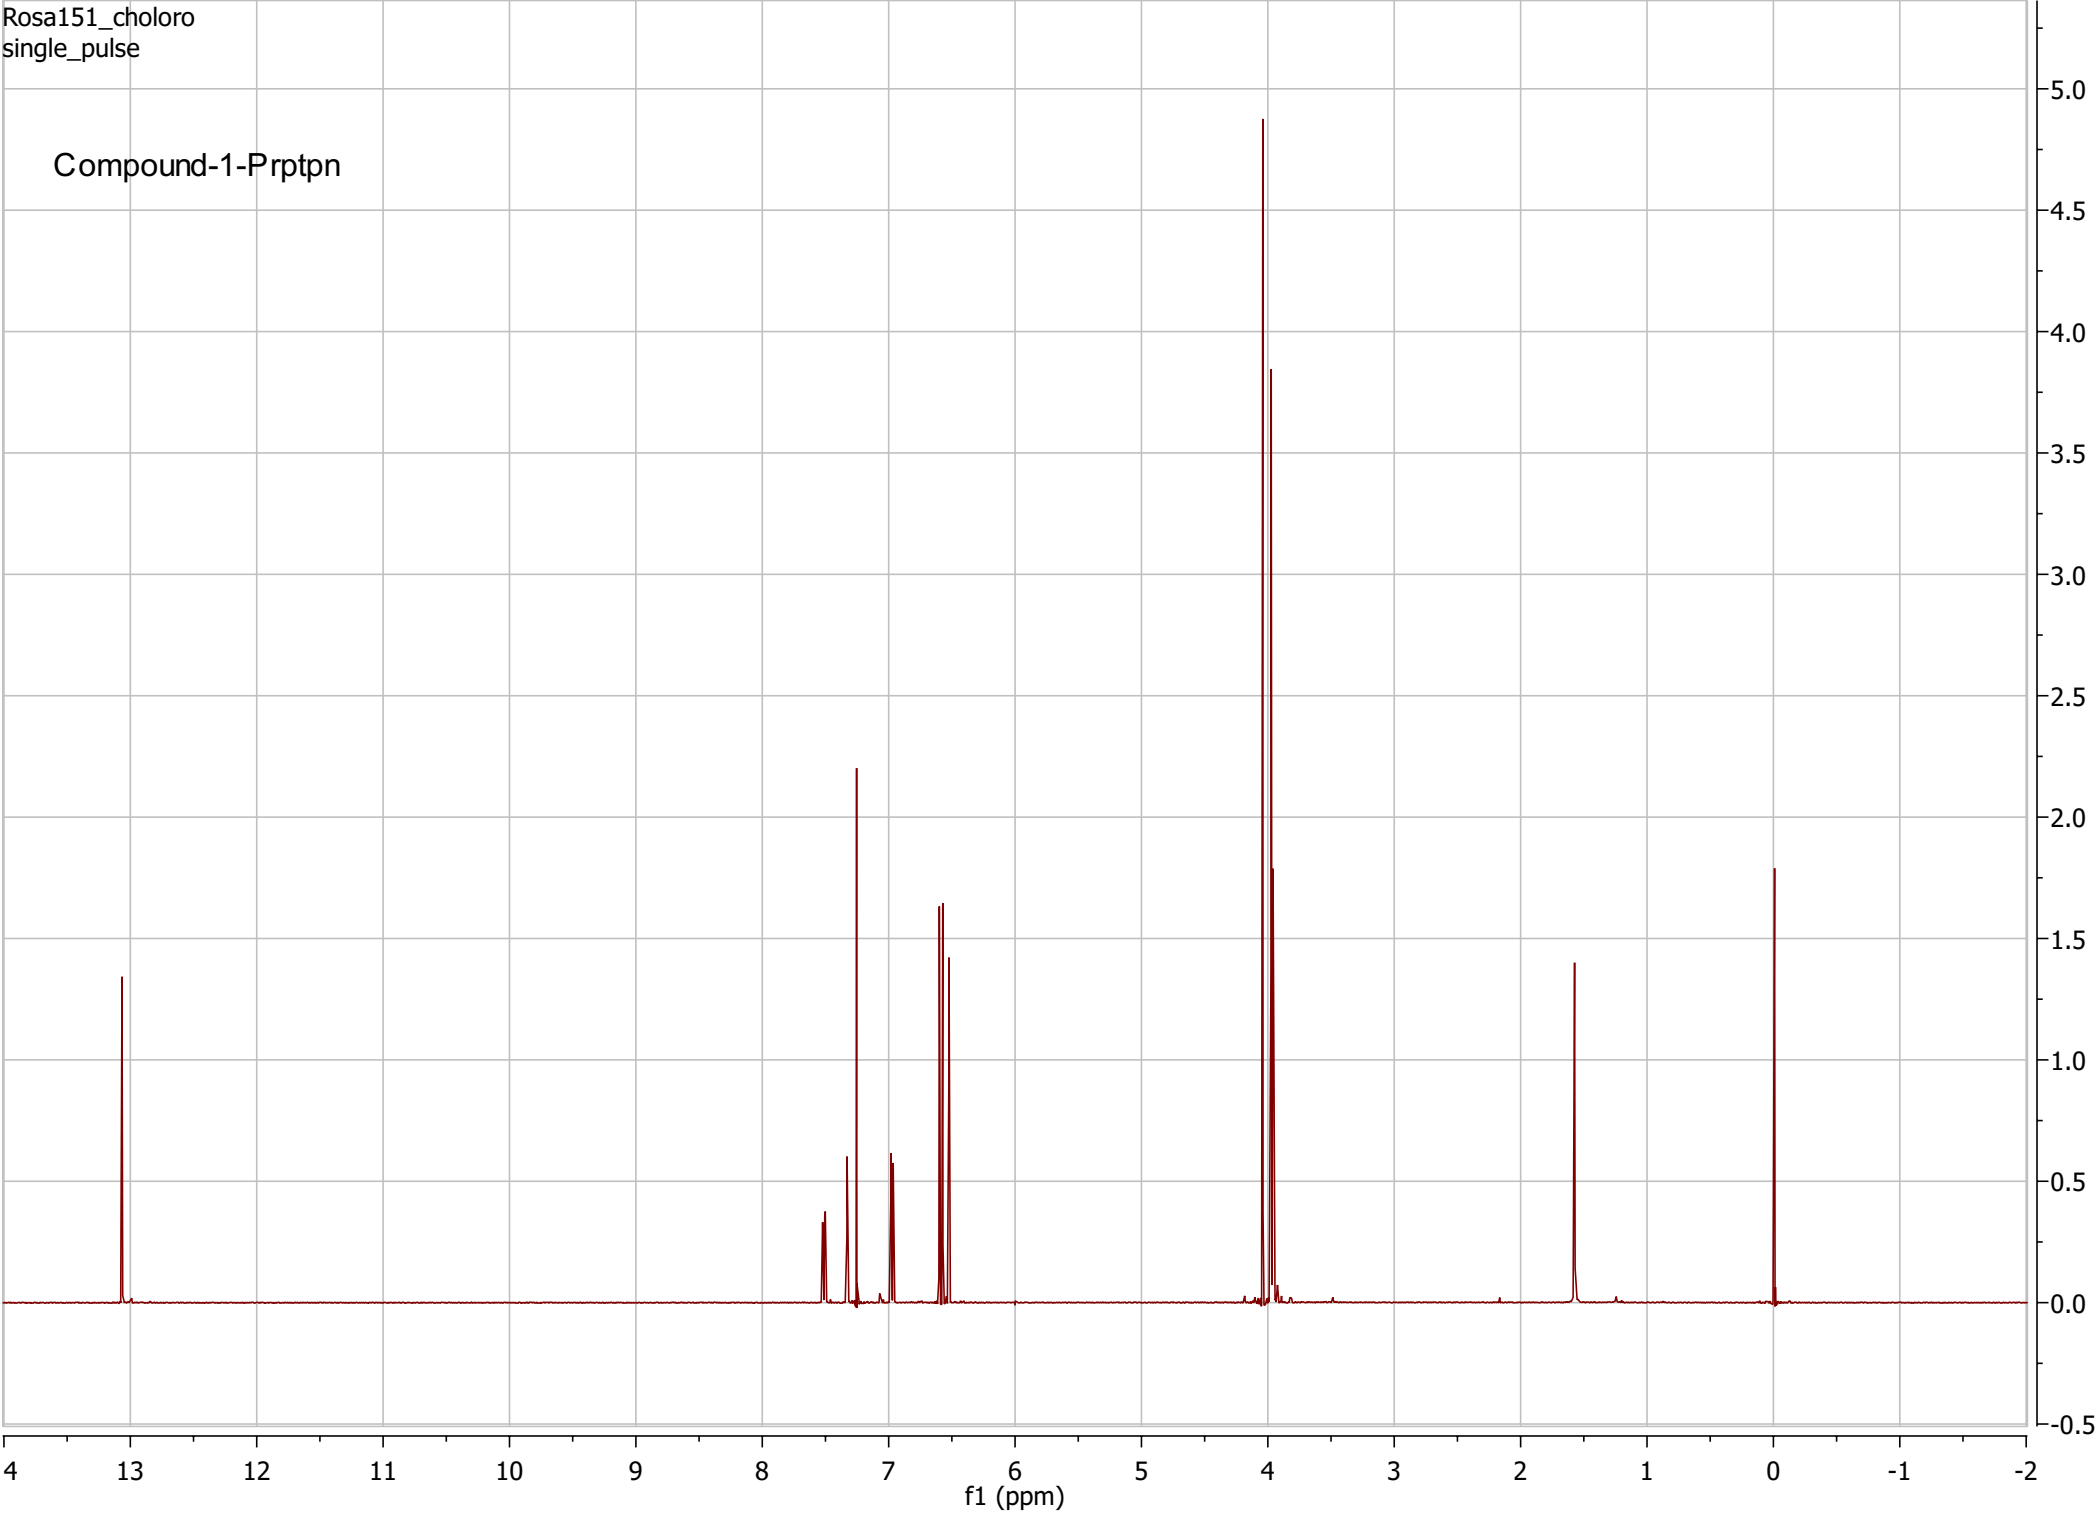

Rosa151\_choloro  
single\_pulse

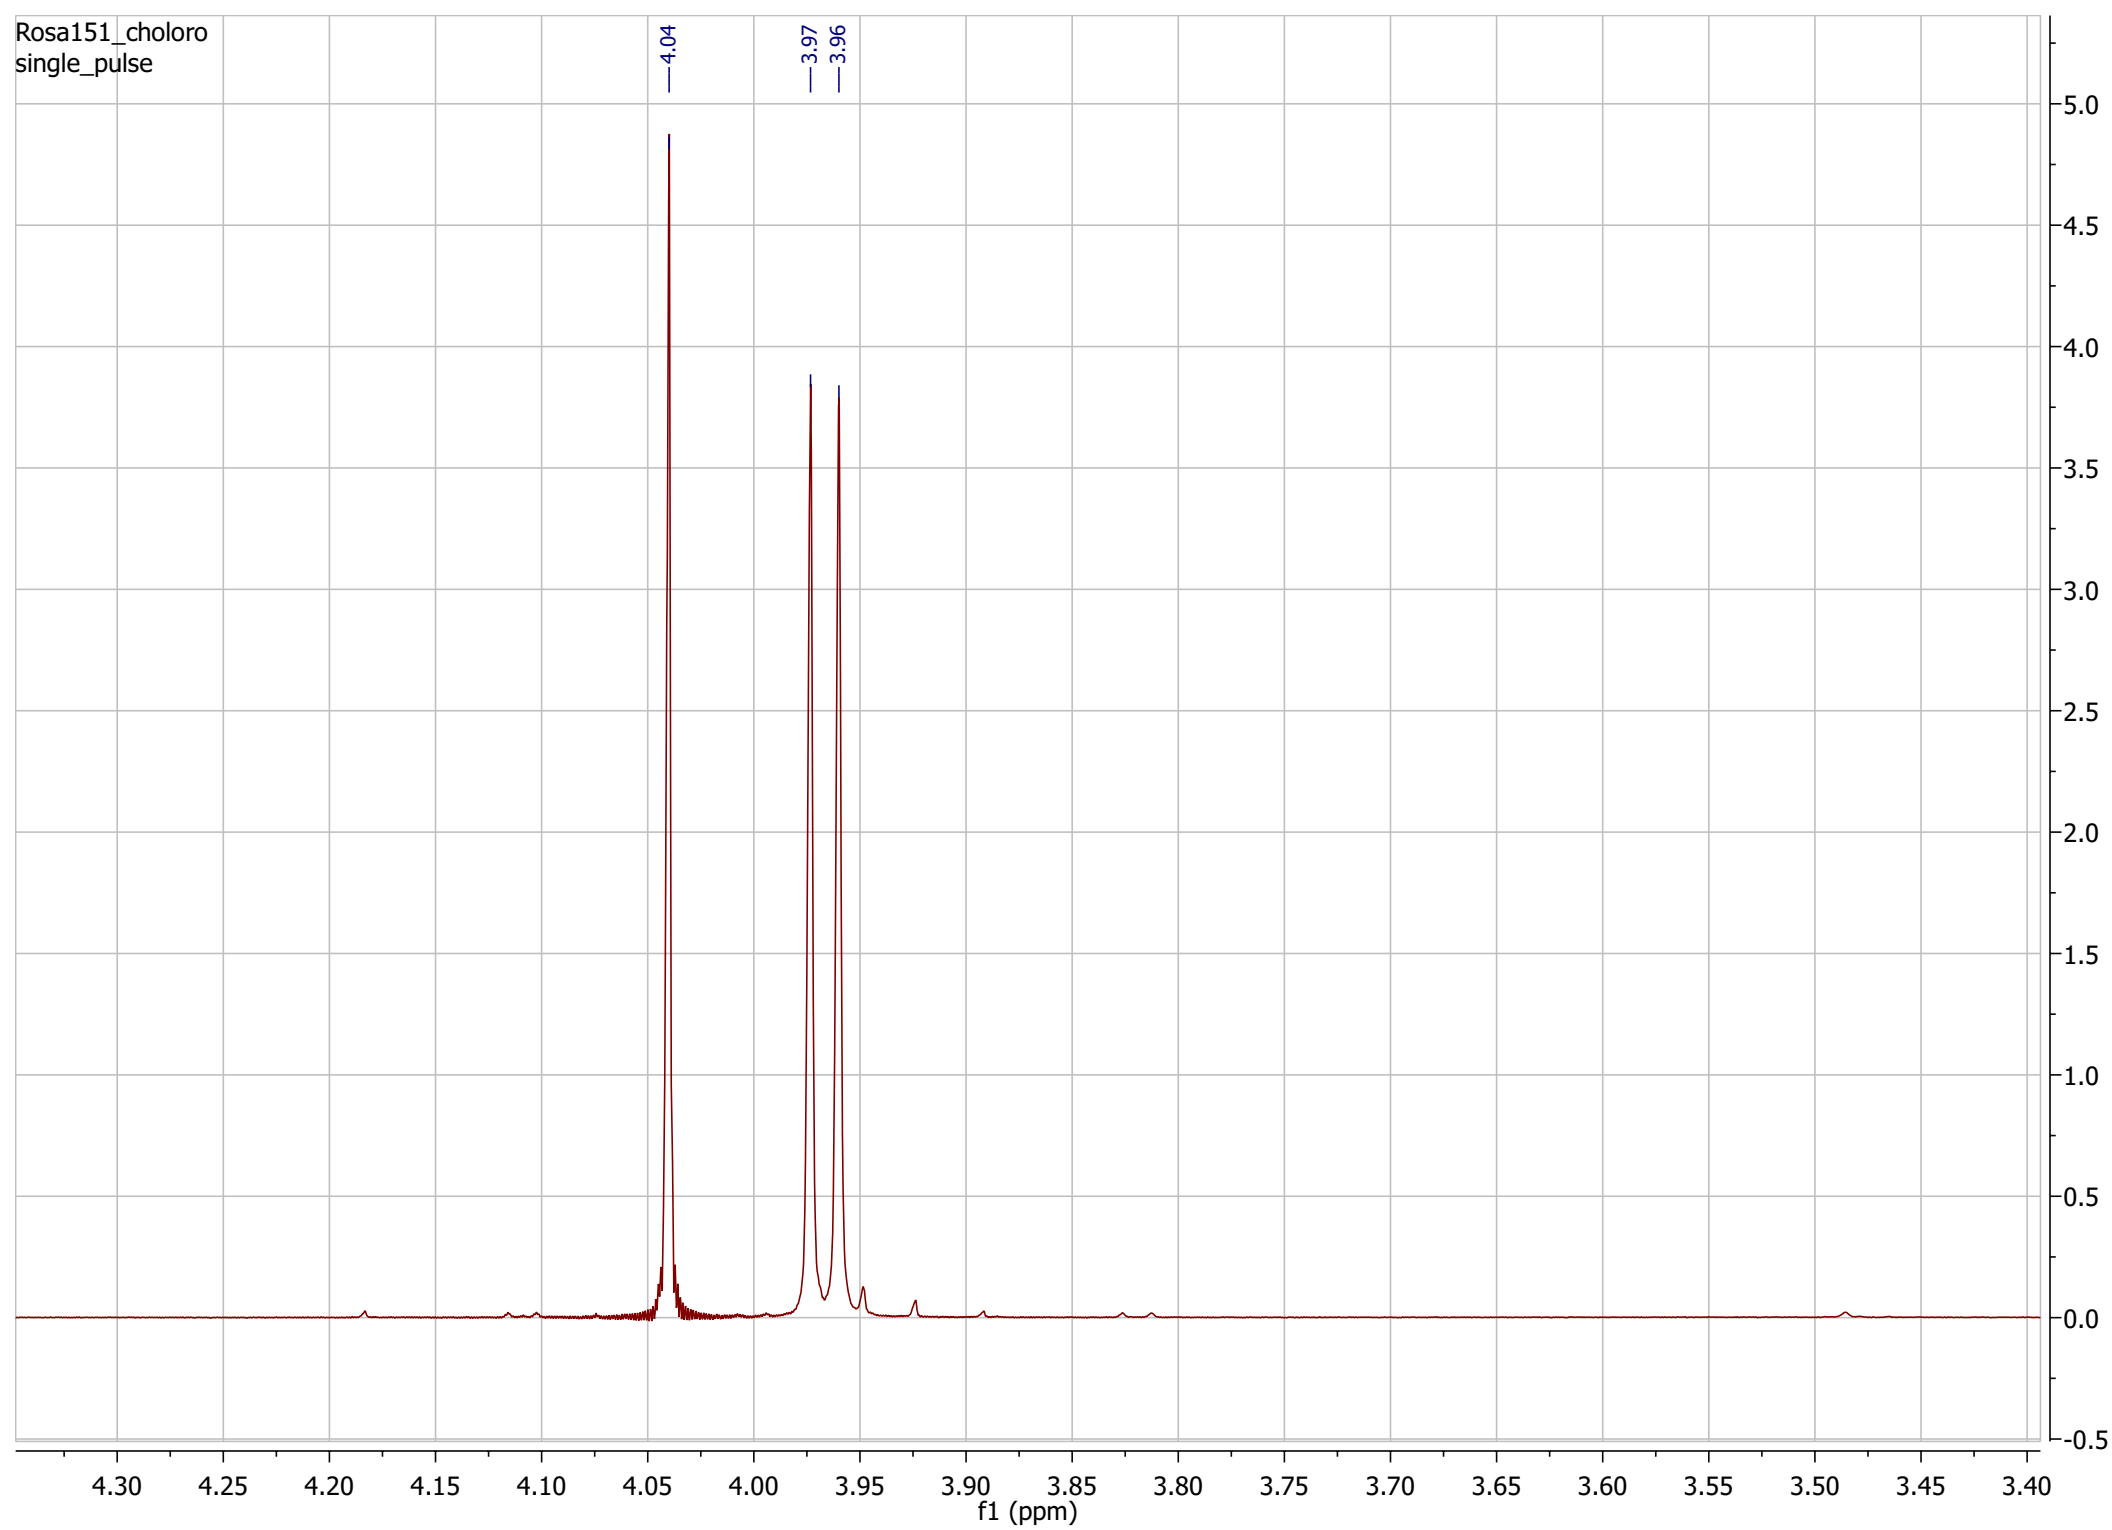

Rosa151\_choloro  
single\_pulse

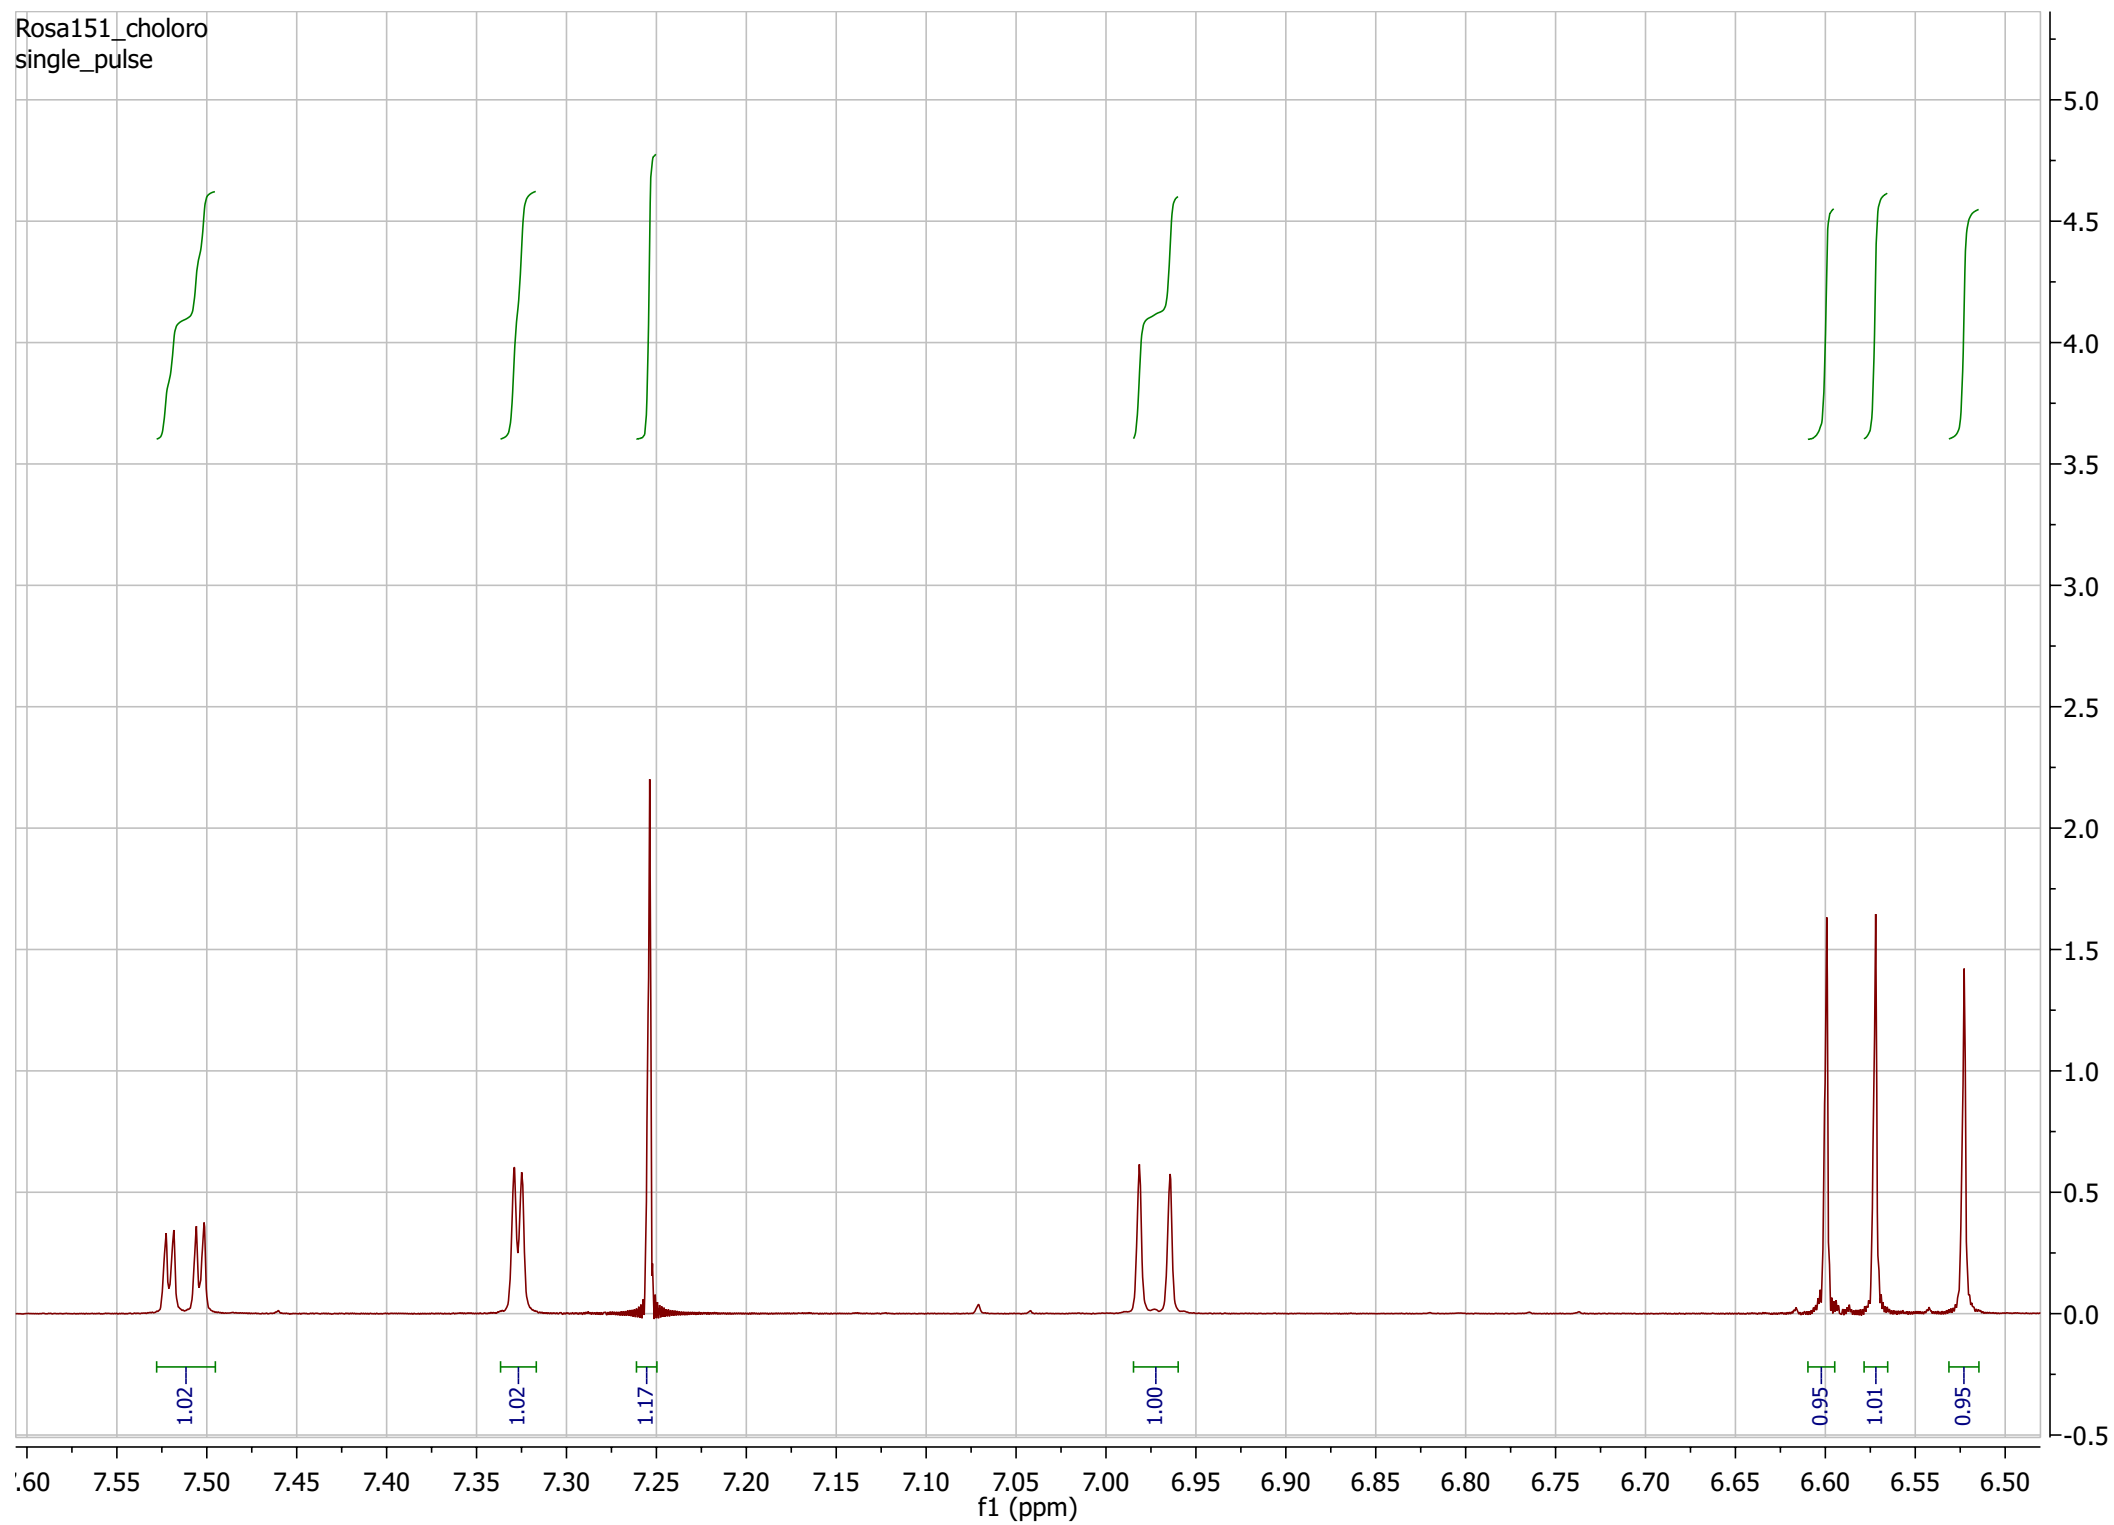

Rosa151\_choloro  
single\_pulse

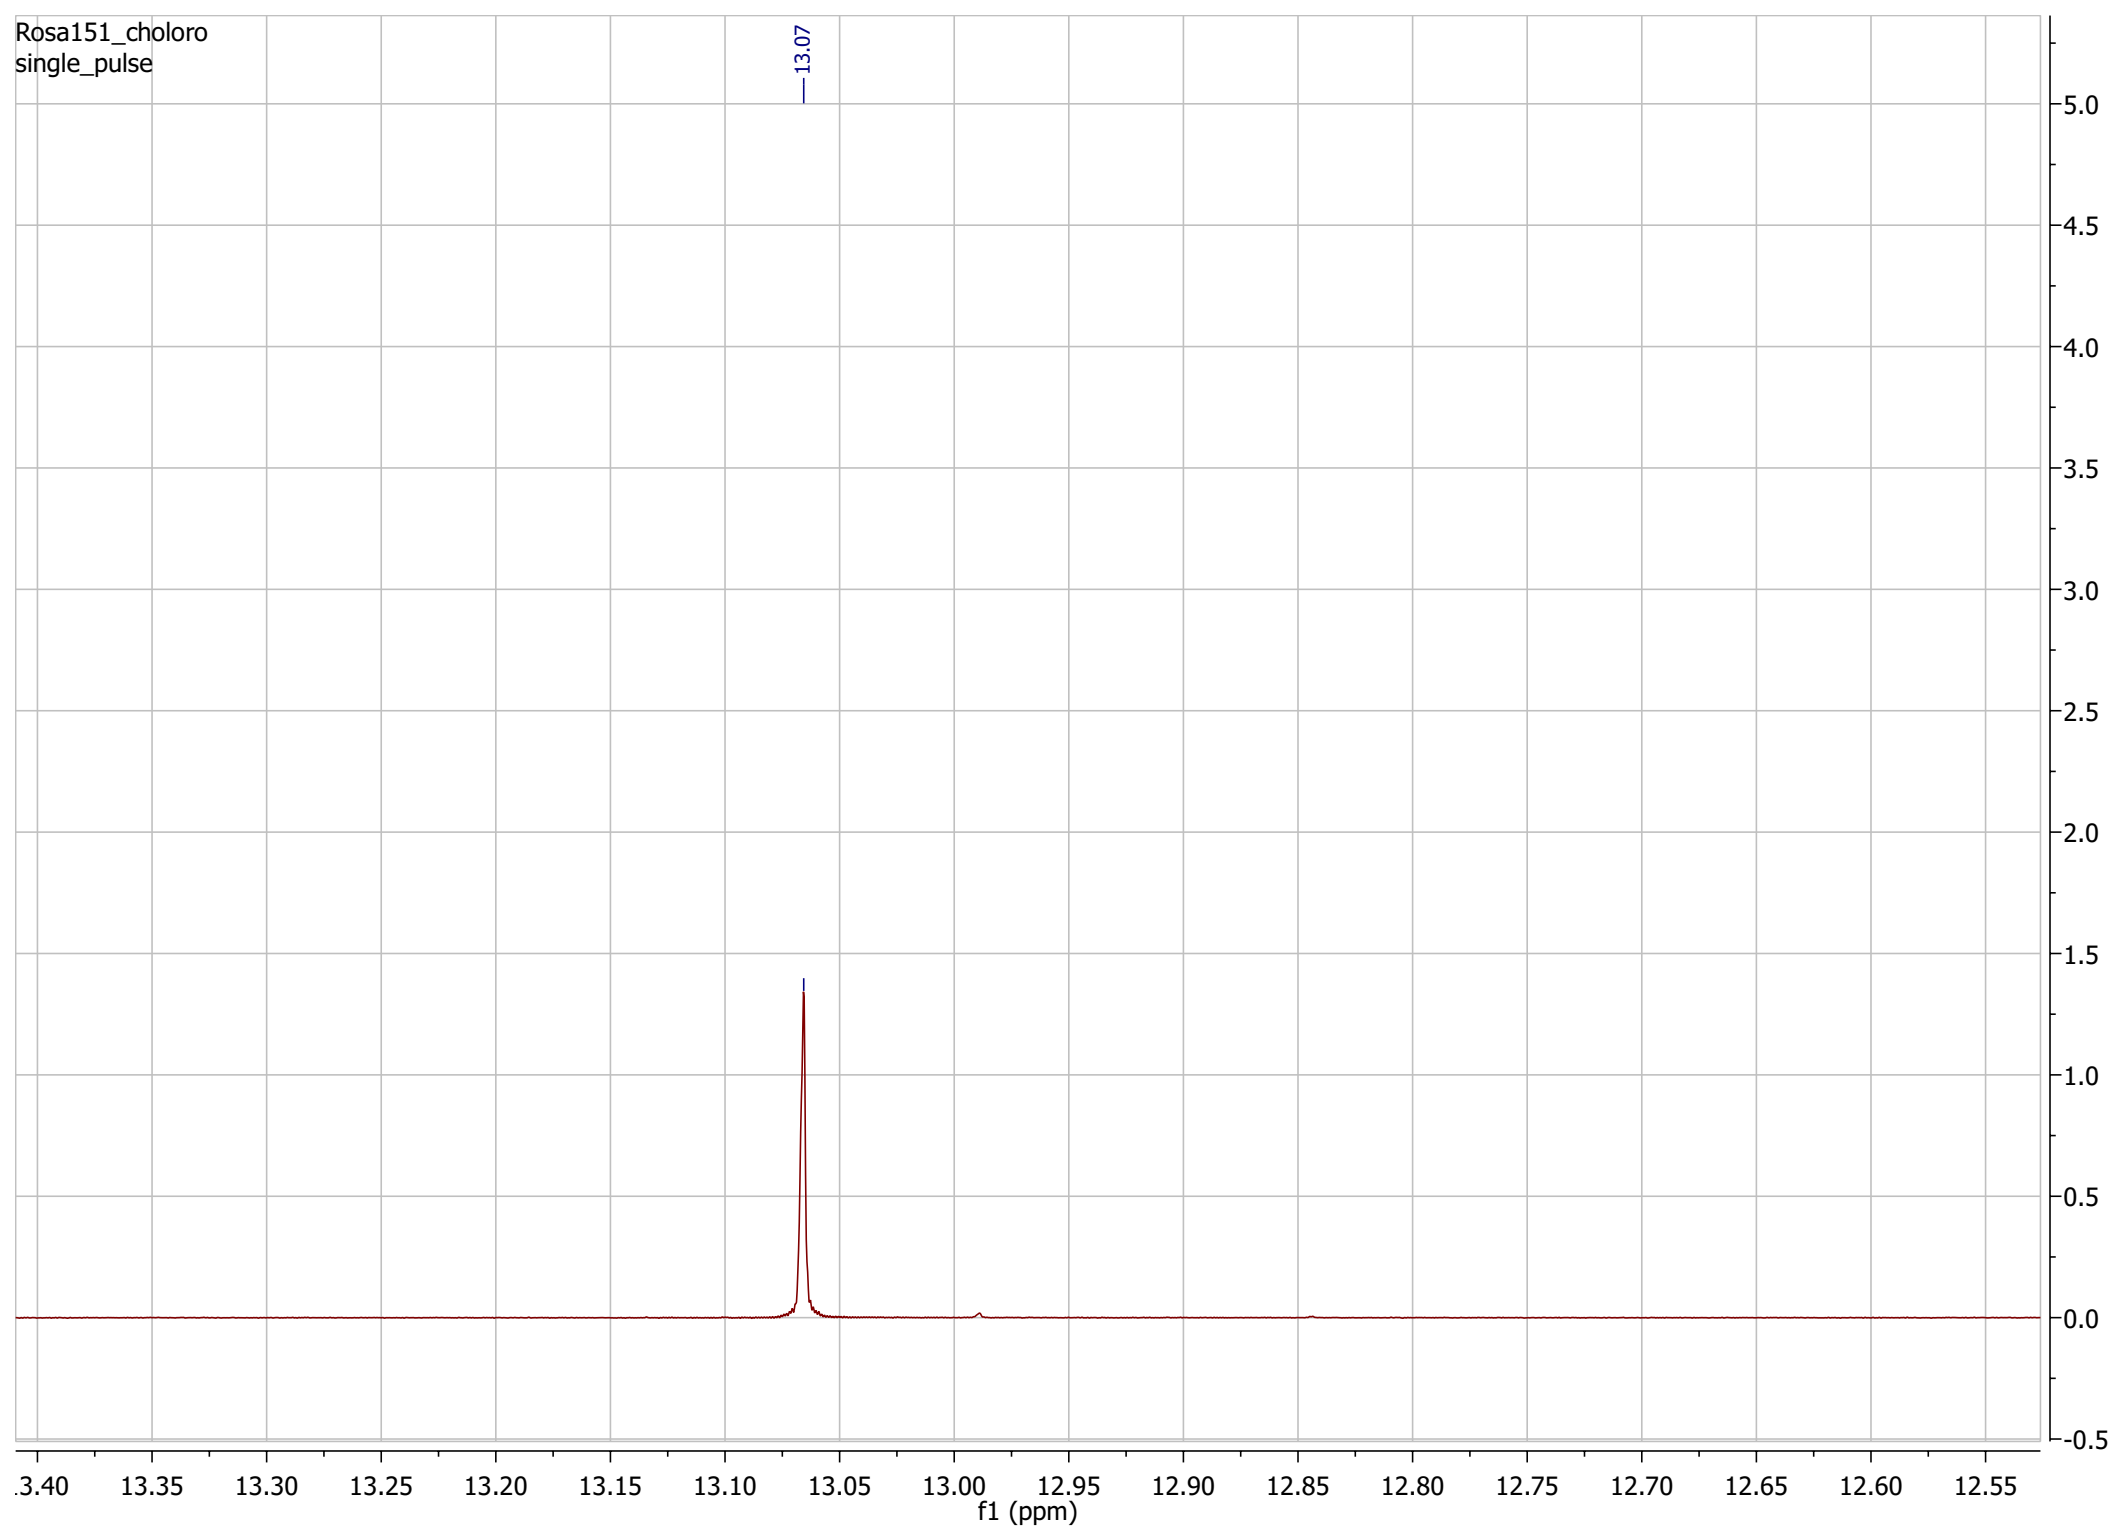

20191129-Rosa-151  
single pulse decoupled gated NOE

Compound-1-carbon

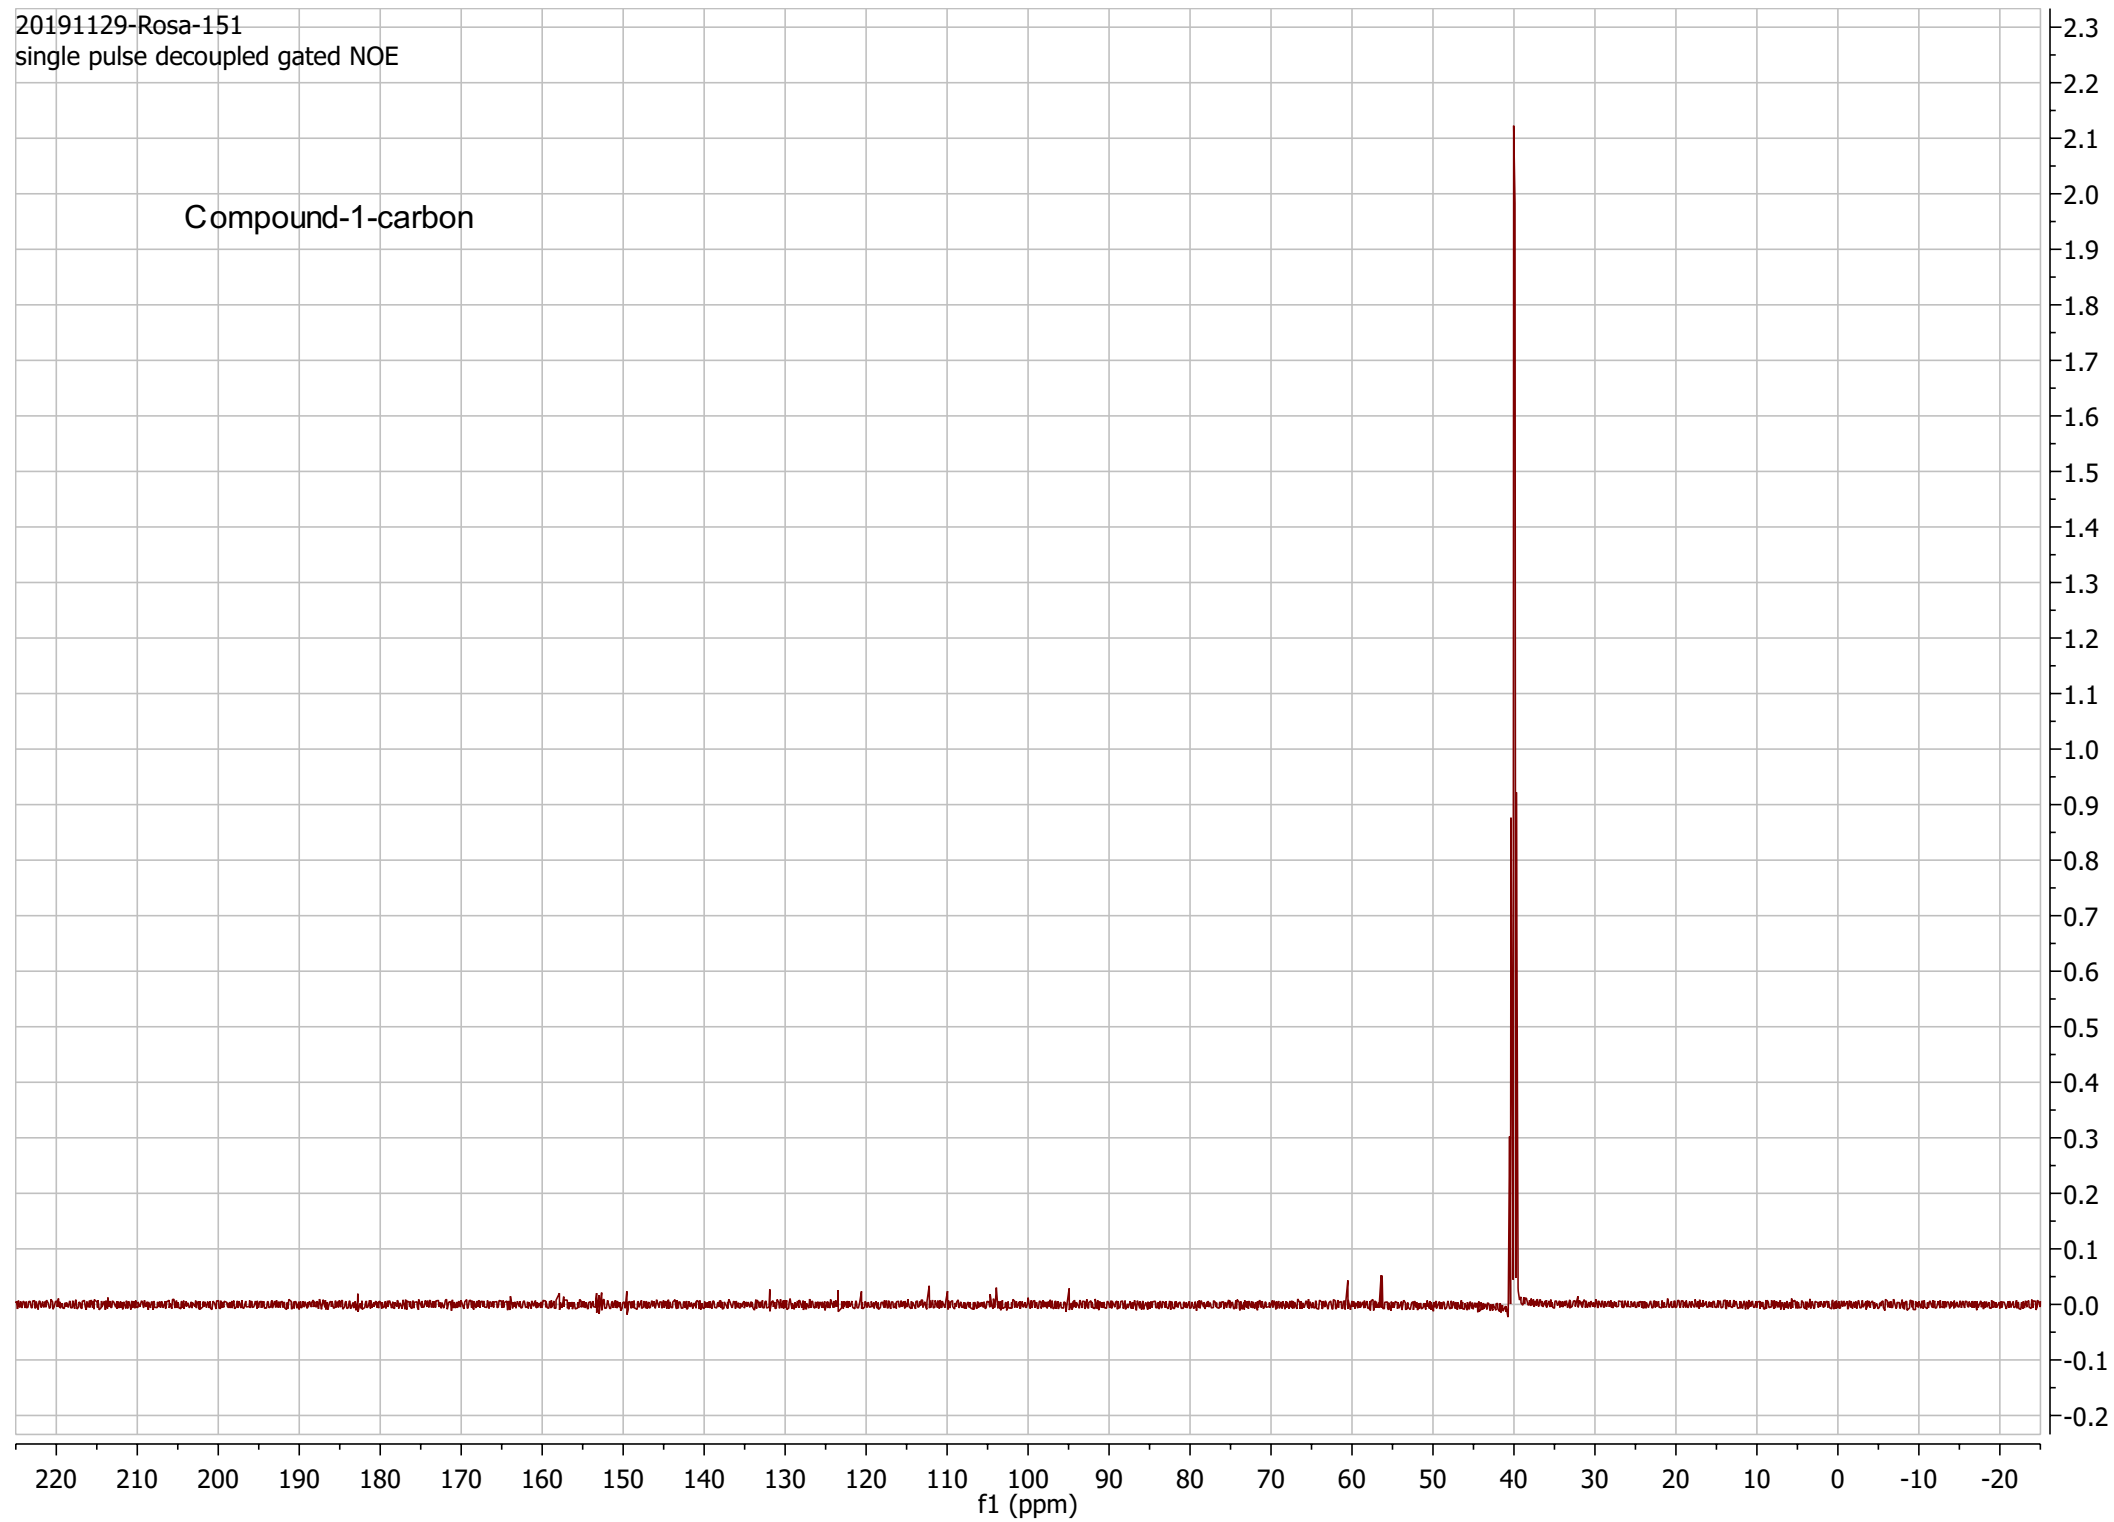

20191129-Rosa-151  
single pulse decoupled gated NOE

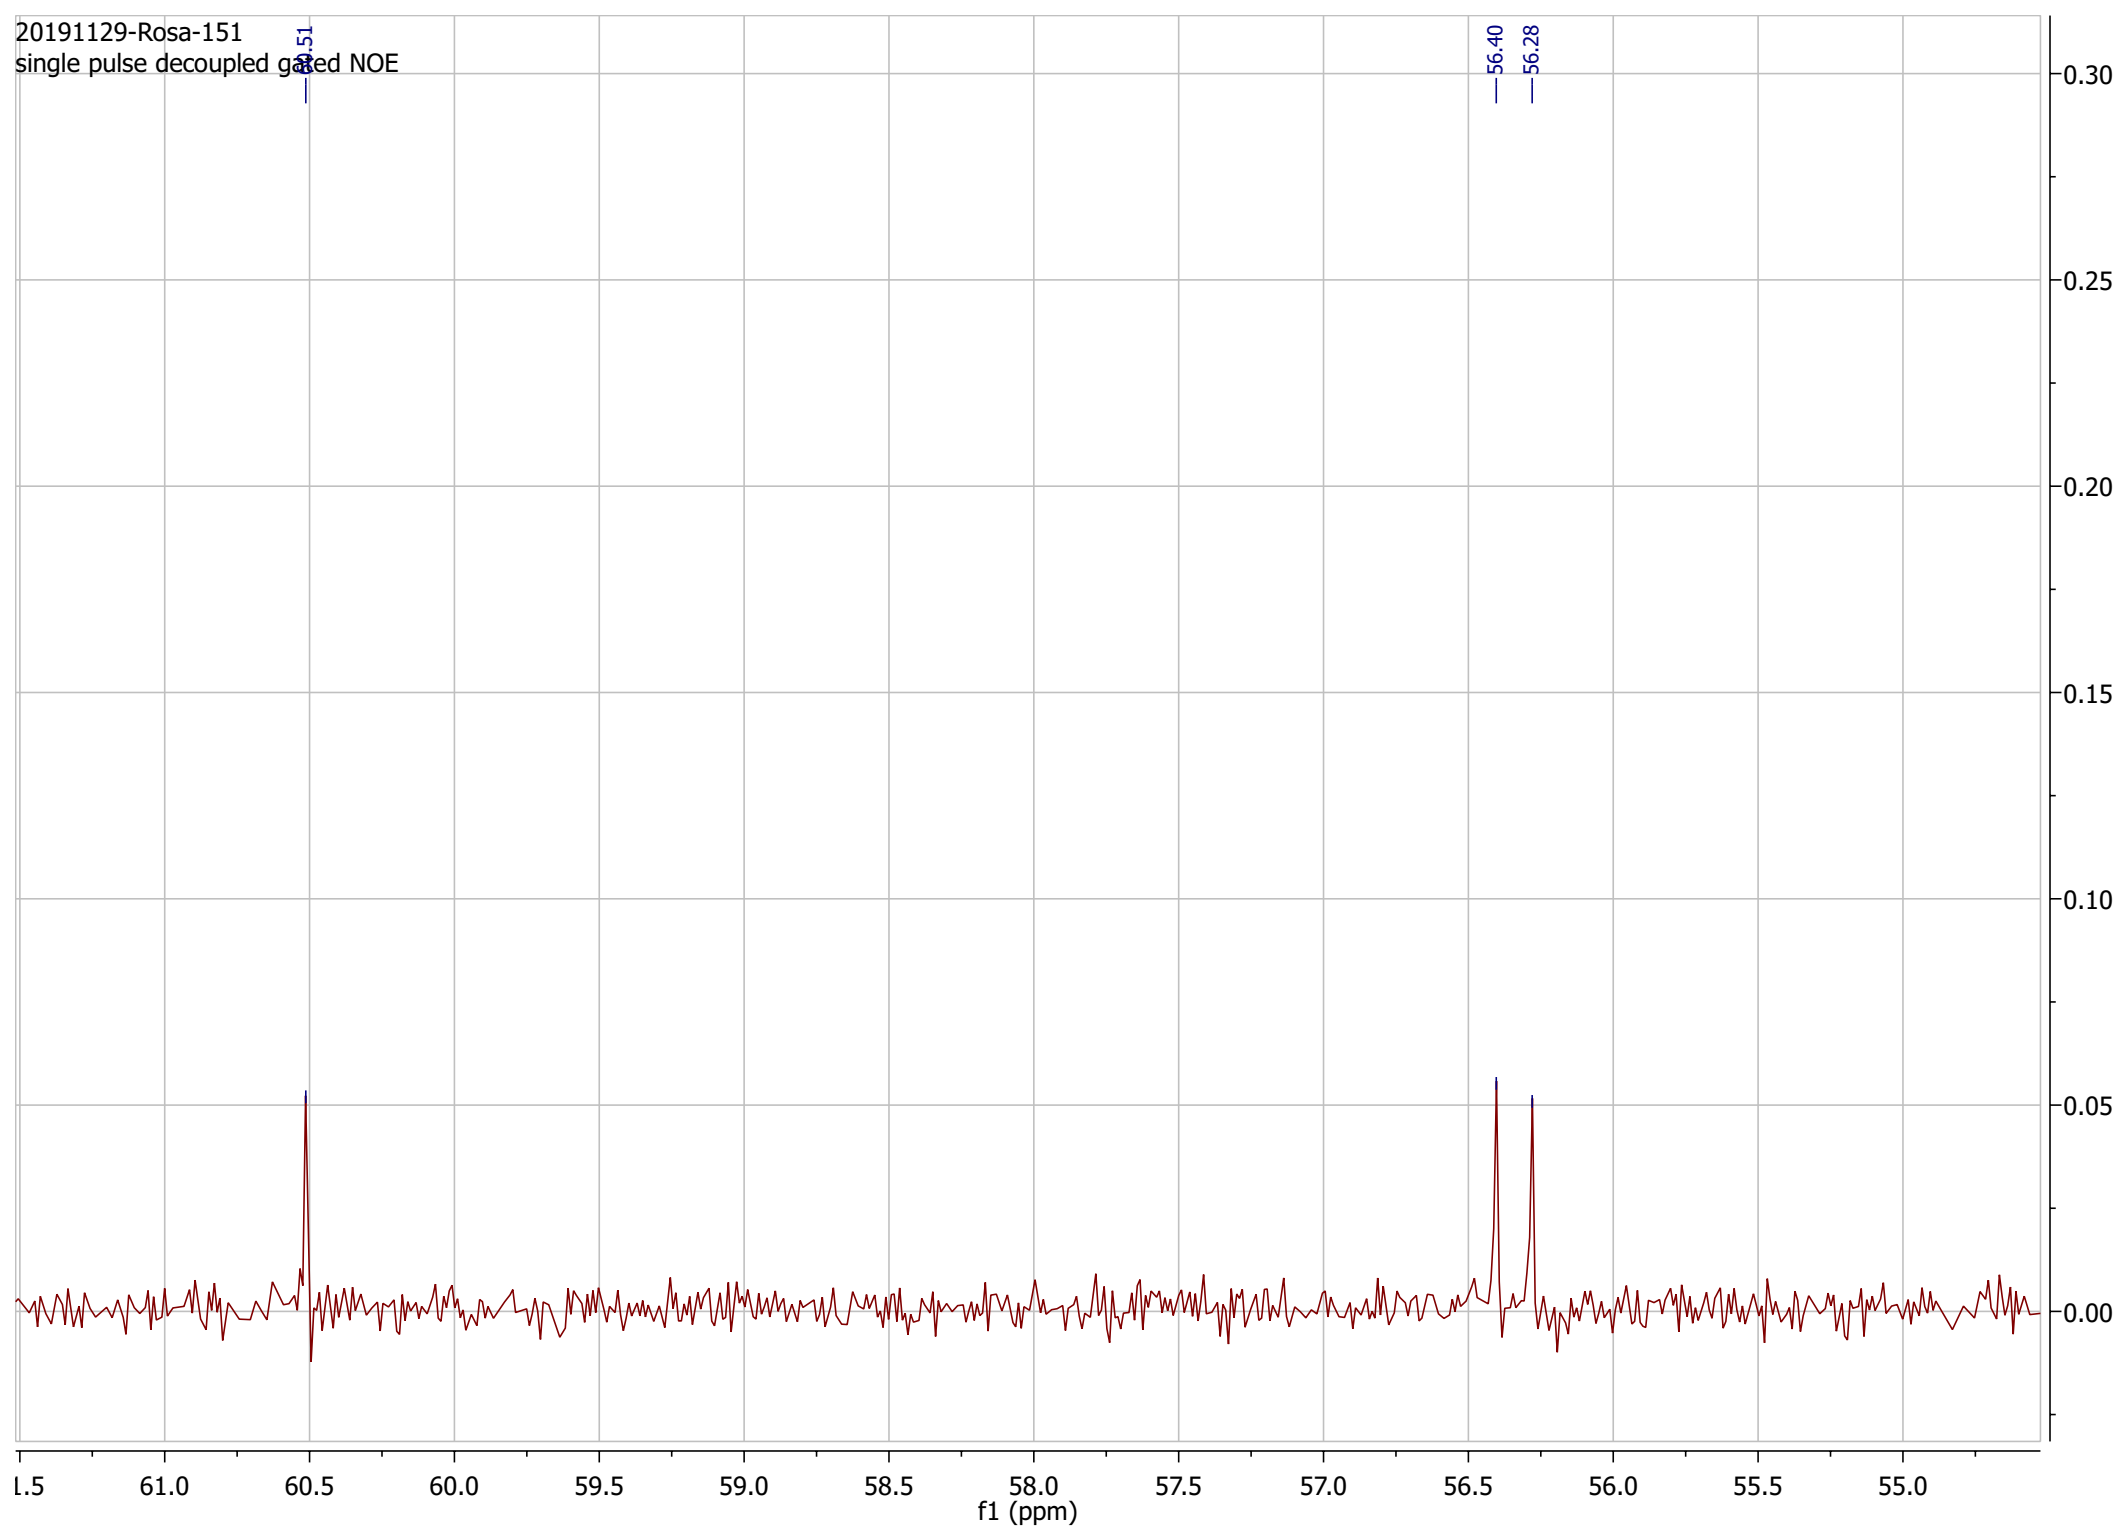

20191129-Rosa-151  
single pulse decoupled gated NOE

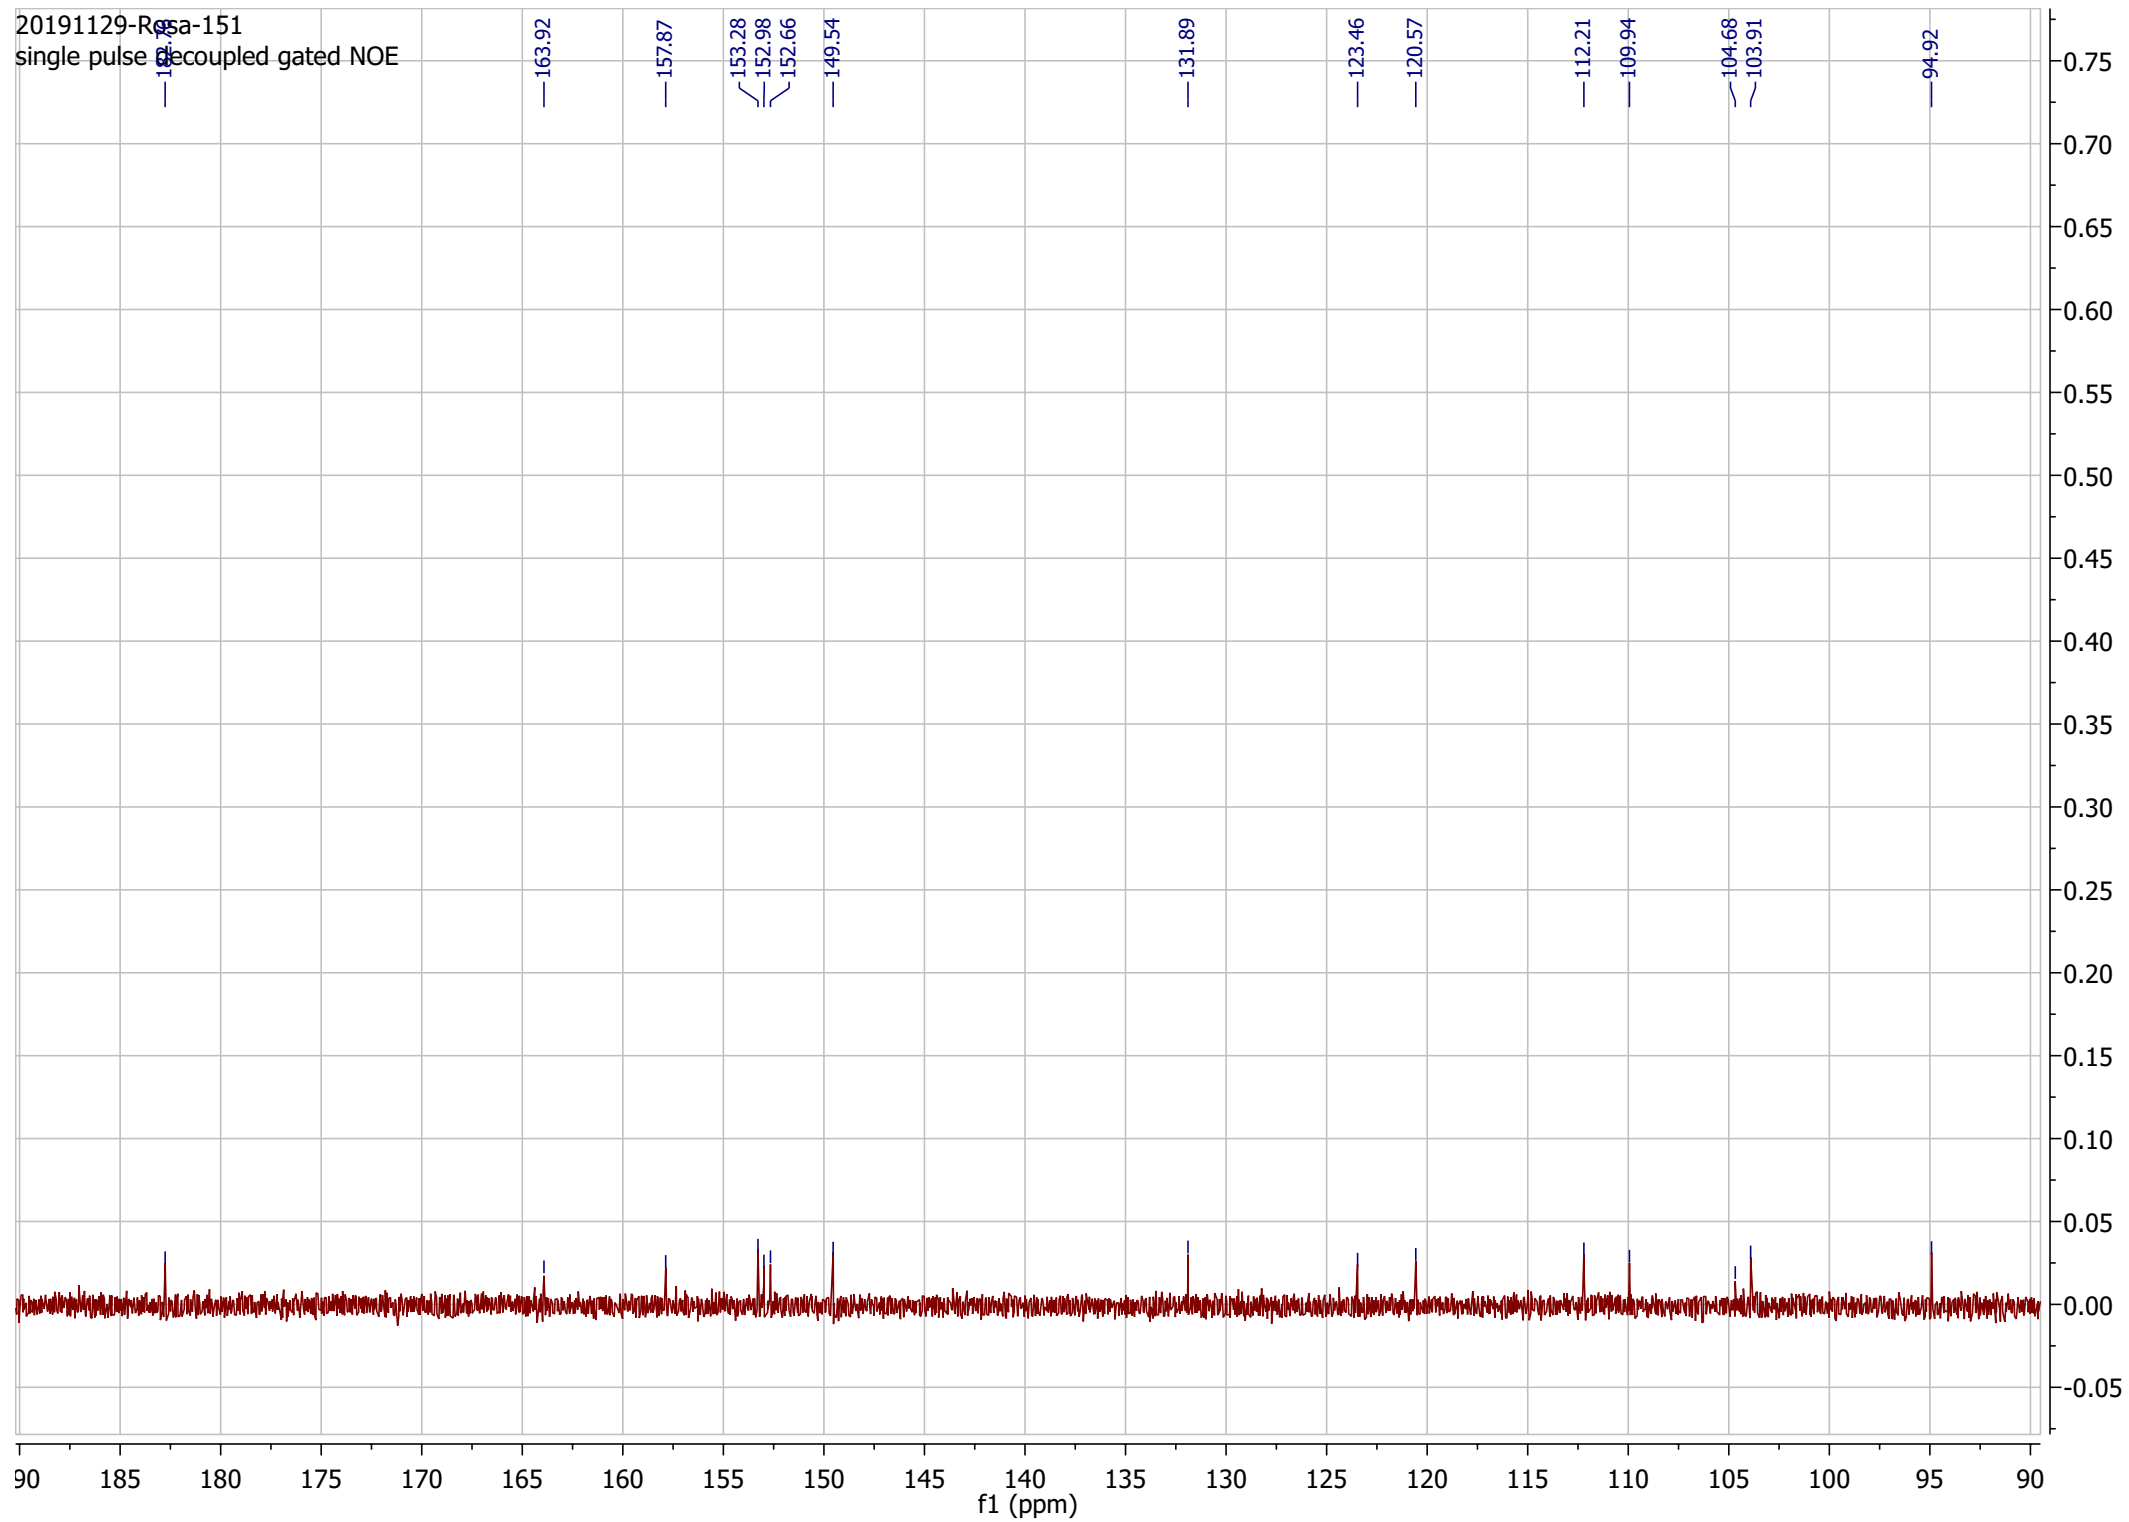

20191003\_RS-28-34  
single\_pulse

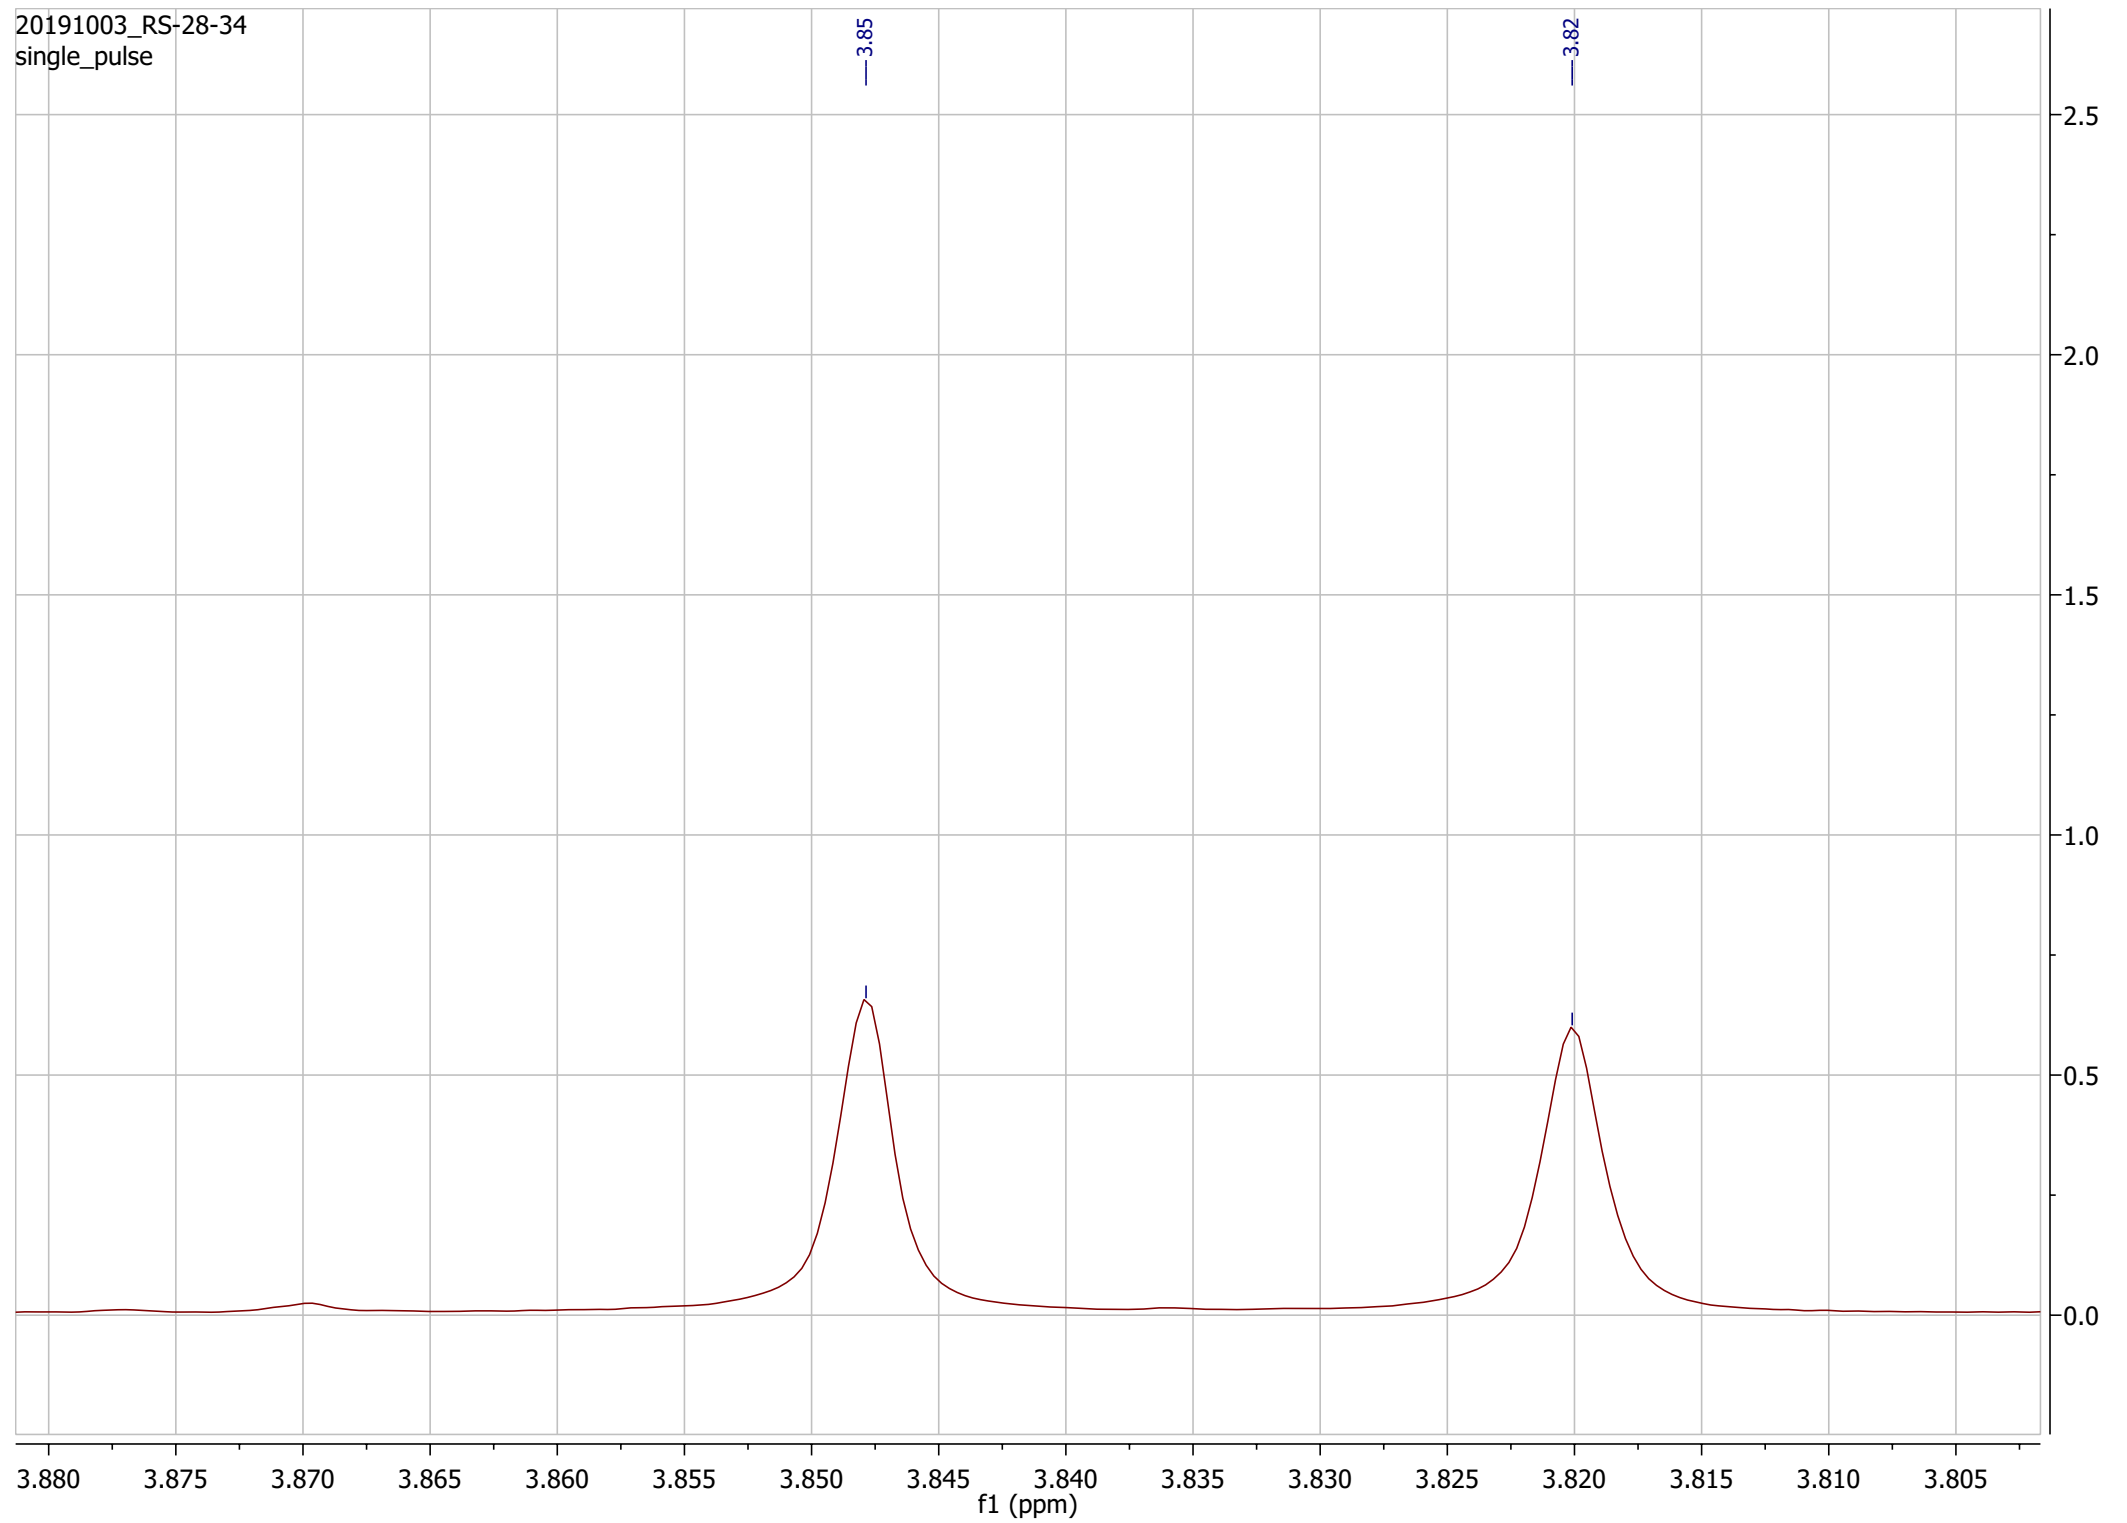



20191003\_RS-28-34  
single\_pulse

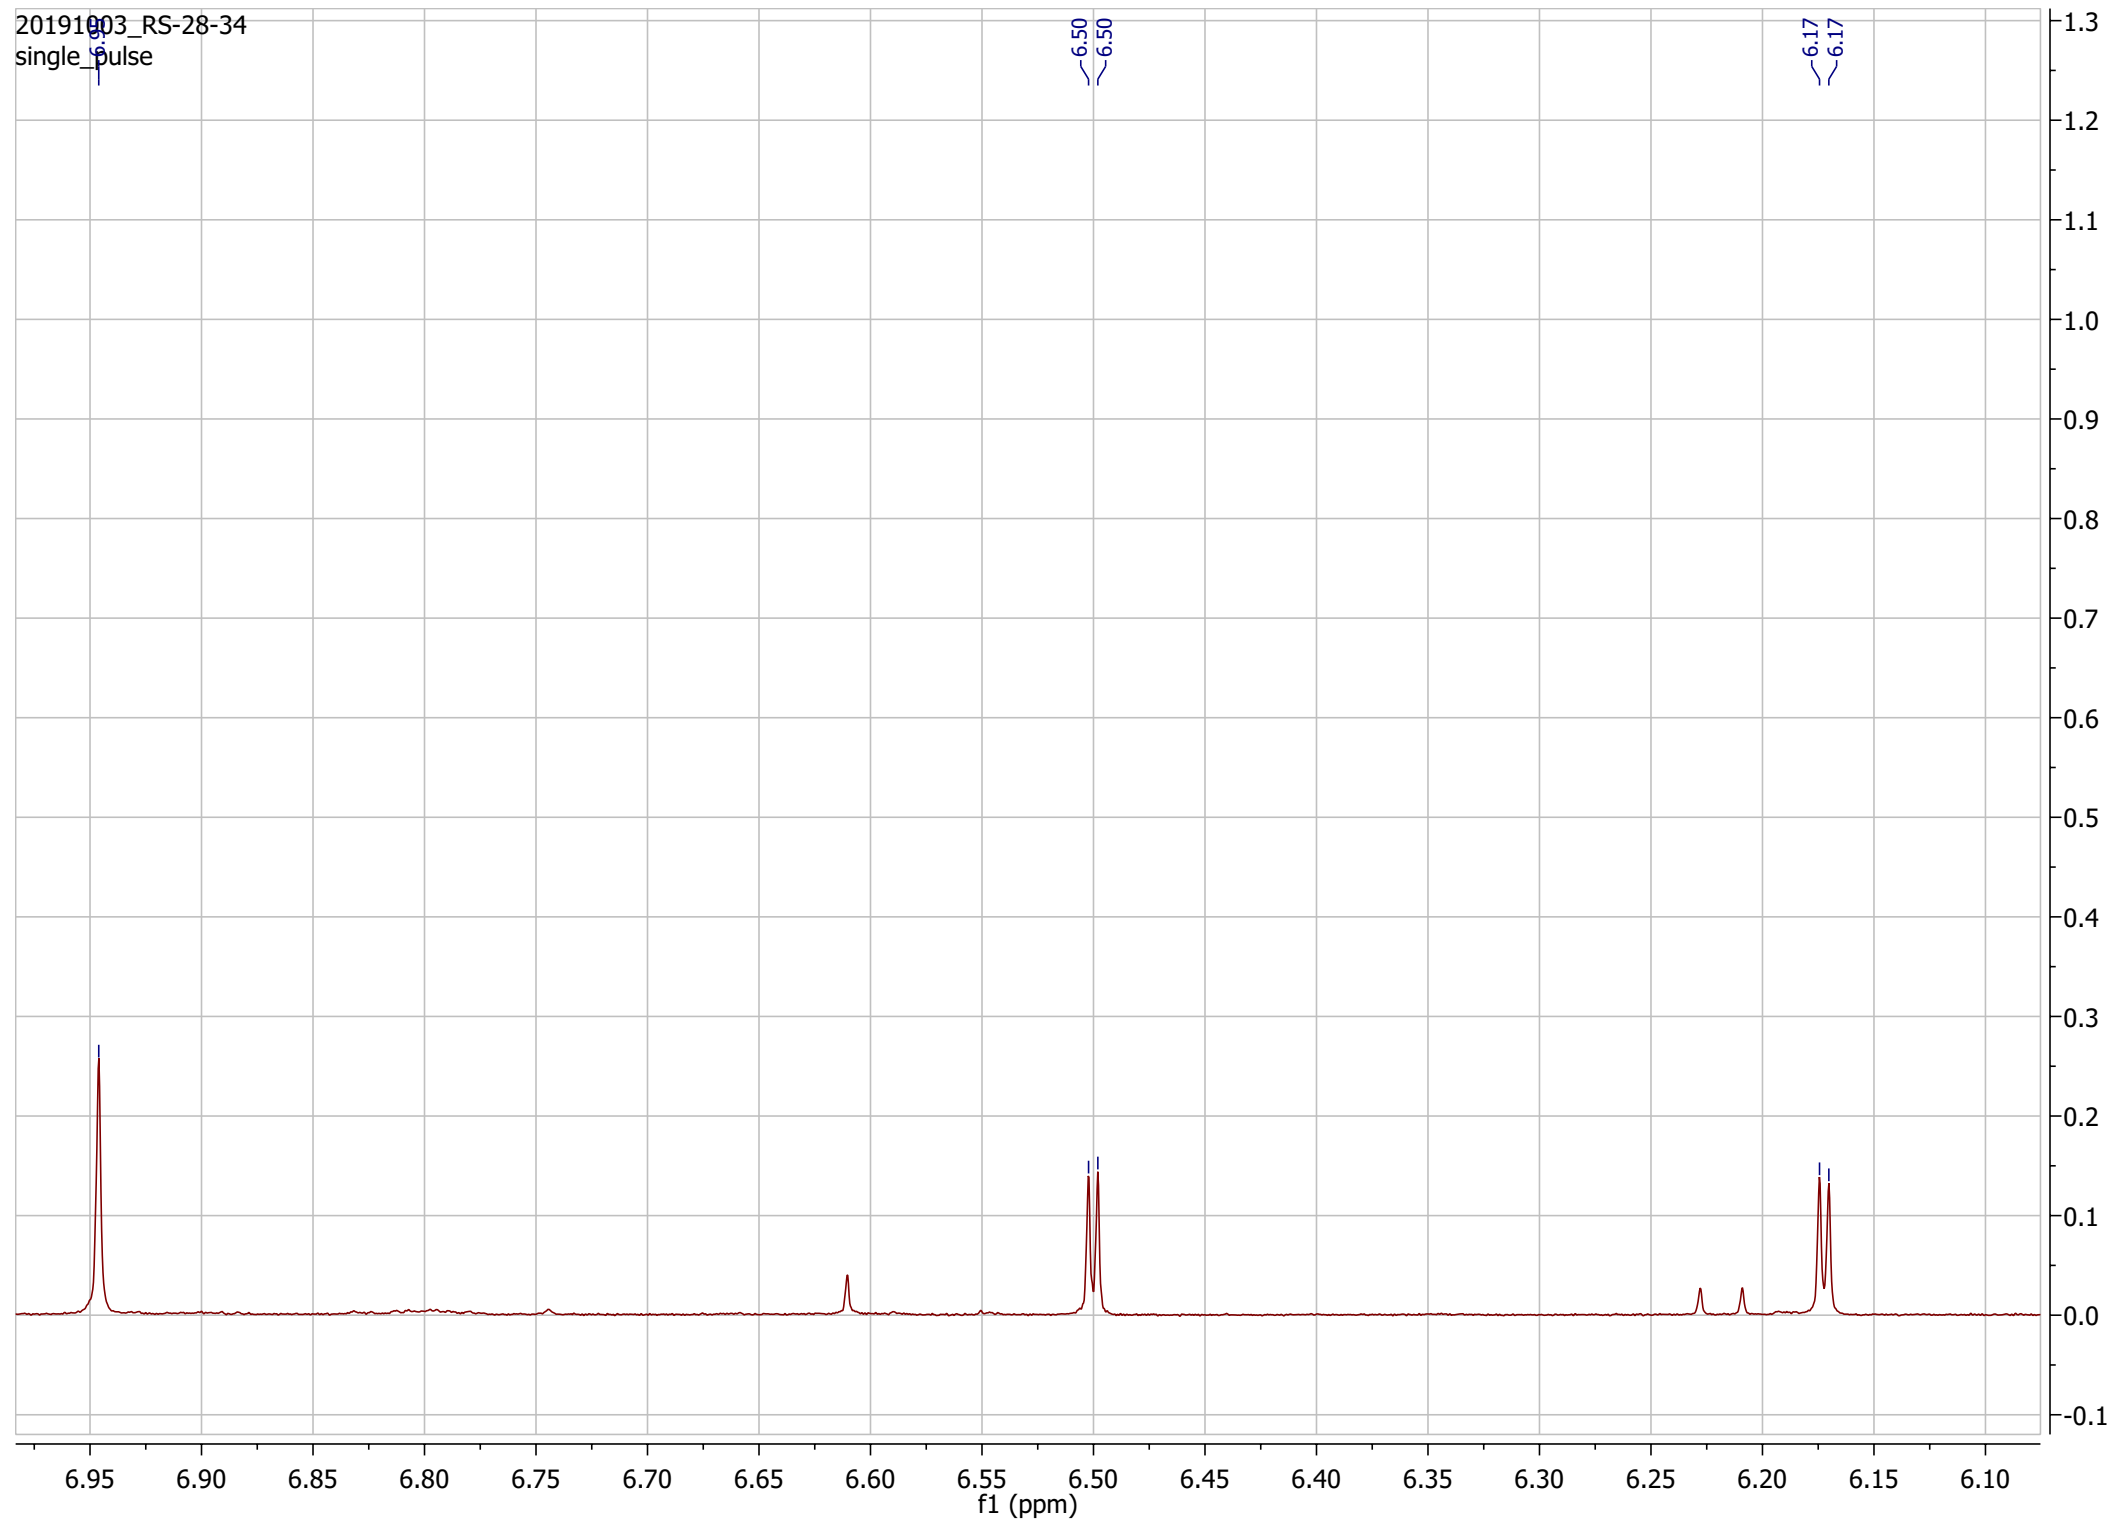

20191003\_RS-28-34  
single\_pulse

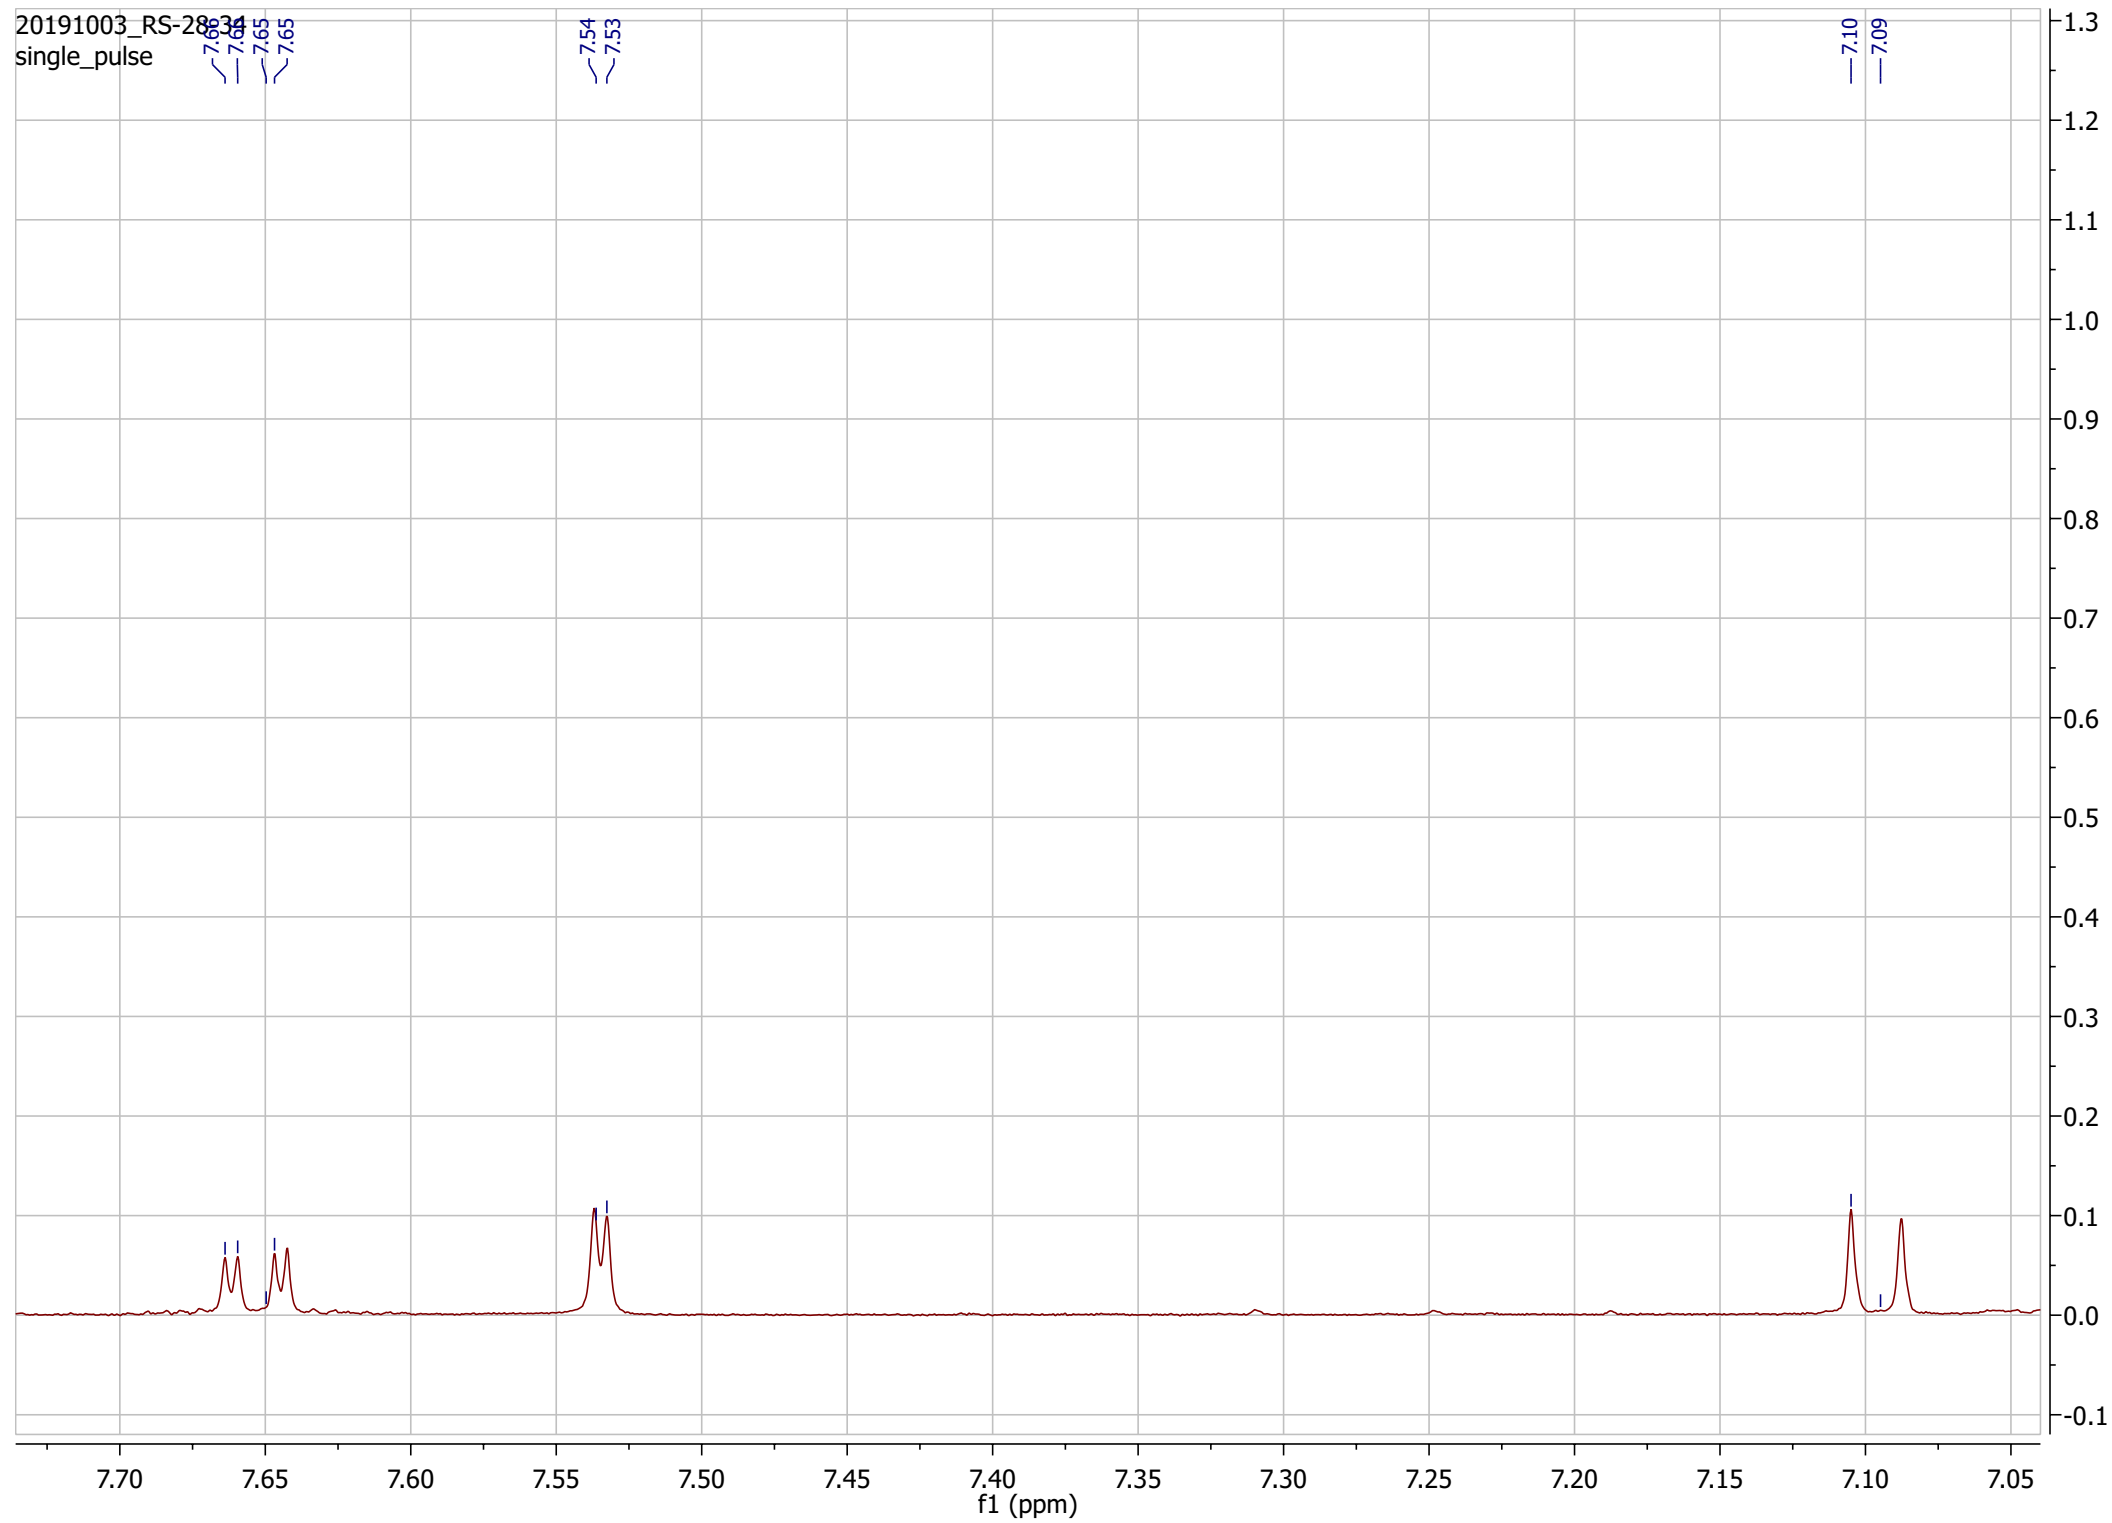

20191031\_AS-15-33-2  
single\_pulse

Compound-3-proton

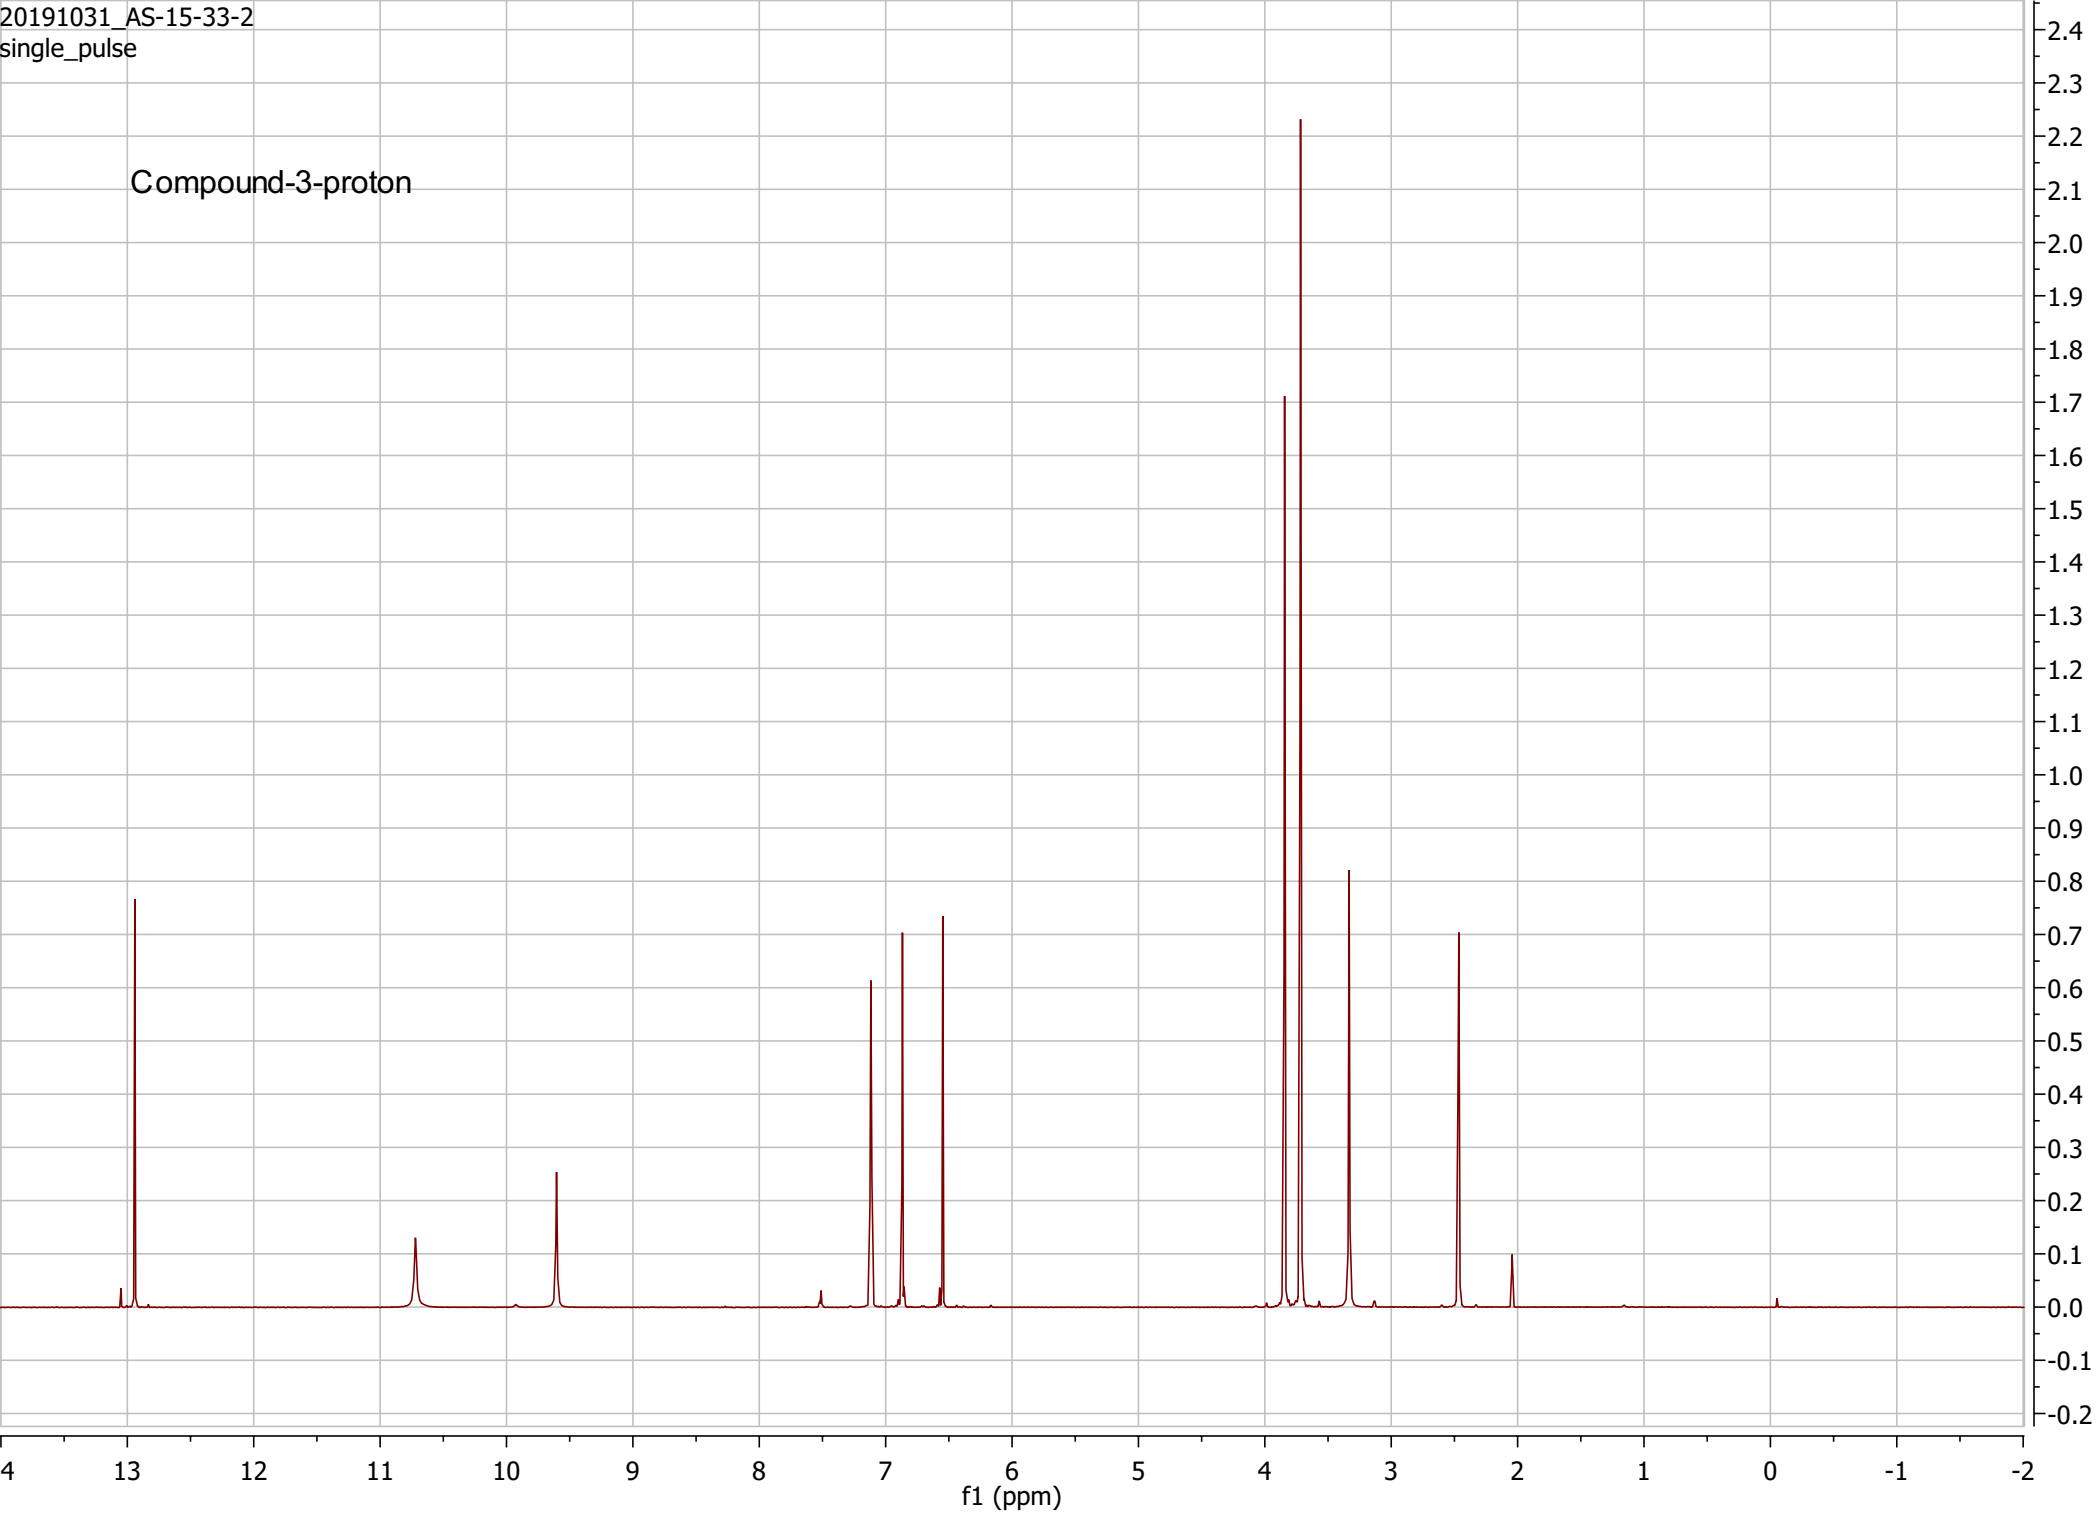

20191031\_AS-15-33-2

single\_pulse

Compound-3-proton

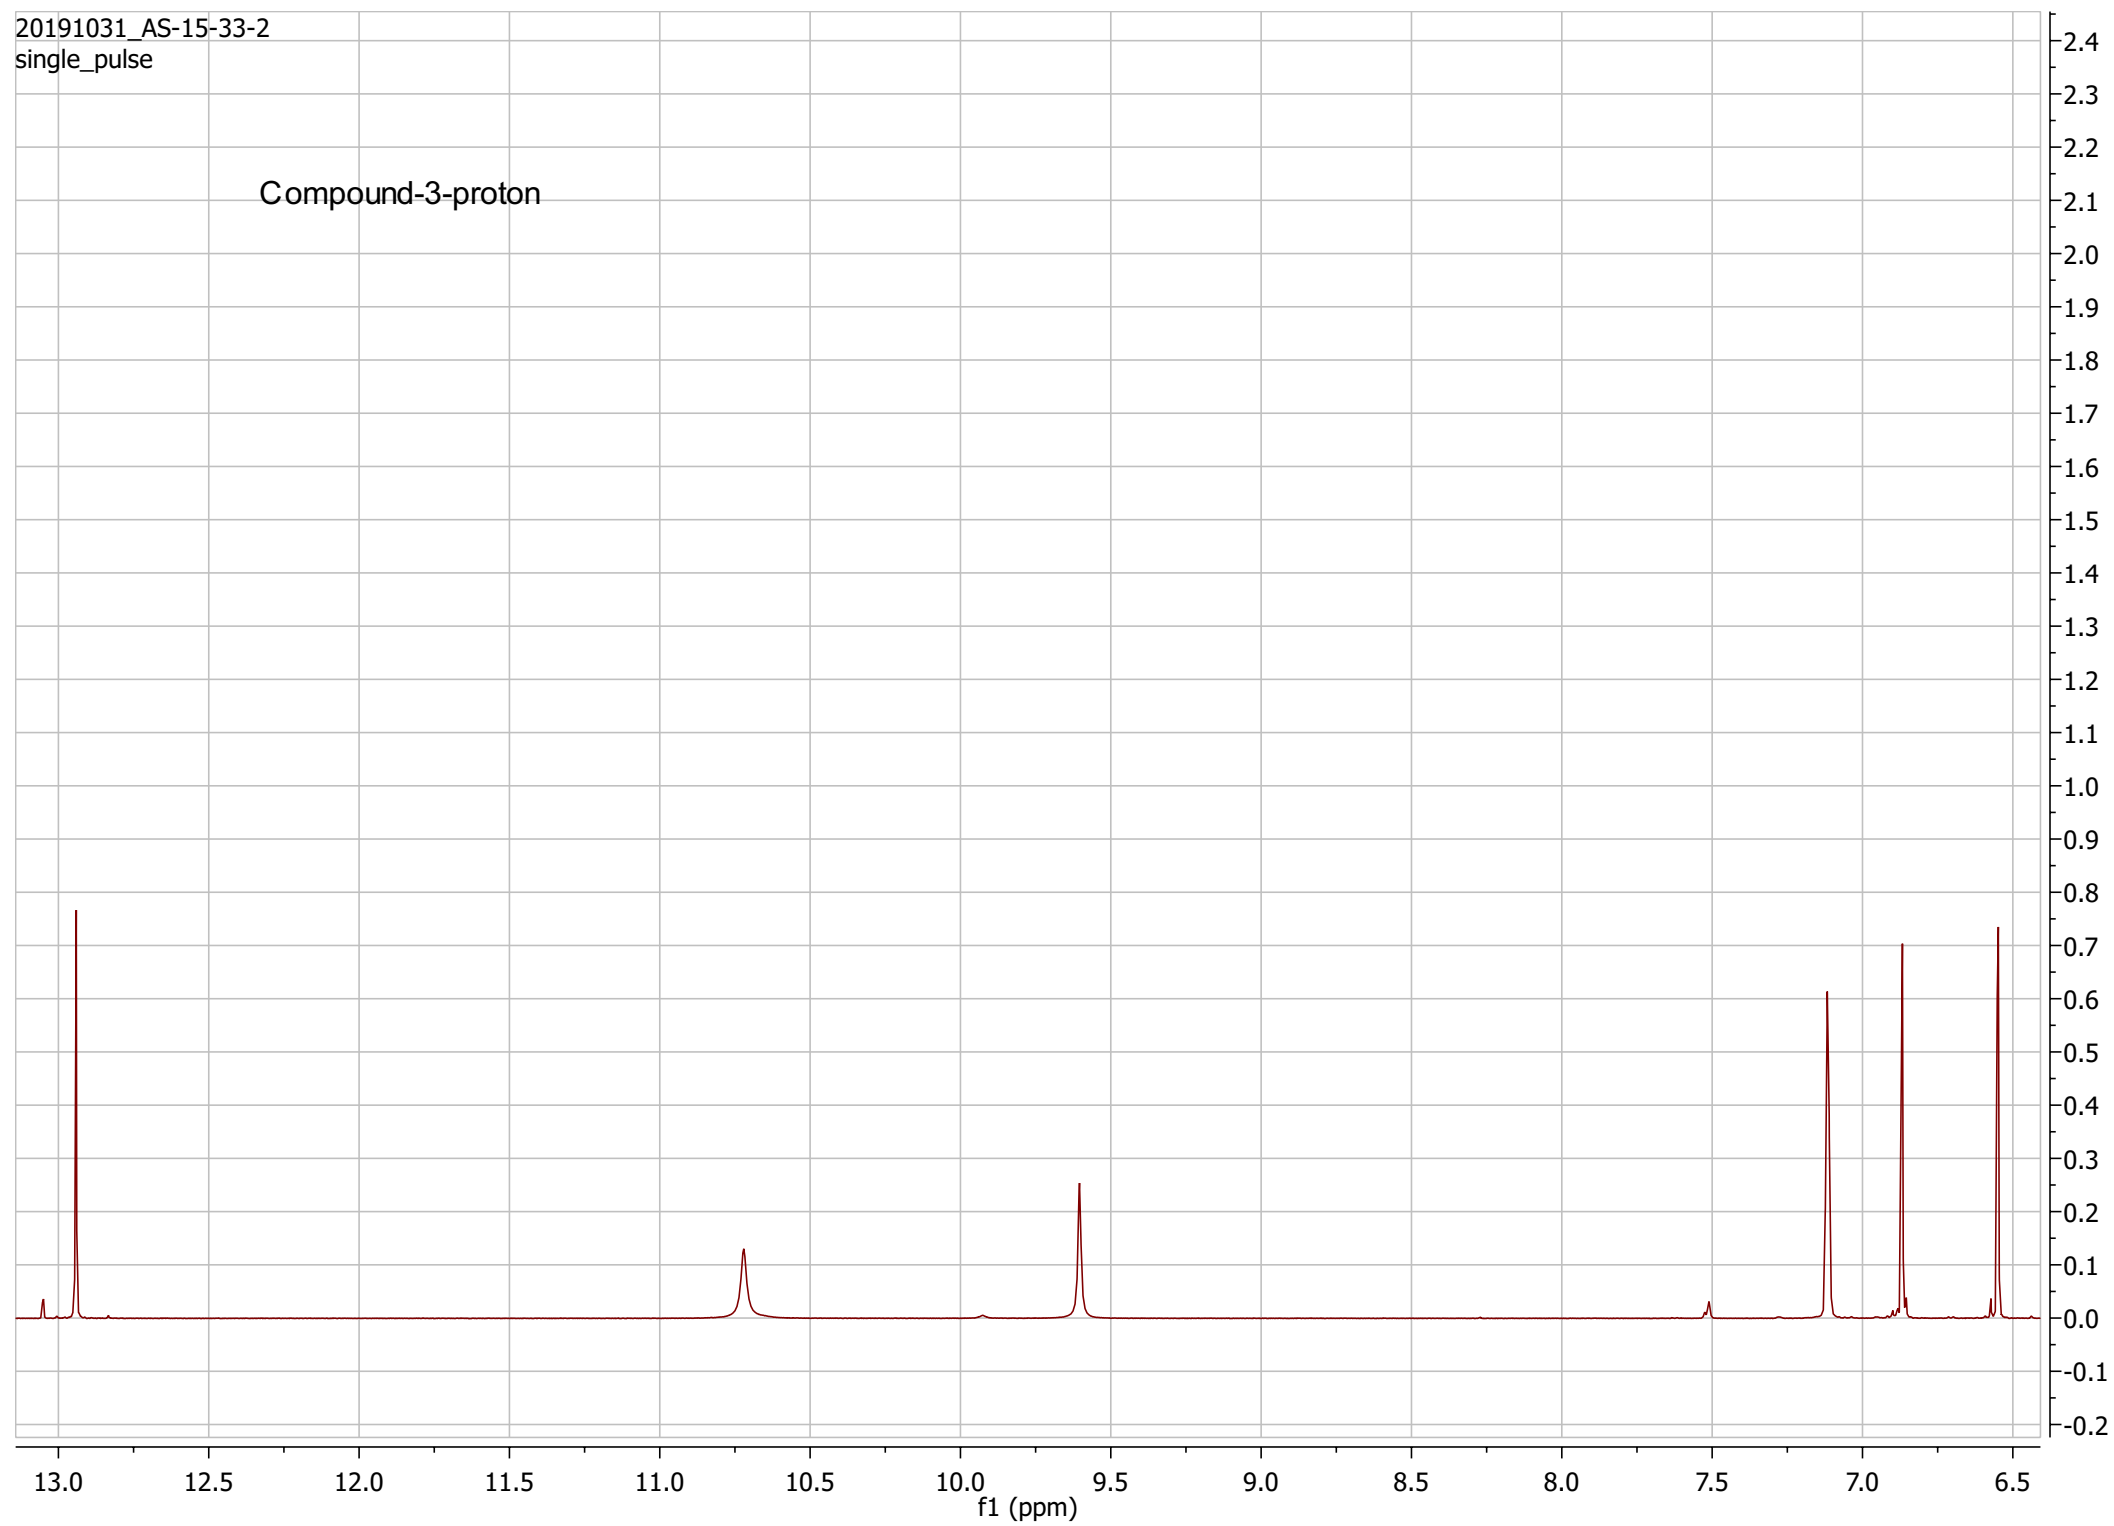

20191105-AS-15-33-2  
single pulse decoupled gated NOE

Compound-3-carbon

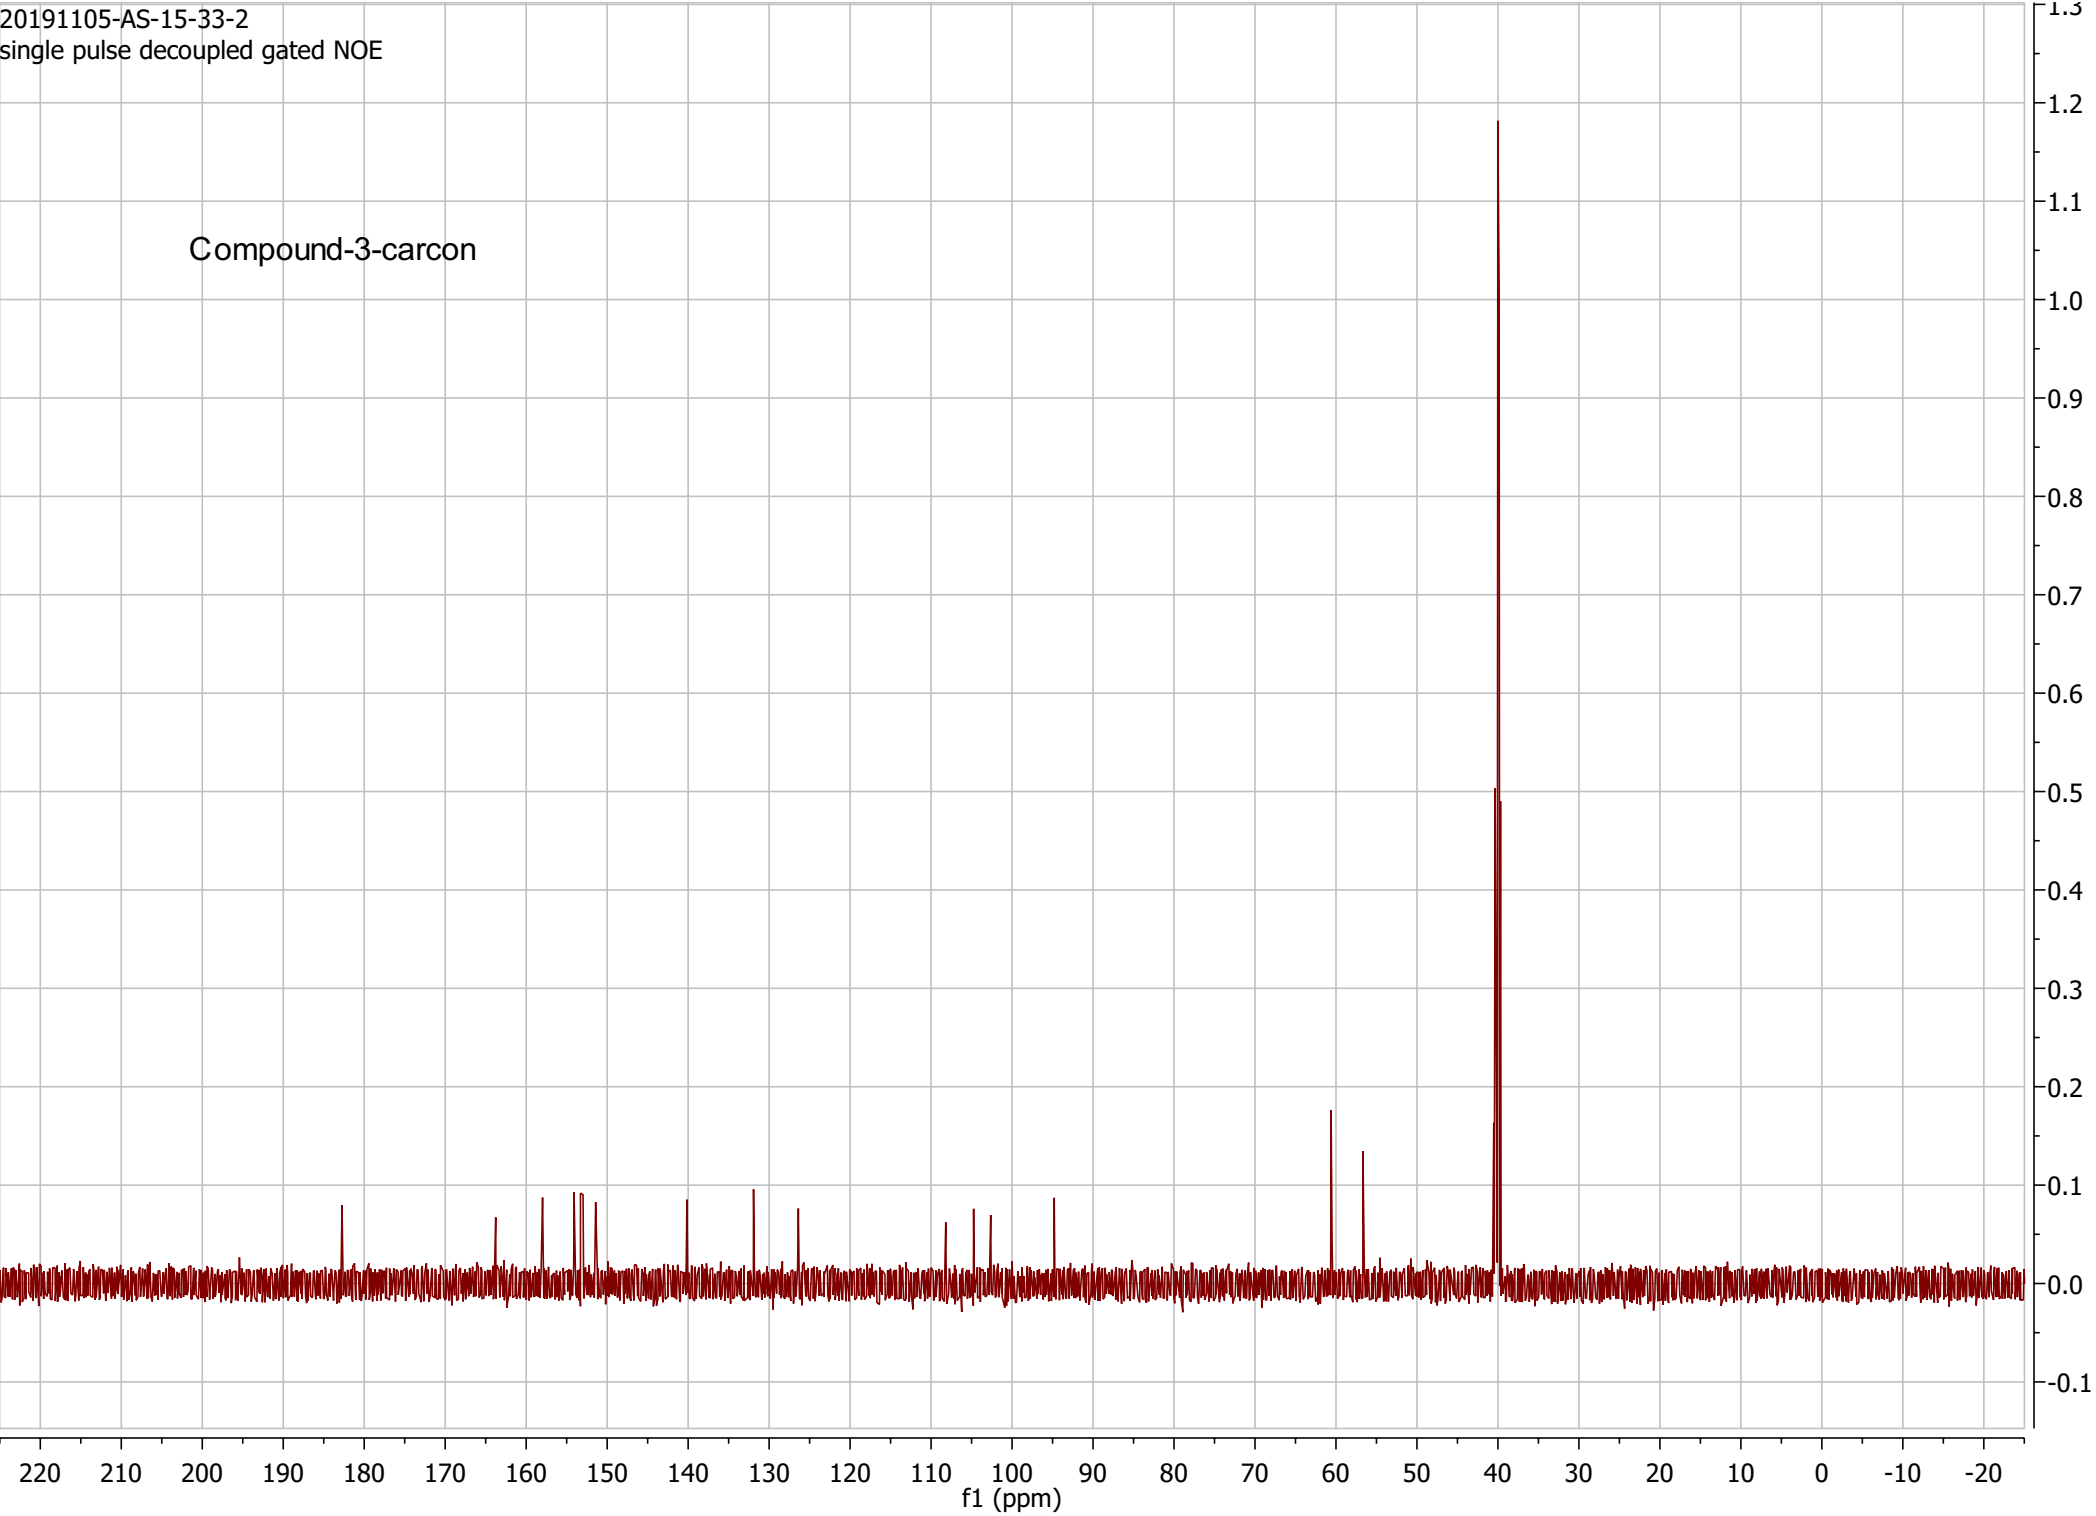

20191105-AS-15-33-2  
single pulse decoupled gated NOE

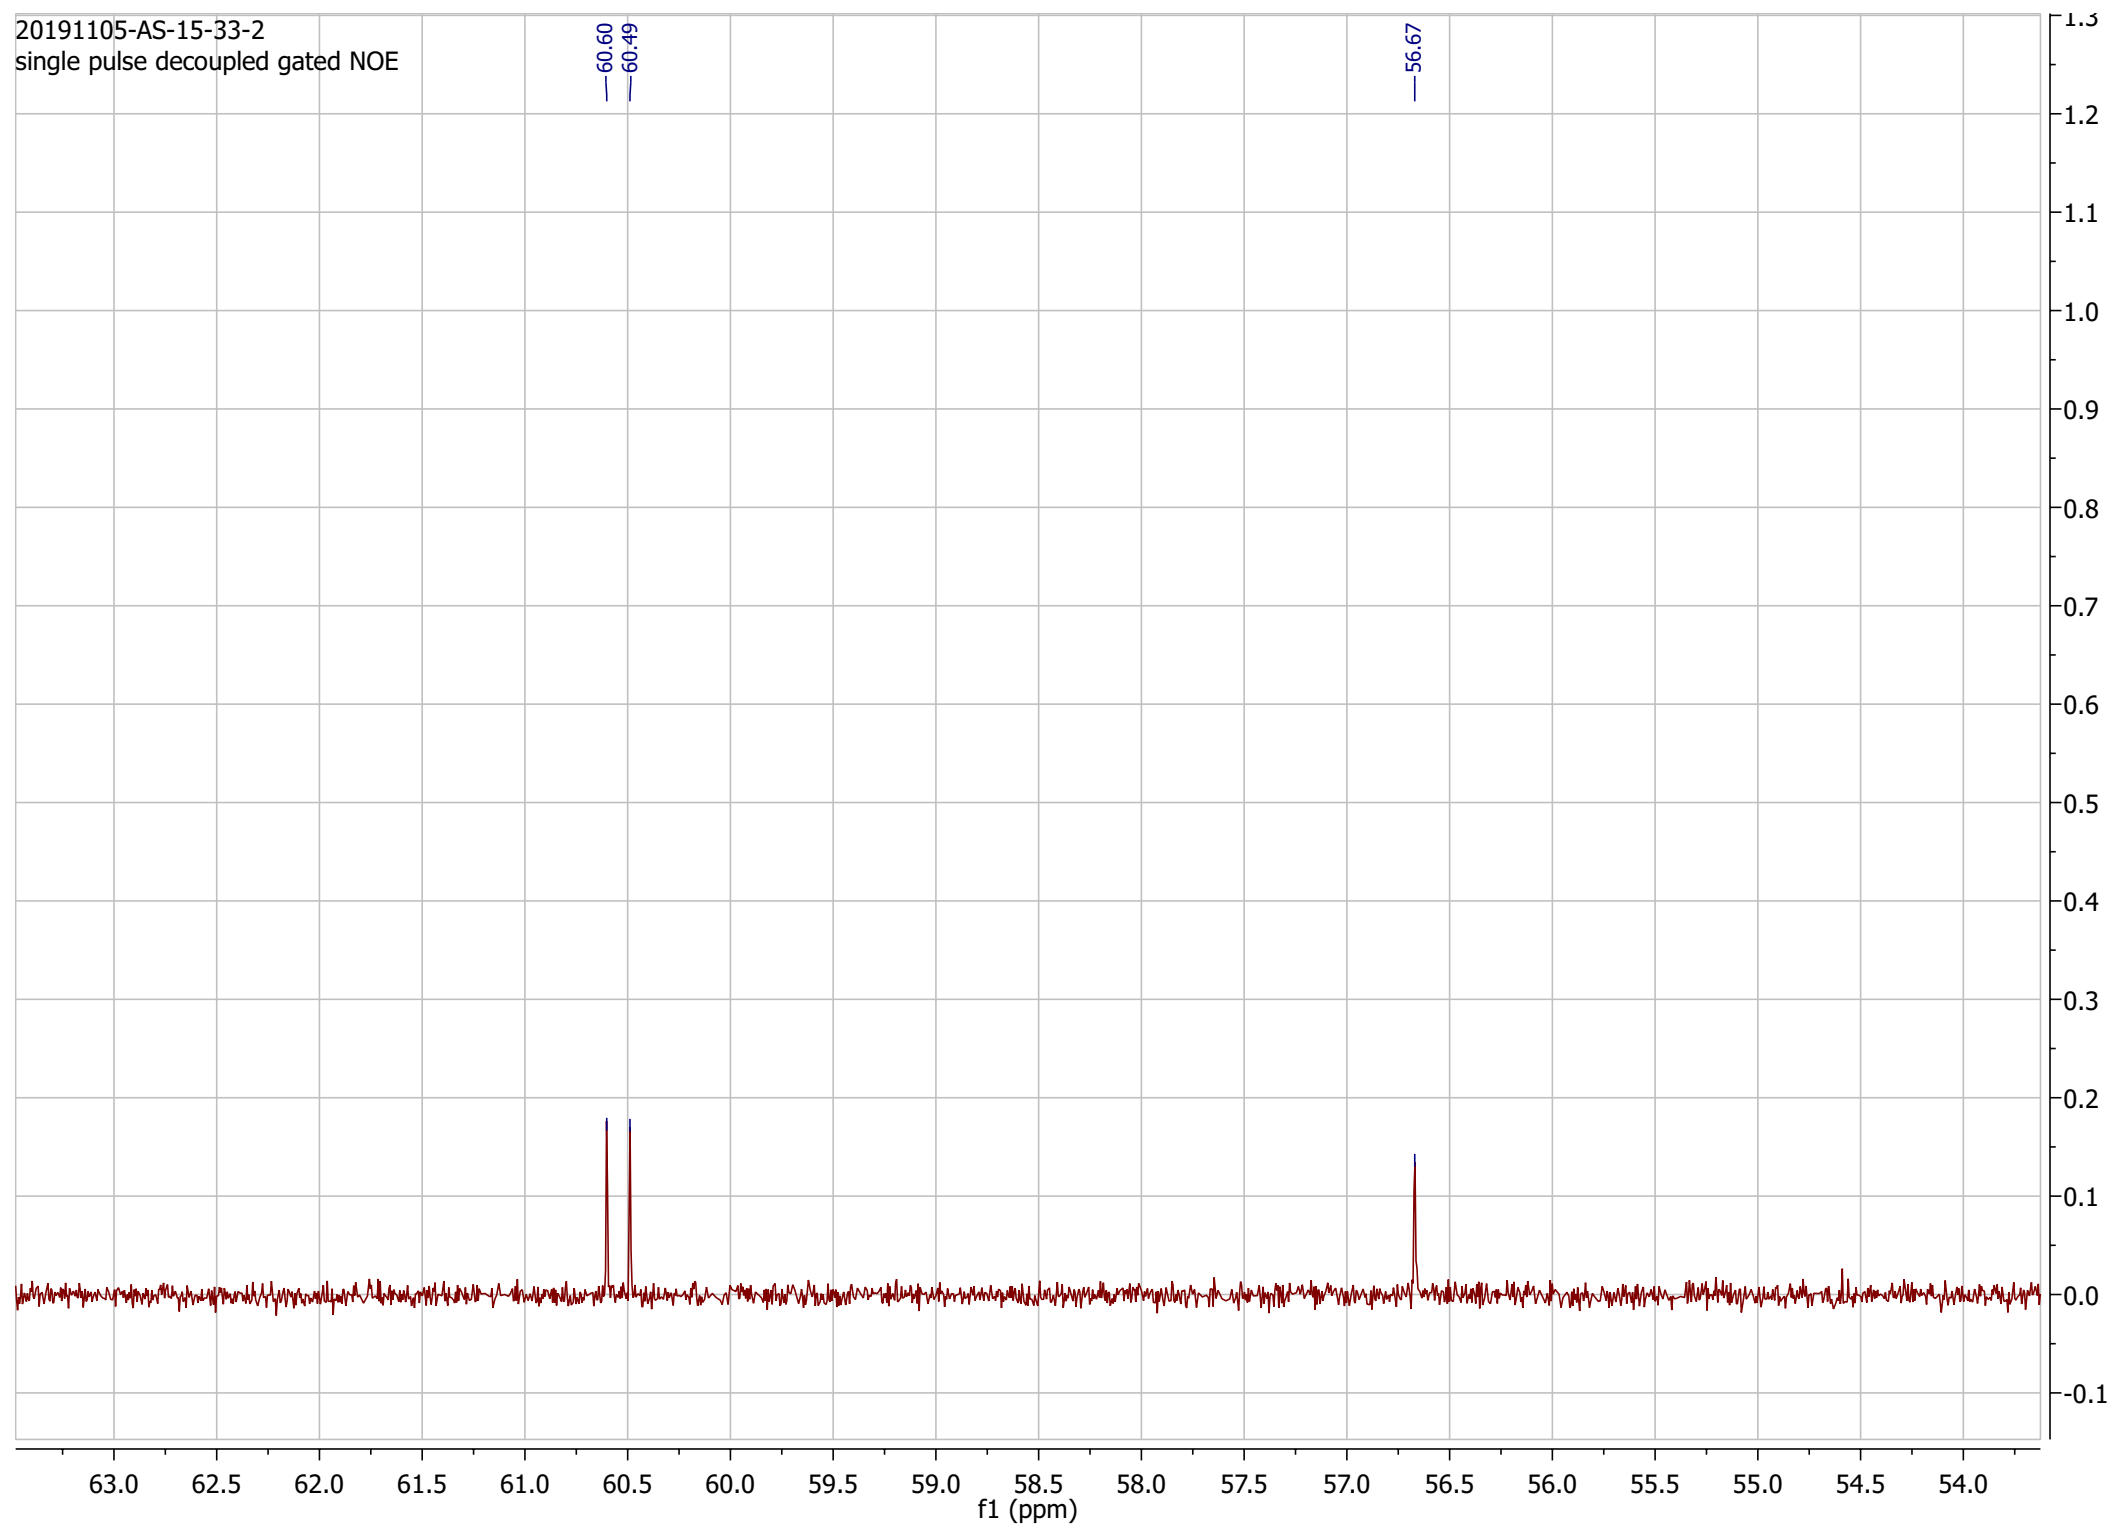

20191105-AS-15-33-2  
single pulse decoupled gated NOE

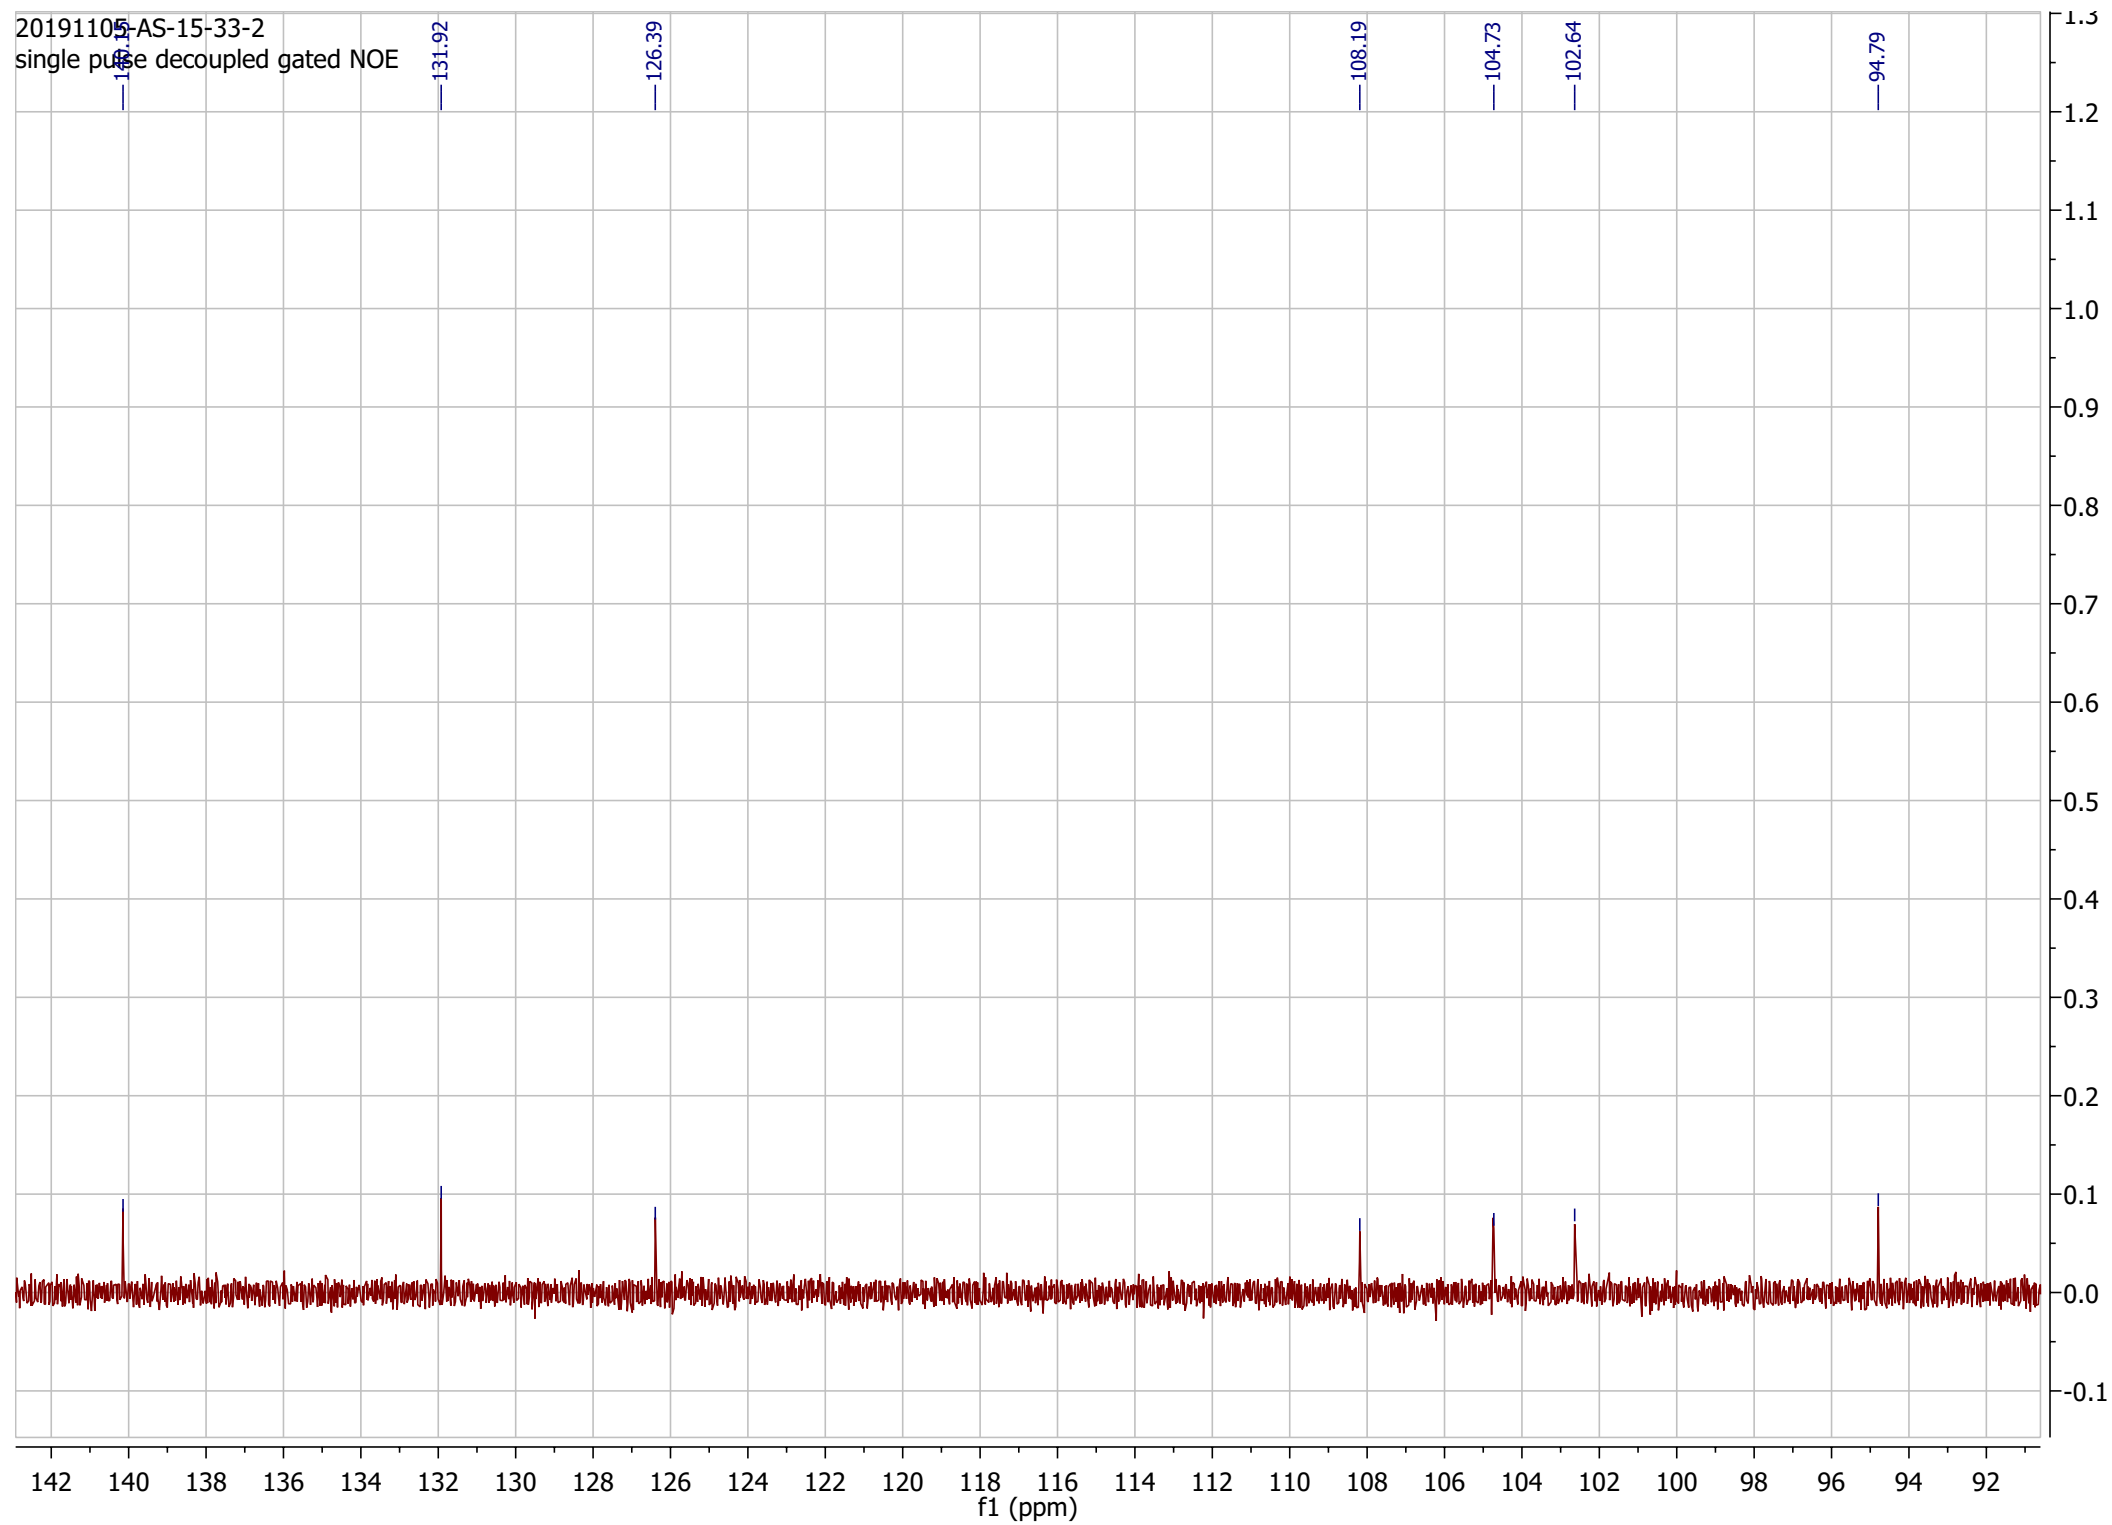

20191105-AS-15-83-2  
single pulse decoupled gated NOE

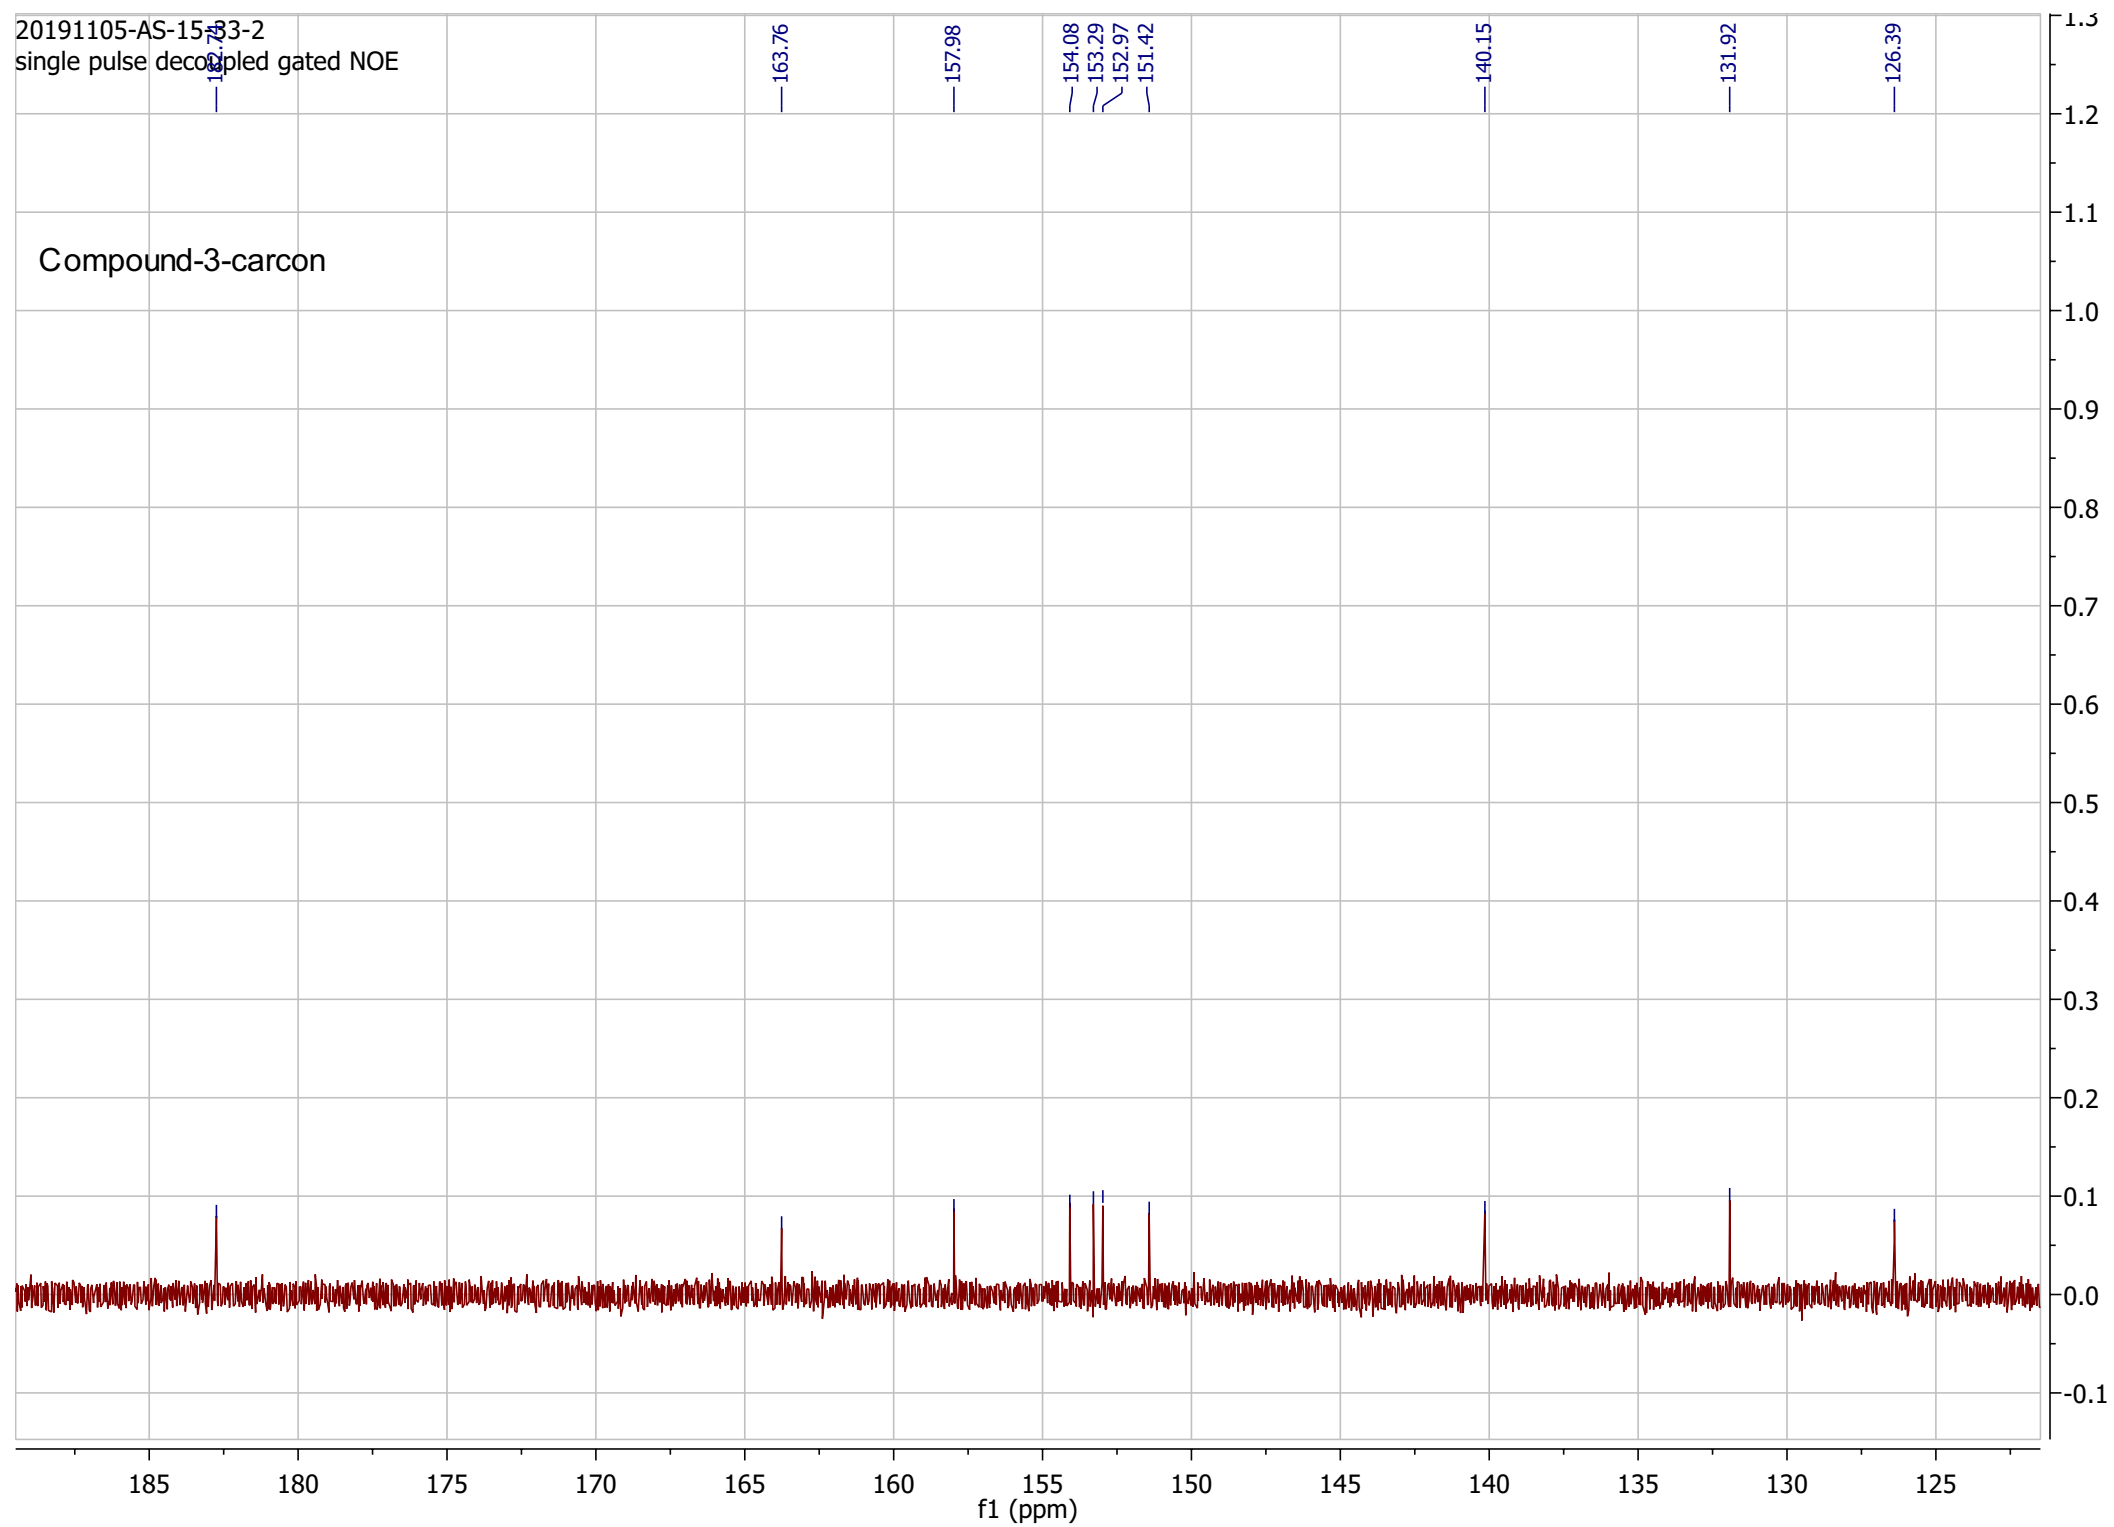



20191112-AS-89-94  
single\_pulse

Compound-4-proton

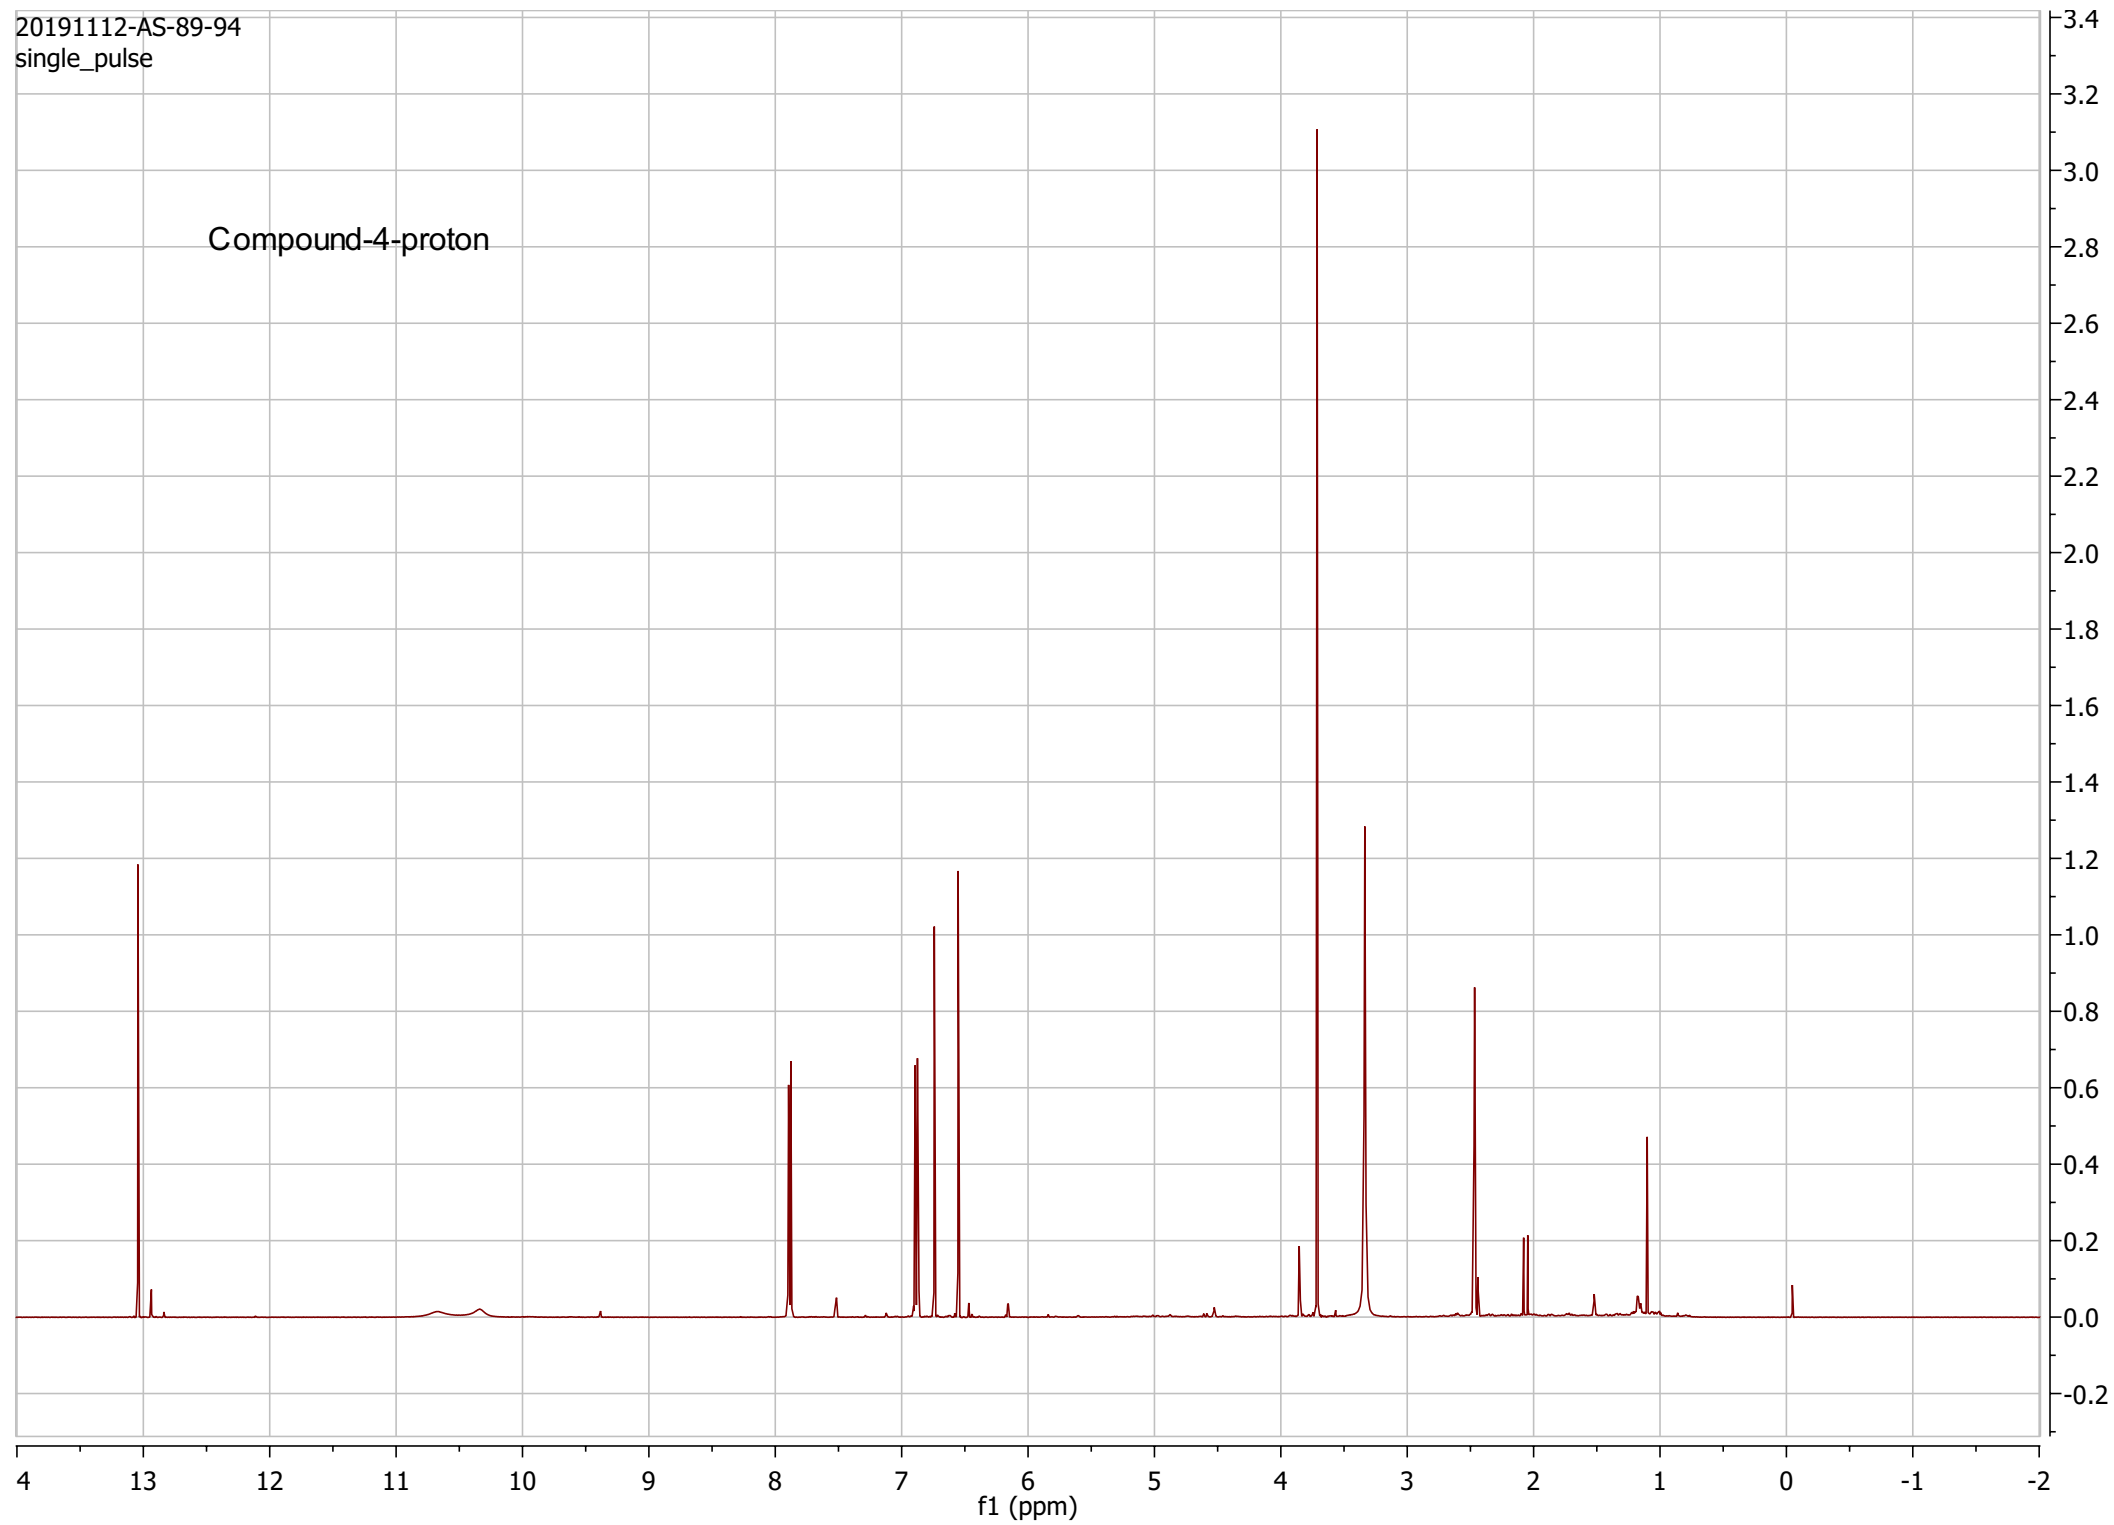

20191112-AS-89-94  
single\_pulse

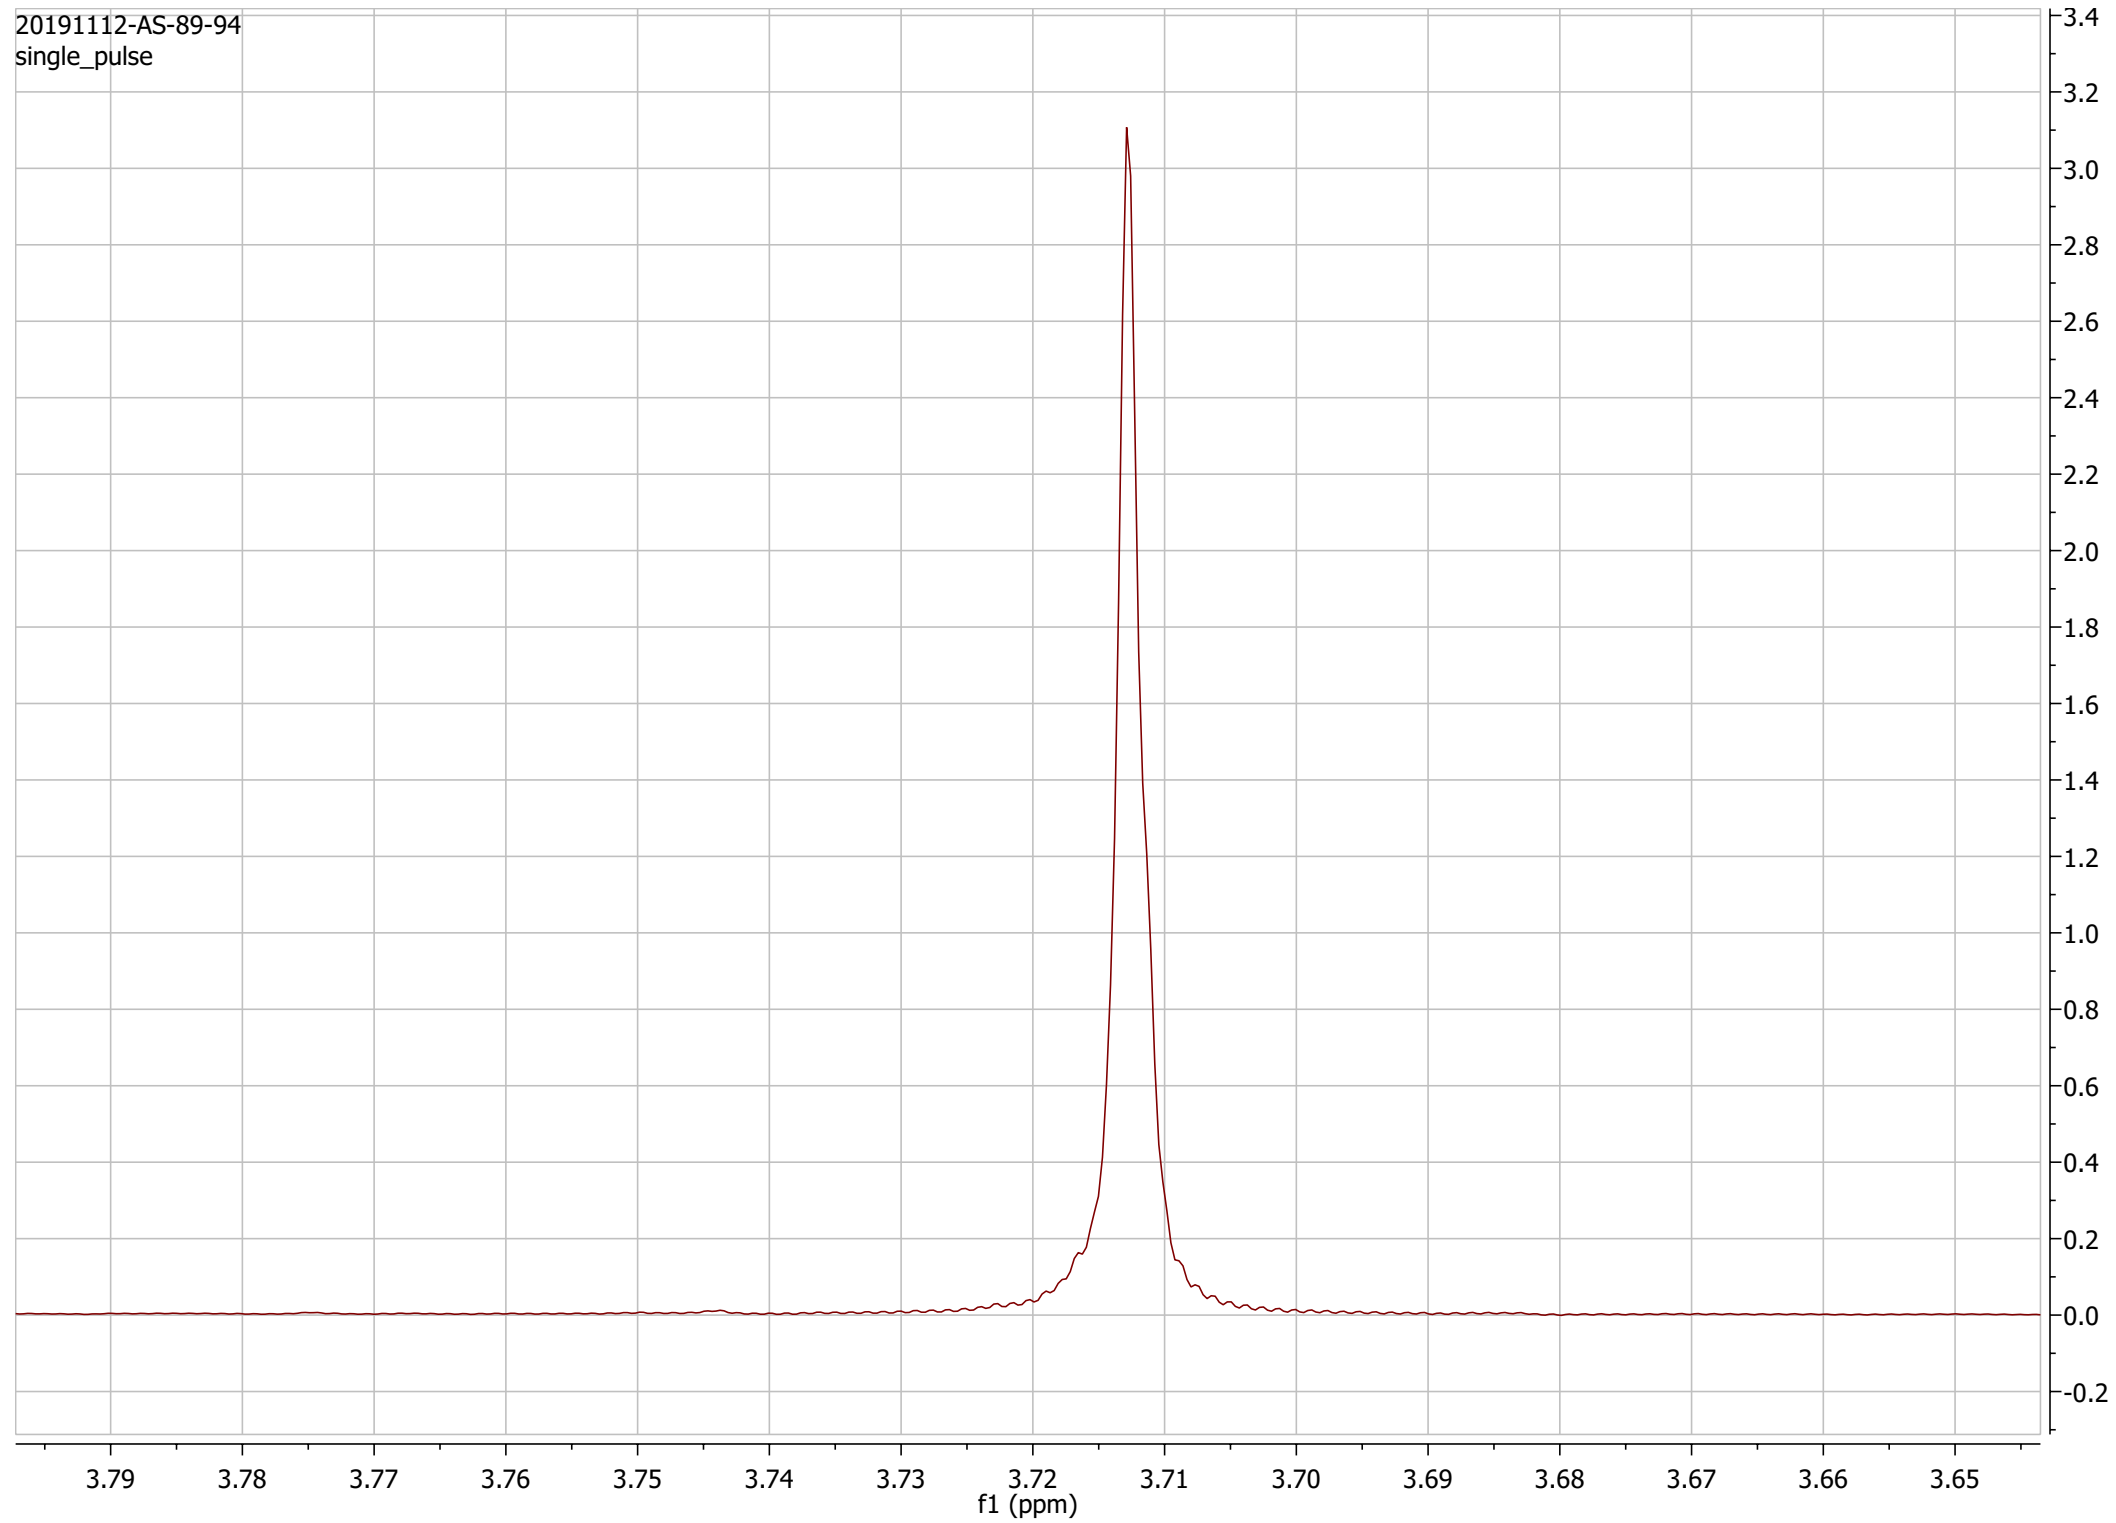

20191112-AS-89-94  
single\_pulse

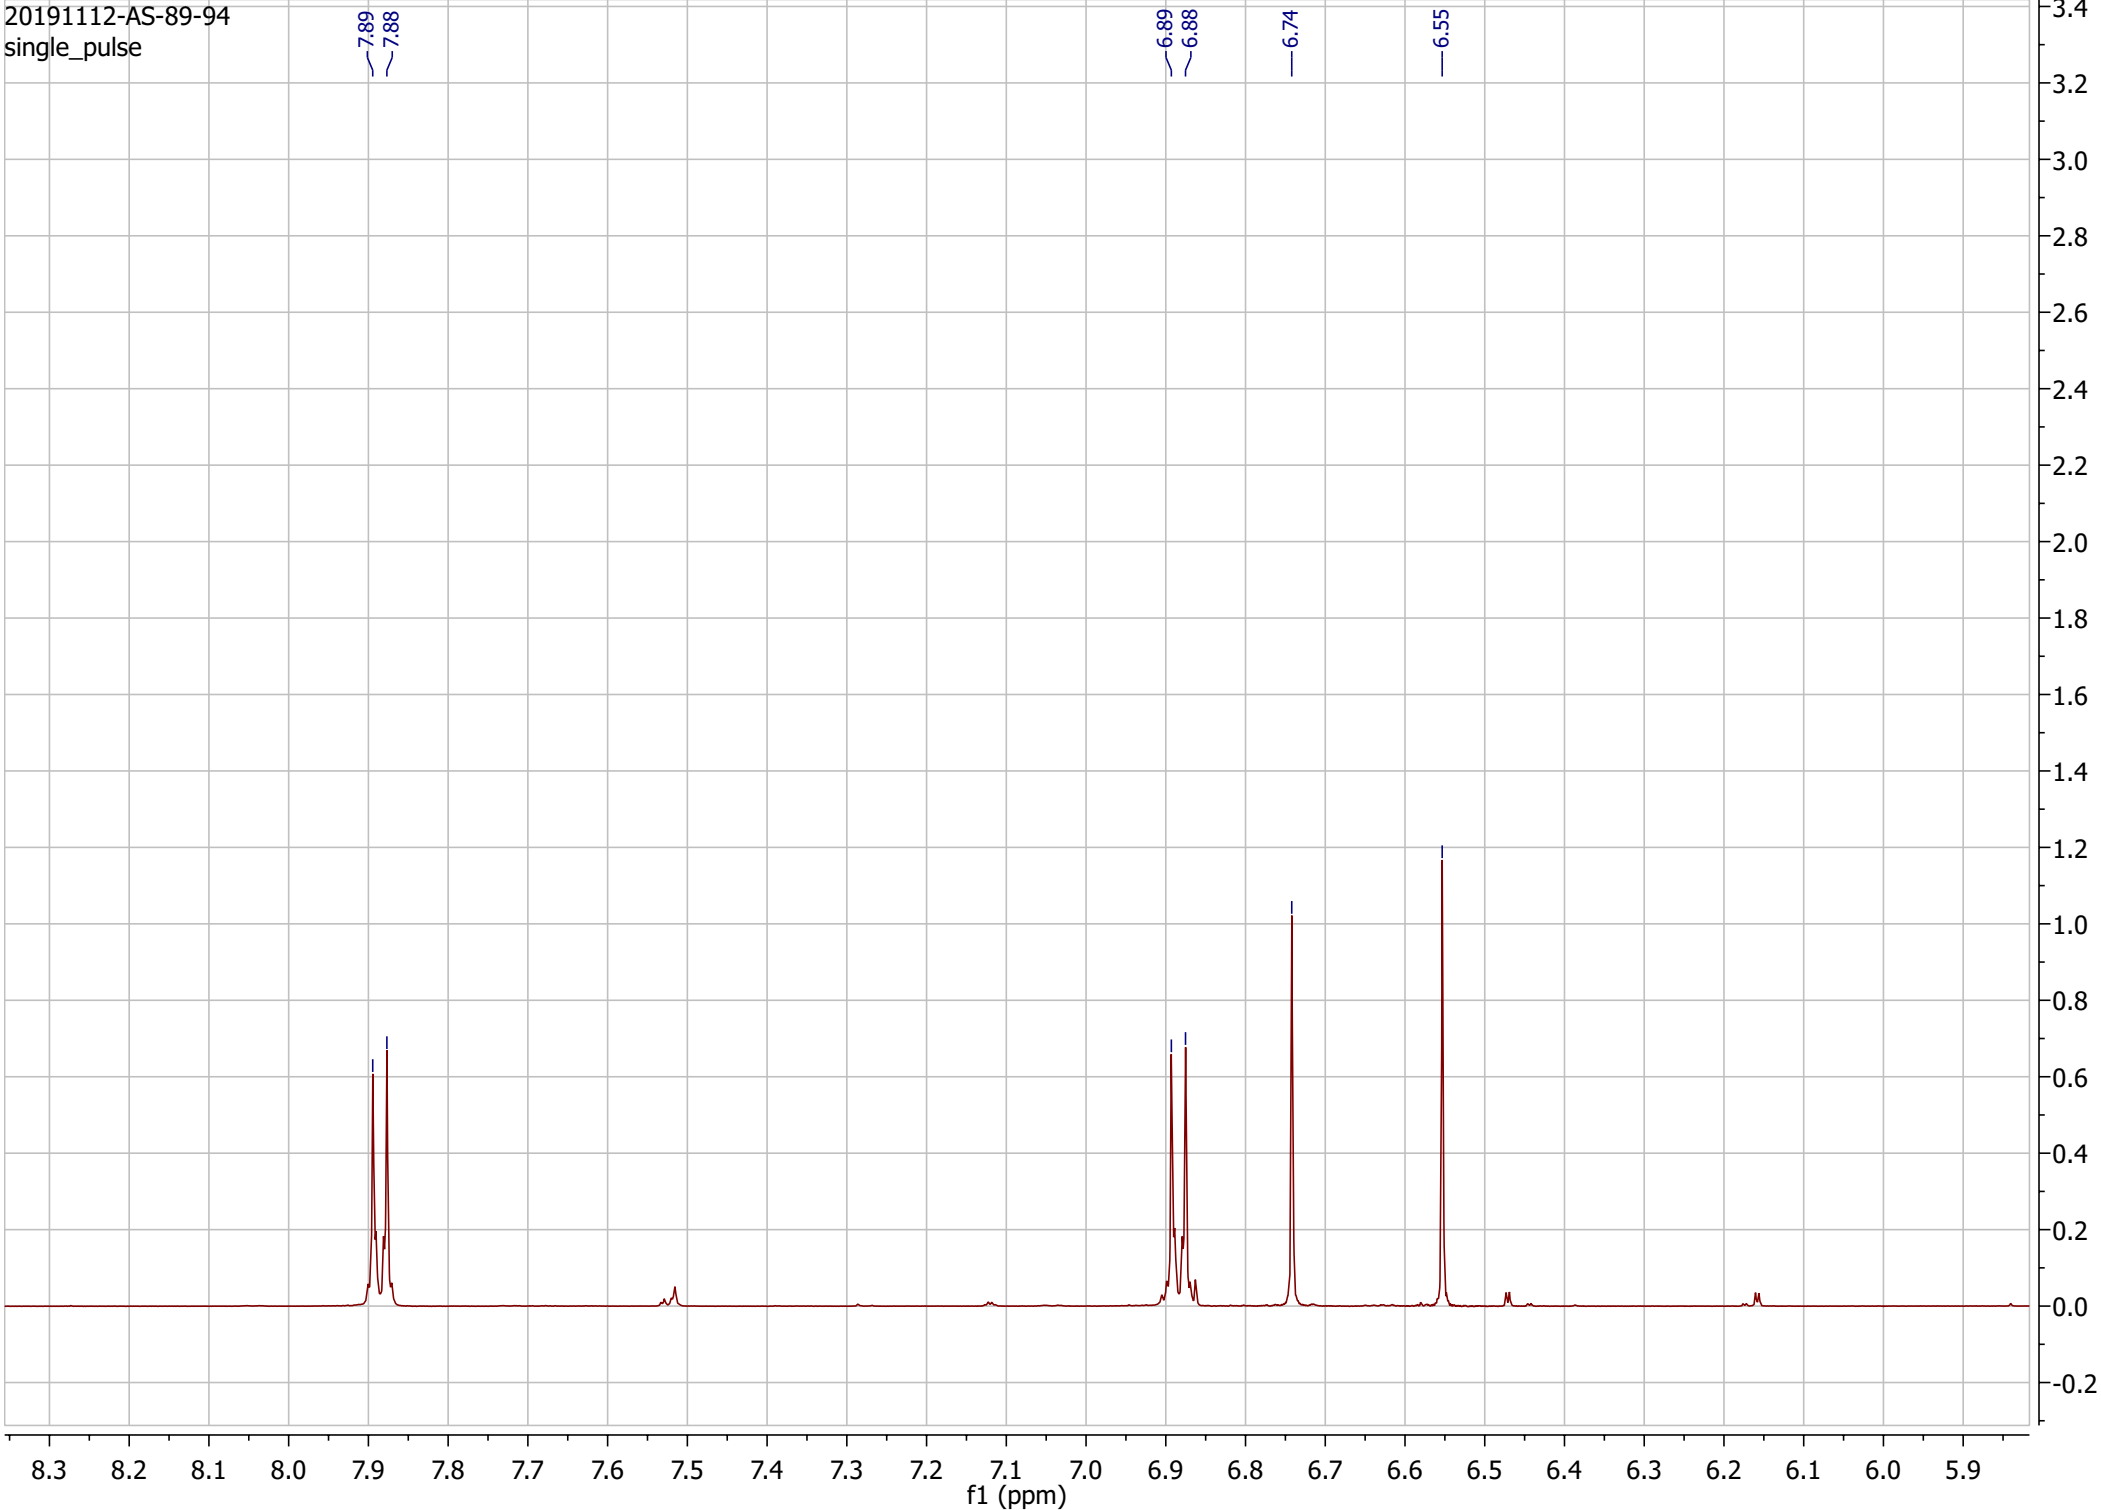

20191112-AS-89-94  
single\_pulse

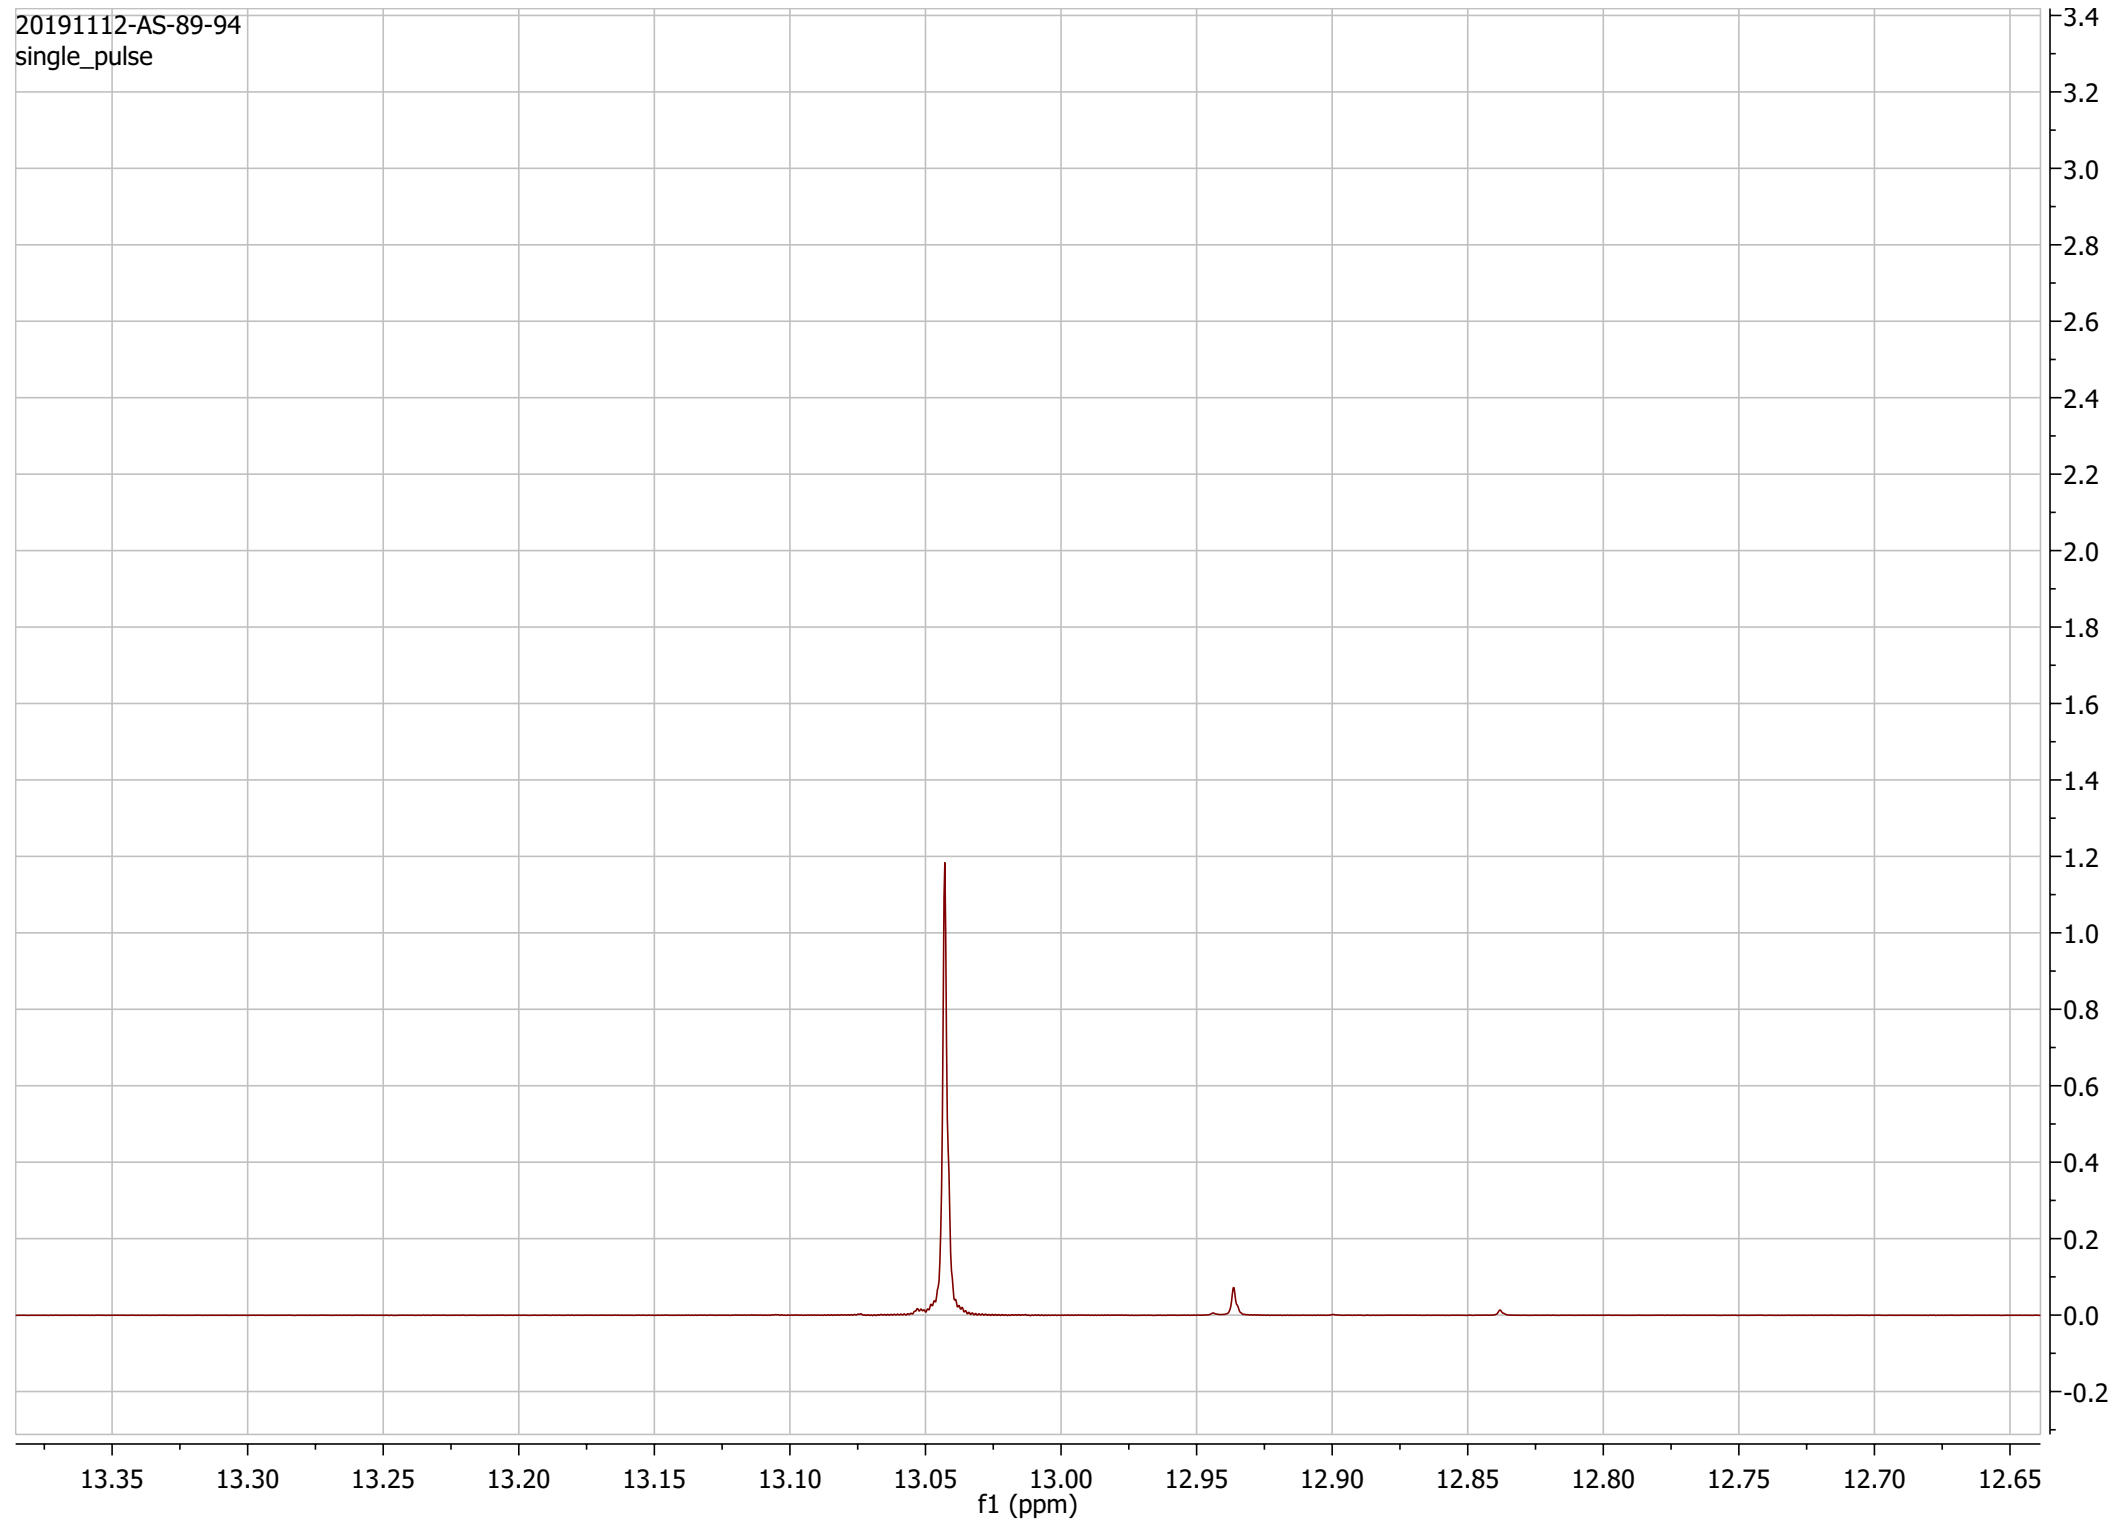

20191112-AS-89-94  
single pulse decoupled gated NOE

Compound-4-carbon

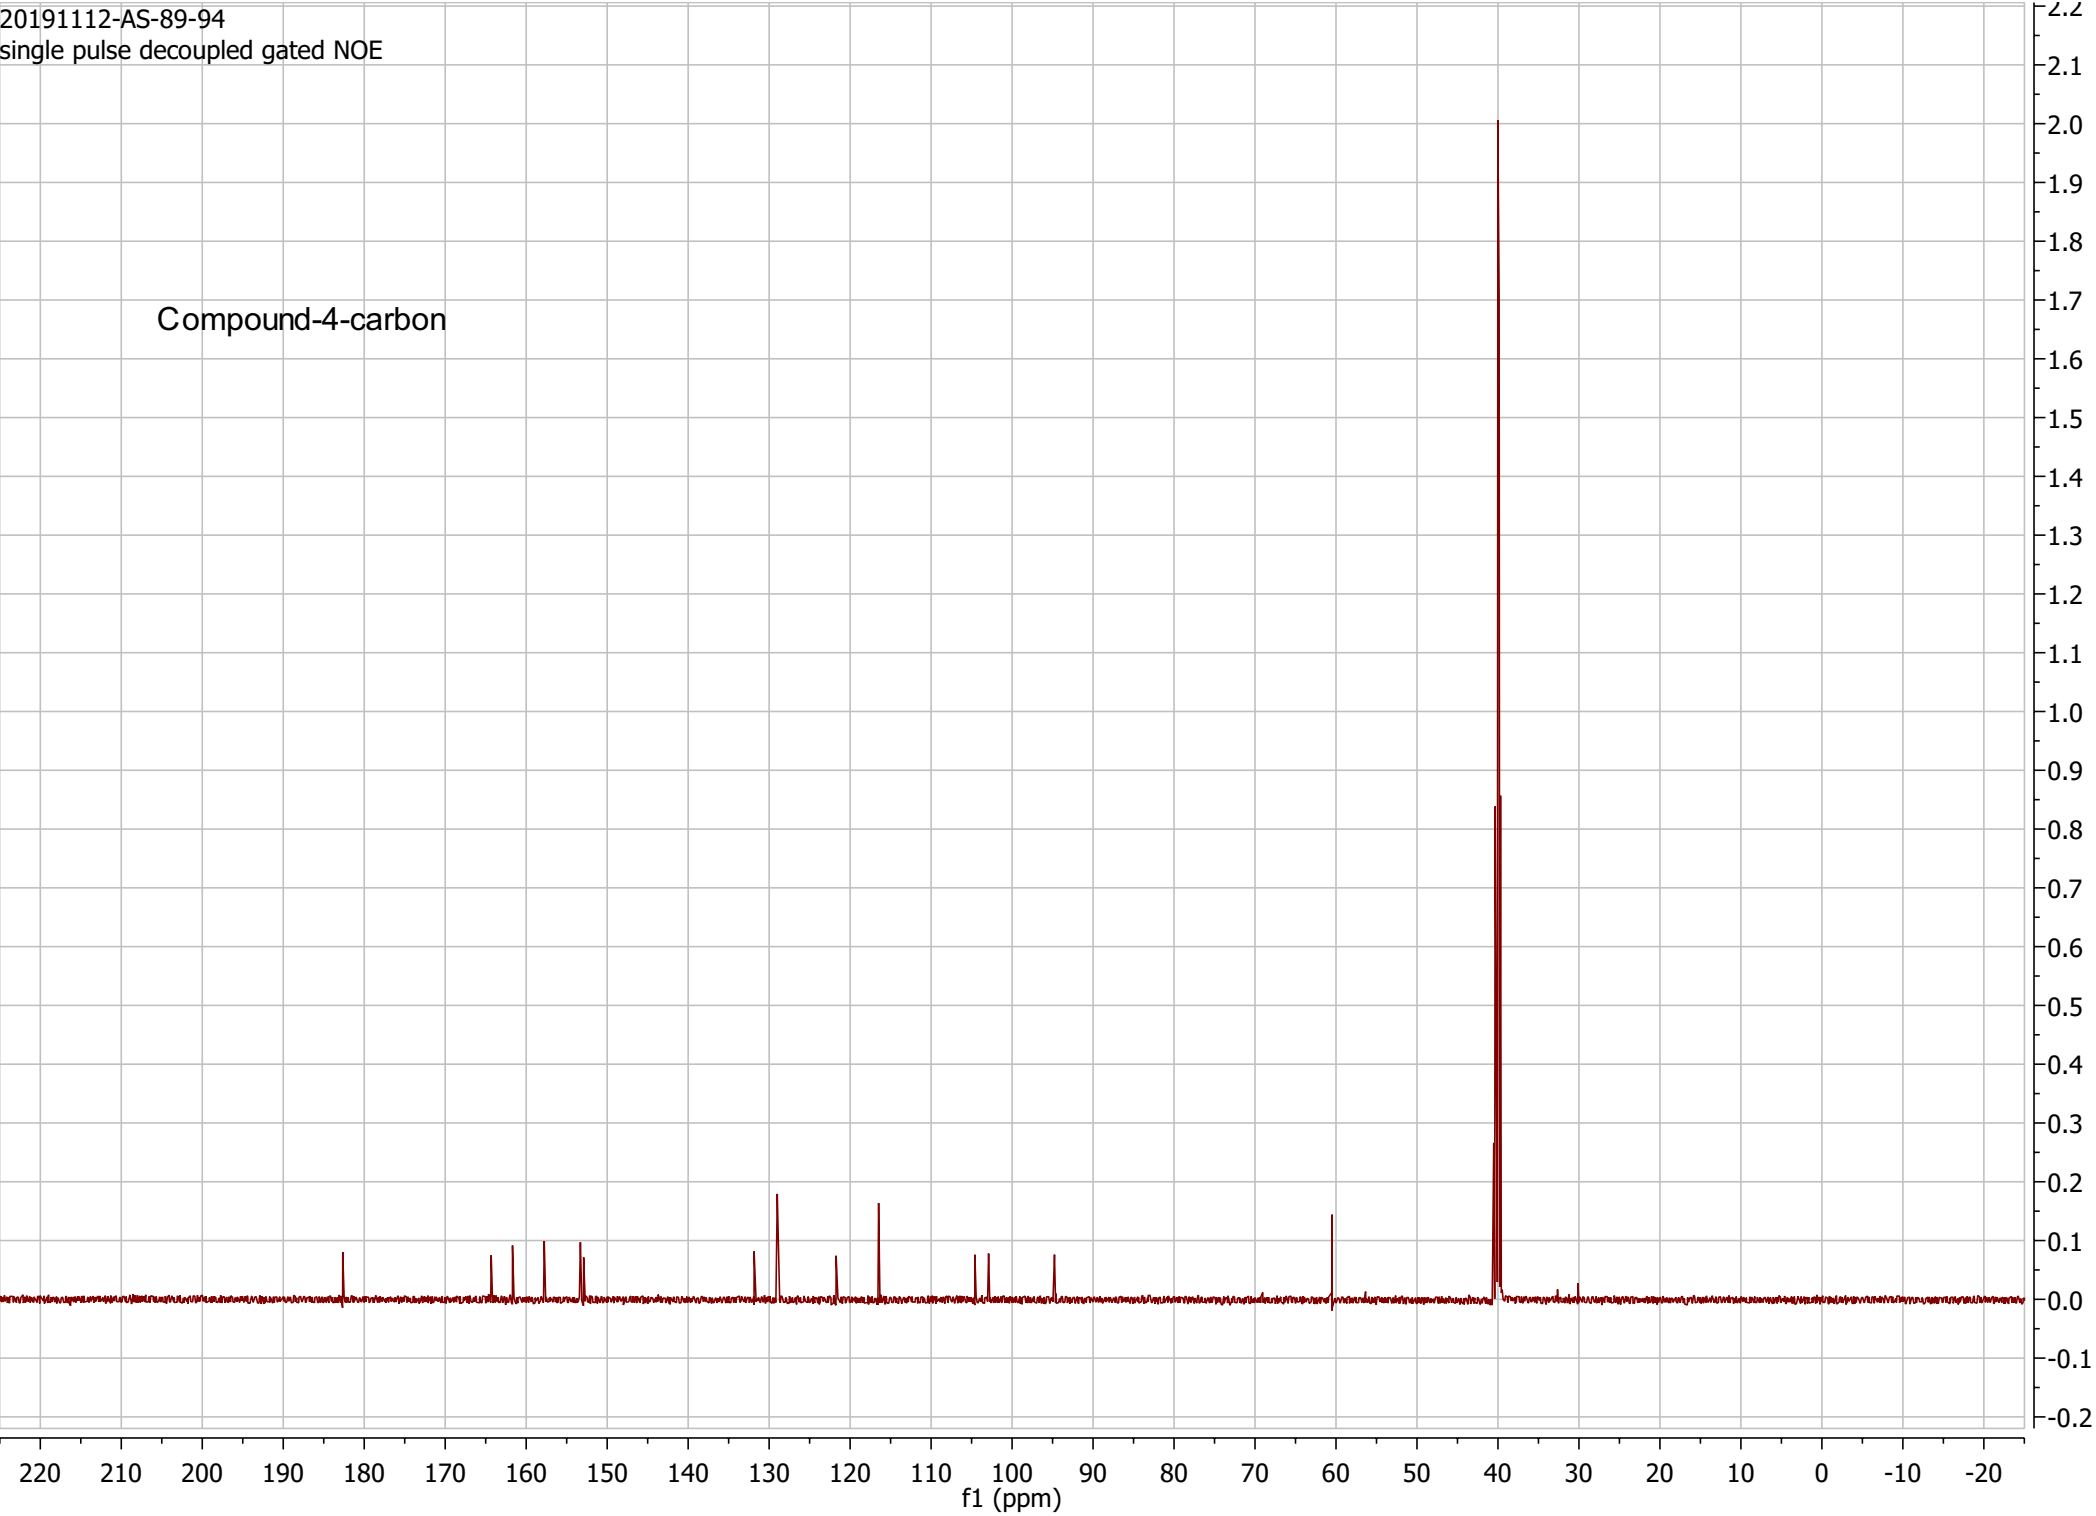

20191112-AS-89-94  
single pulse decoupled gated NOE

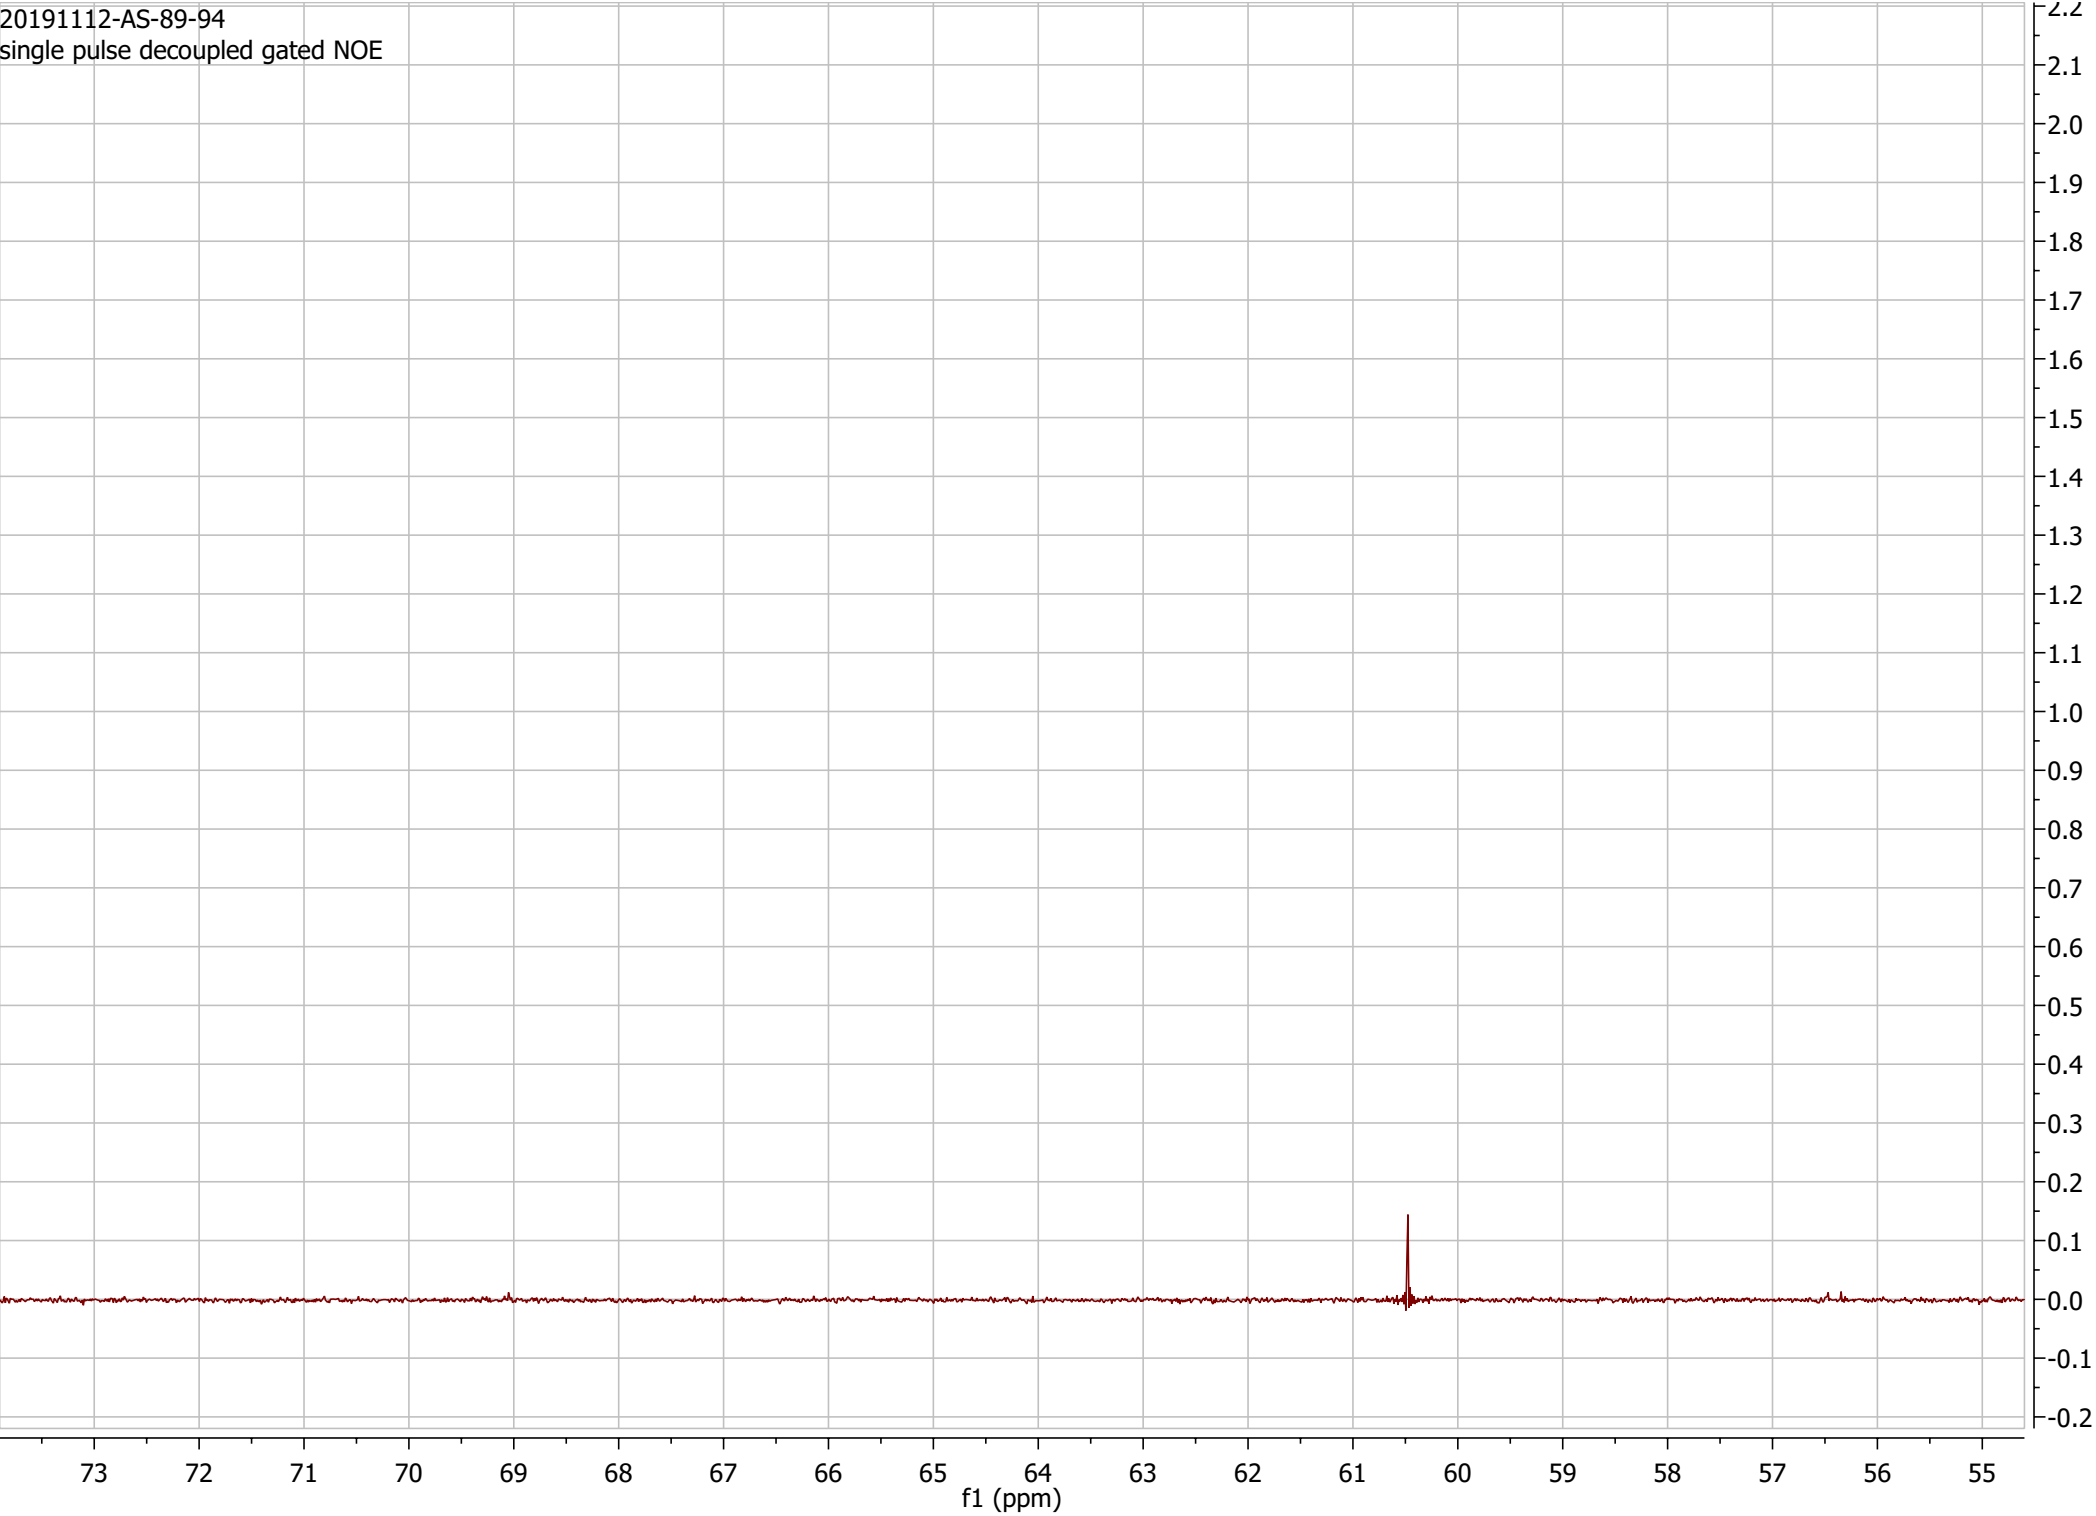

20191112-AS-89-94  
single pulse decoupled gated NOE

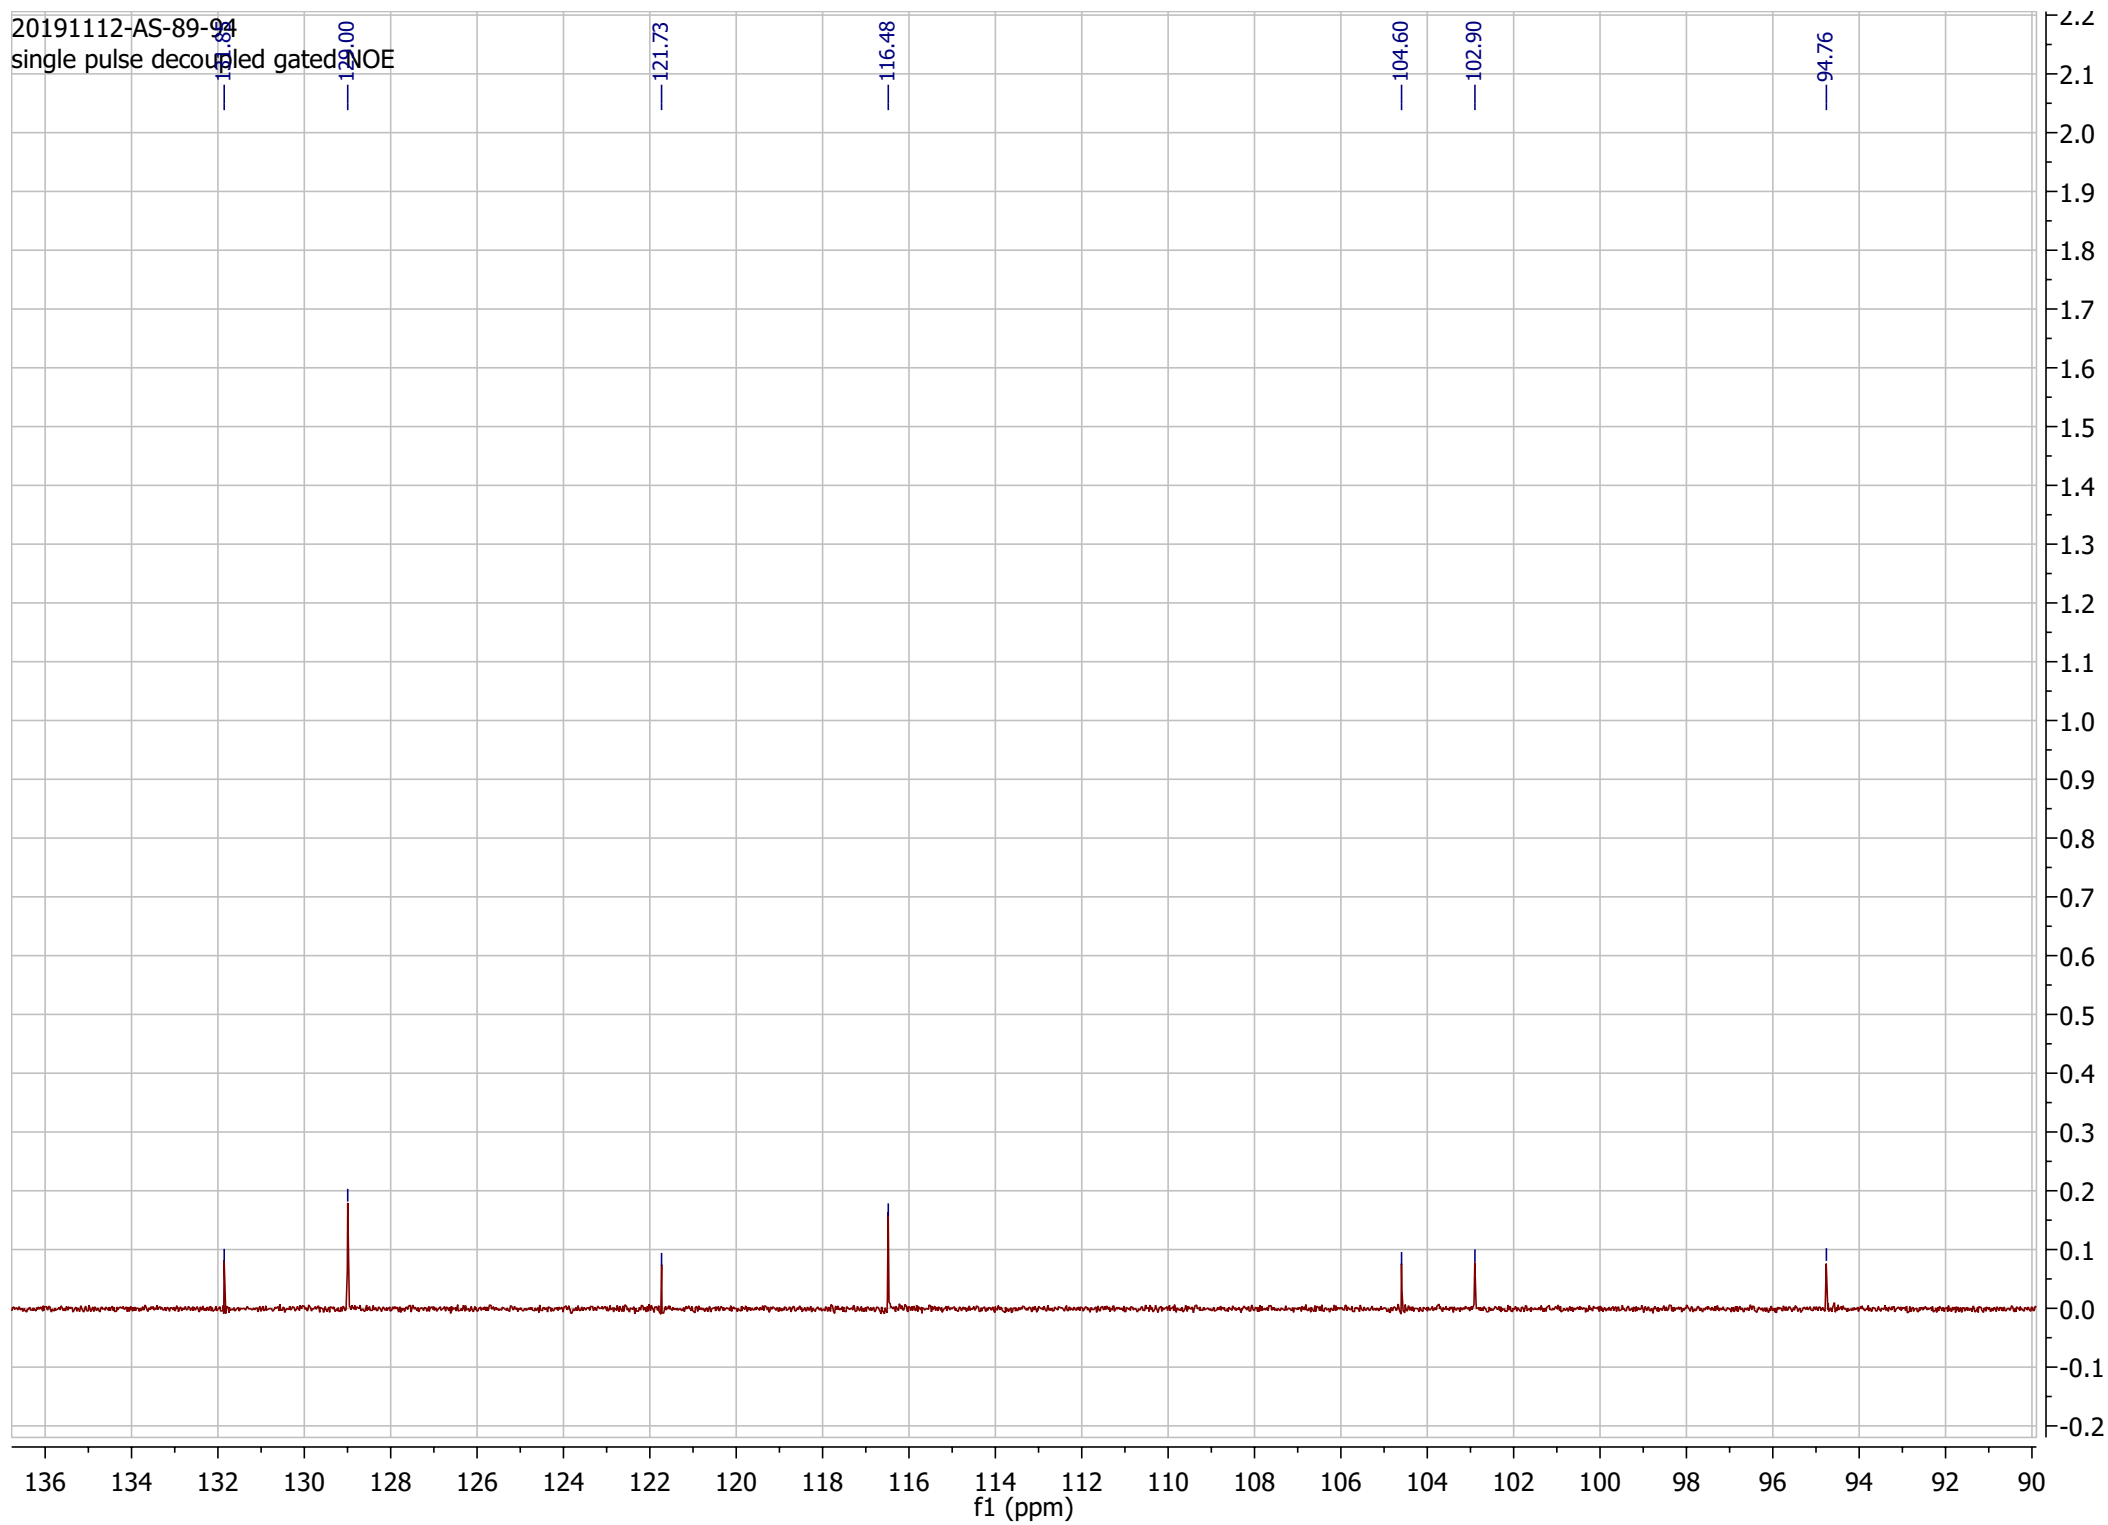

20191112-AS-89-94  
single pulse decoupled gated NOE

compound-4-carbon

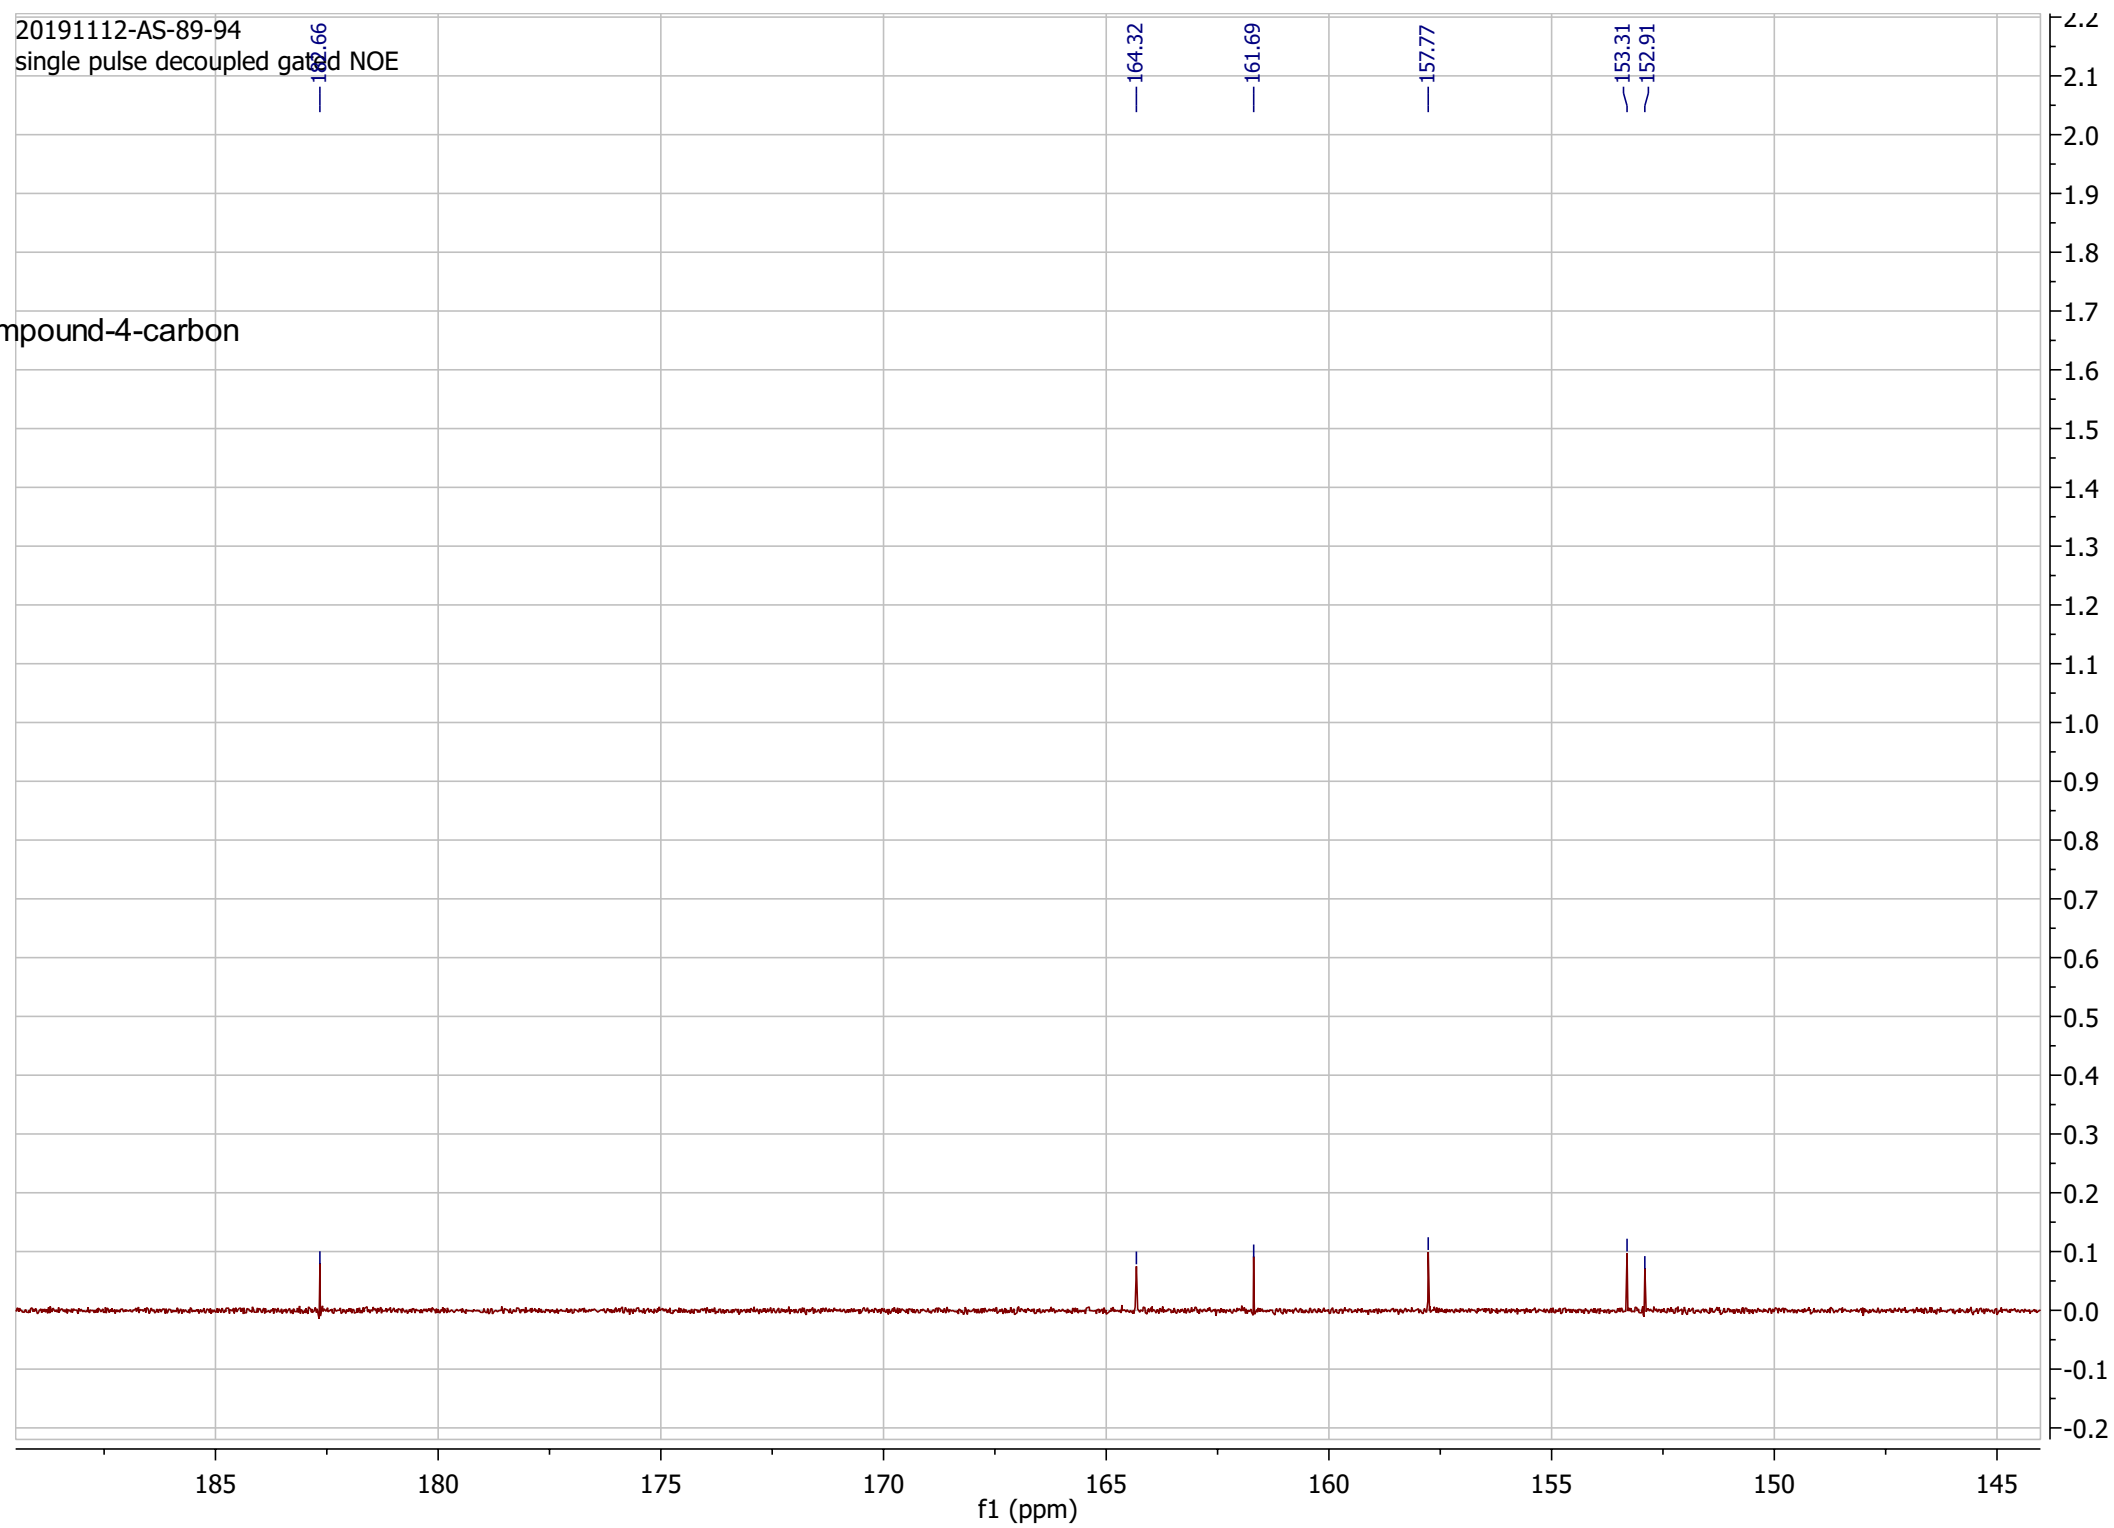



20191128-AS-155-166  
single\_pulse

Compound -5-proton

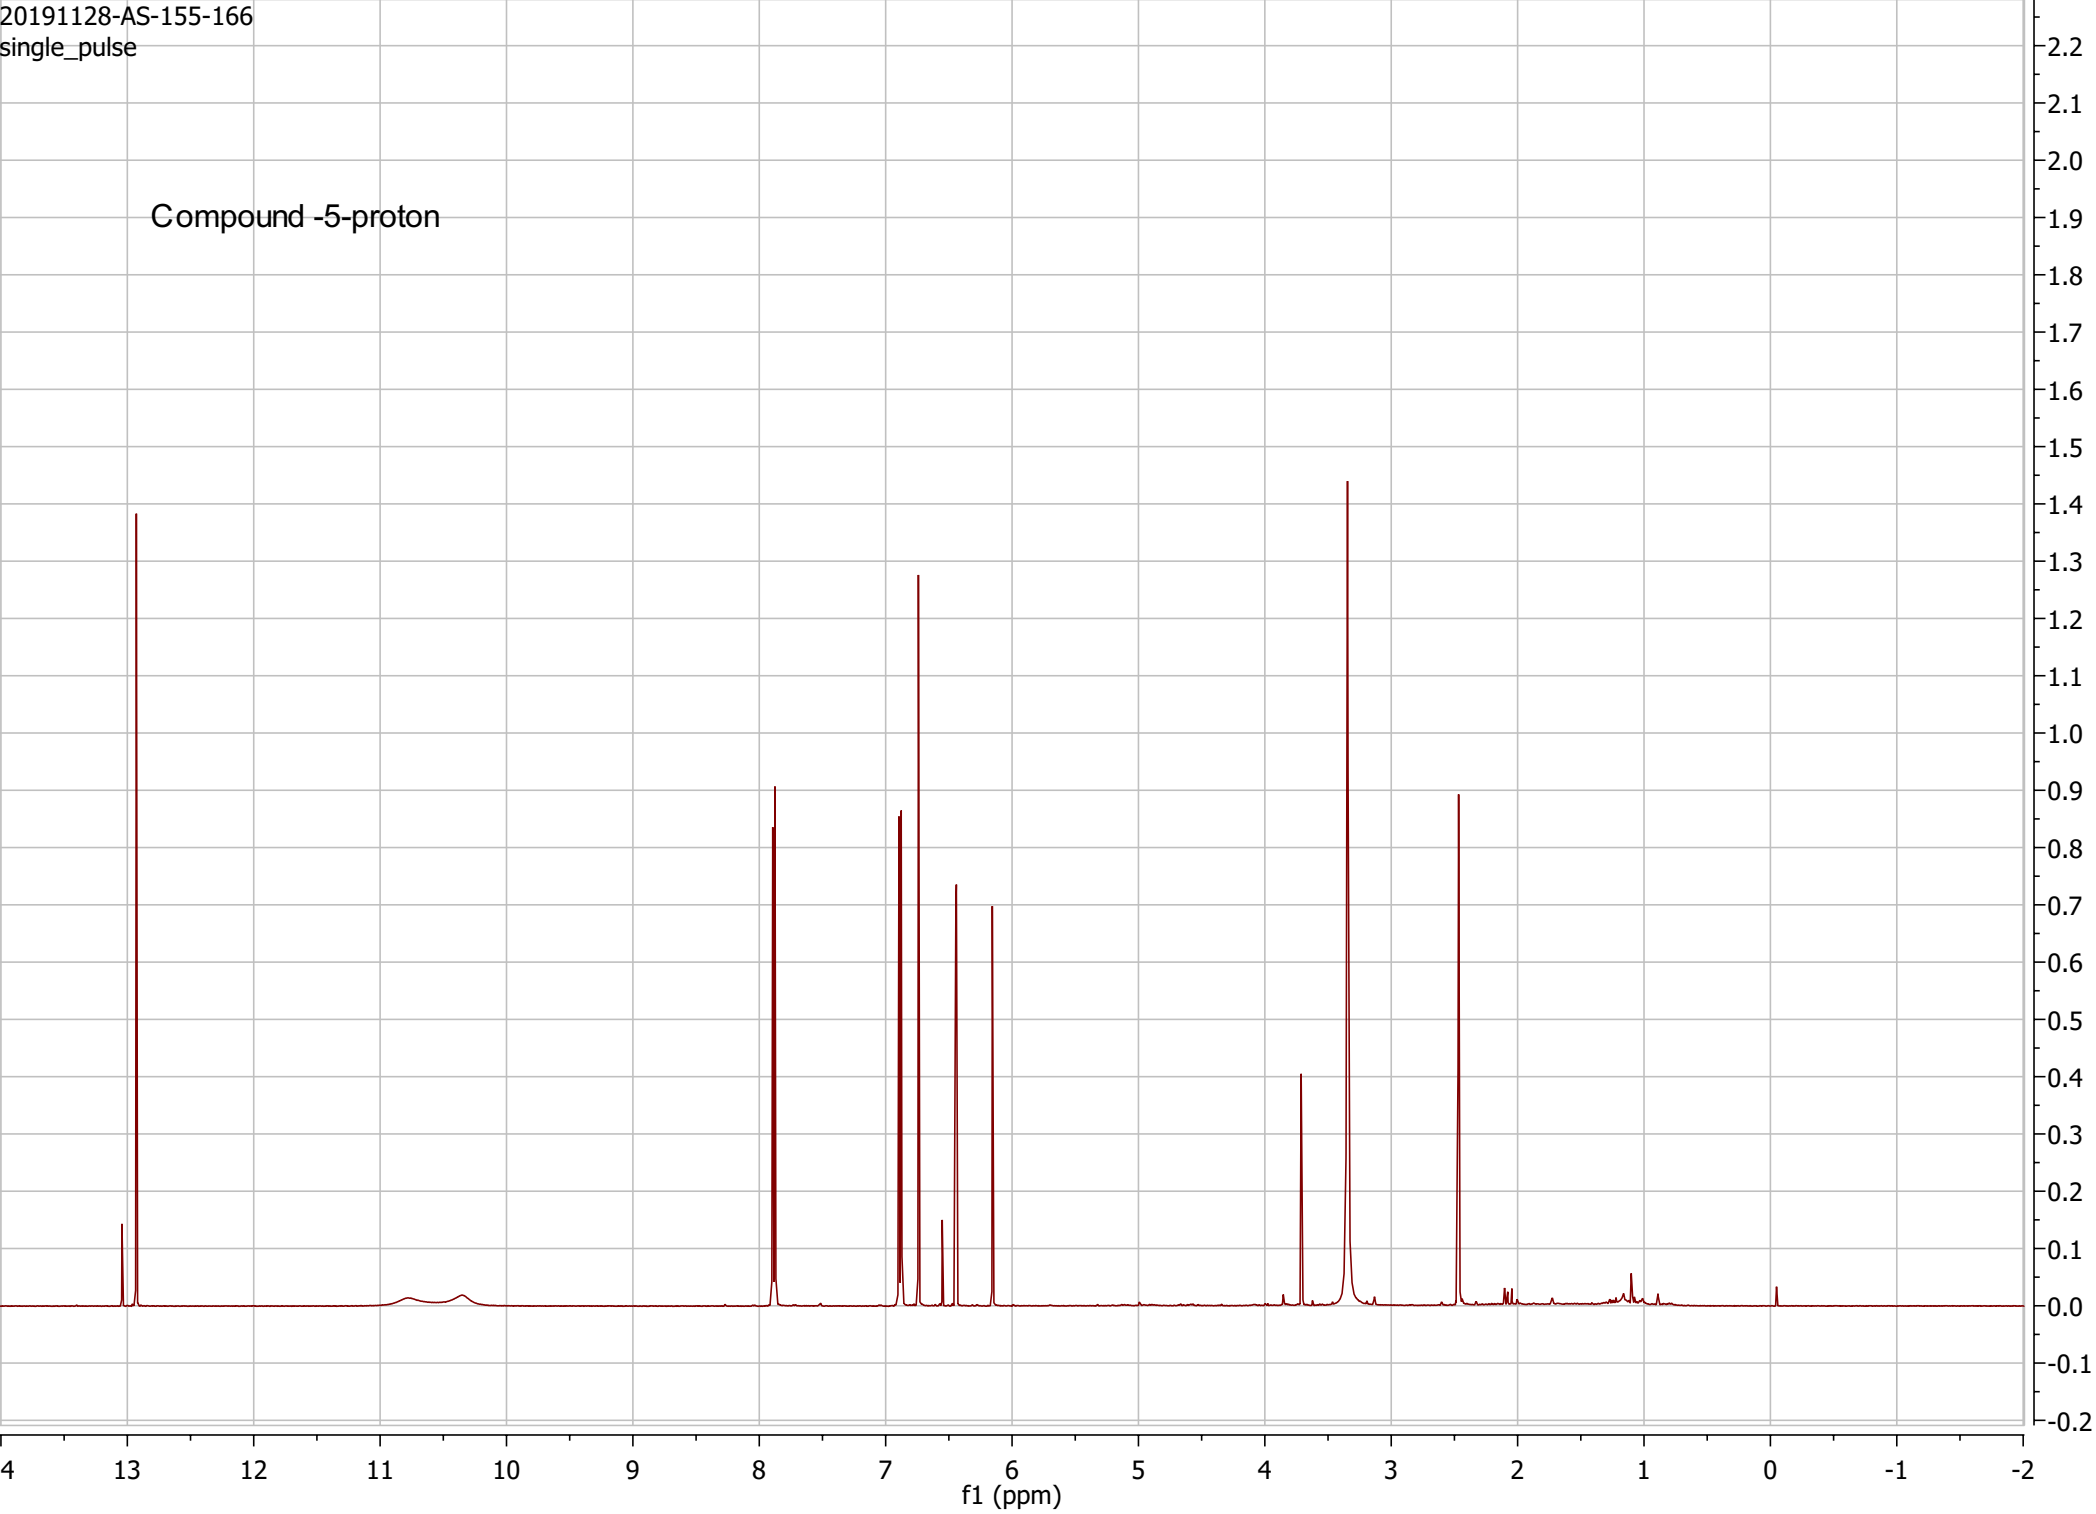

20191128-AS-155-166  
single\_pulse

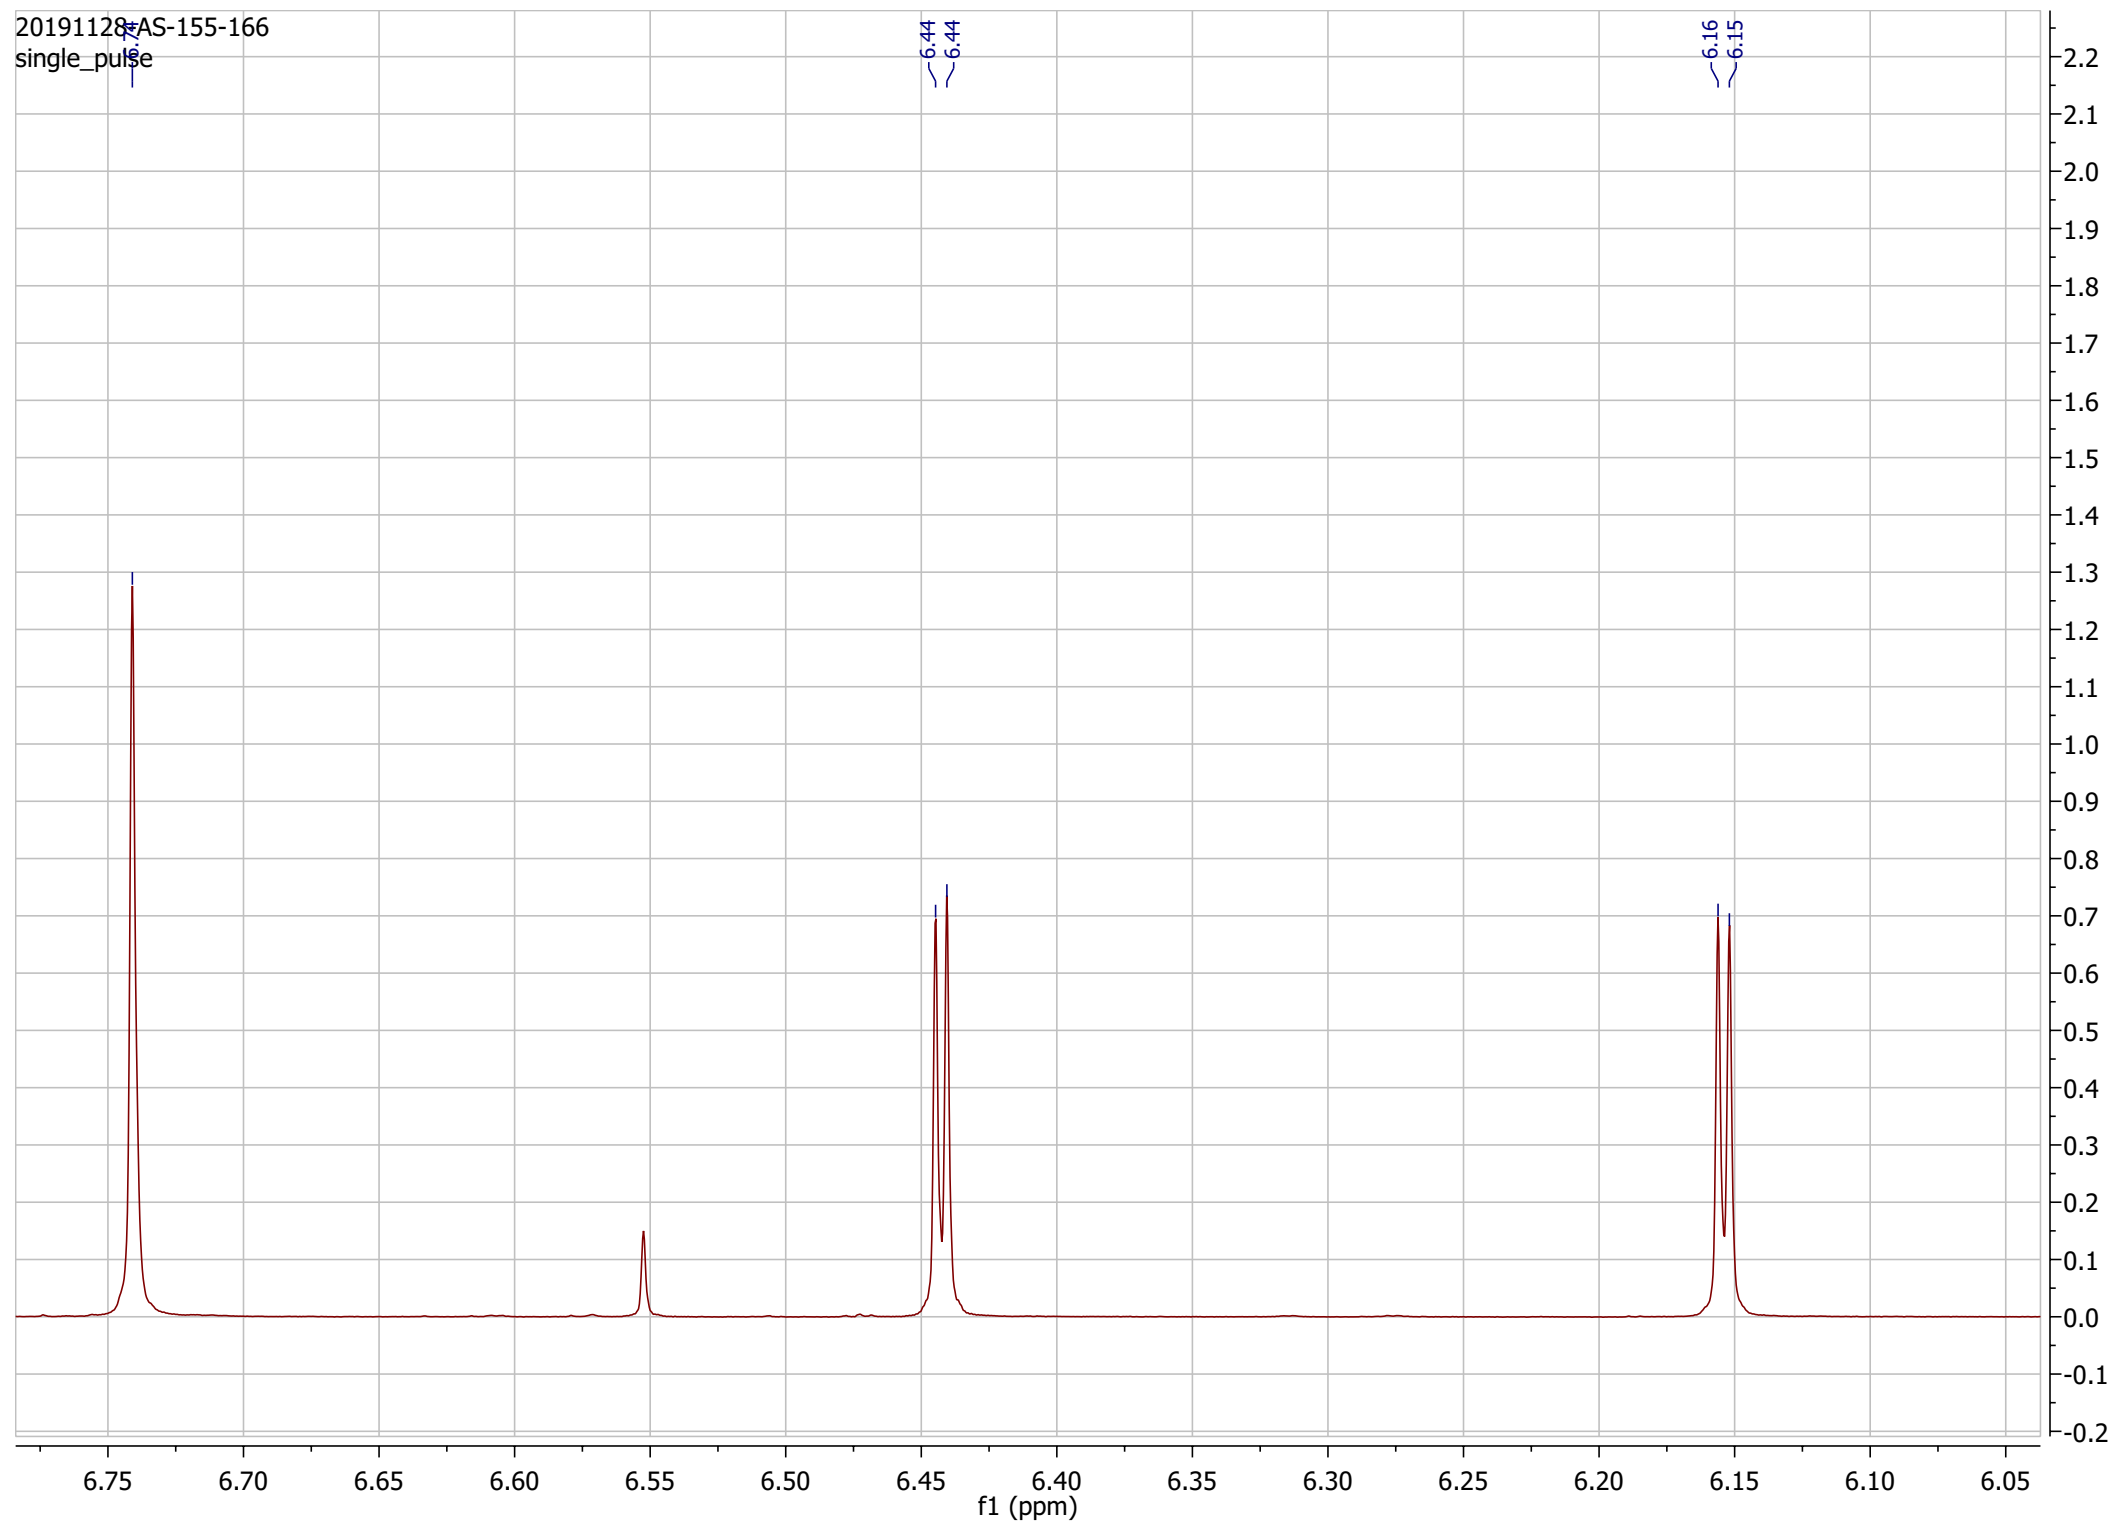

20191128-AS-155-166  
single\_pulse

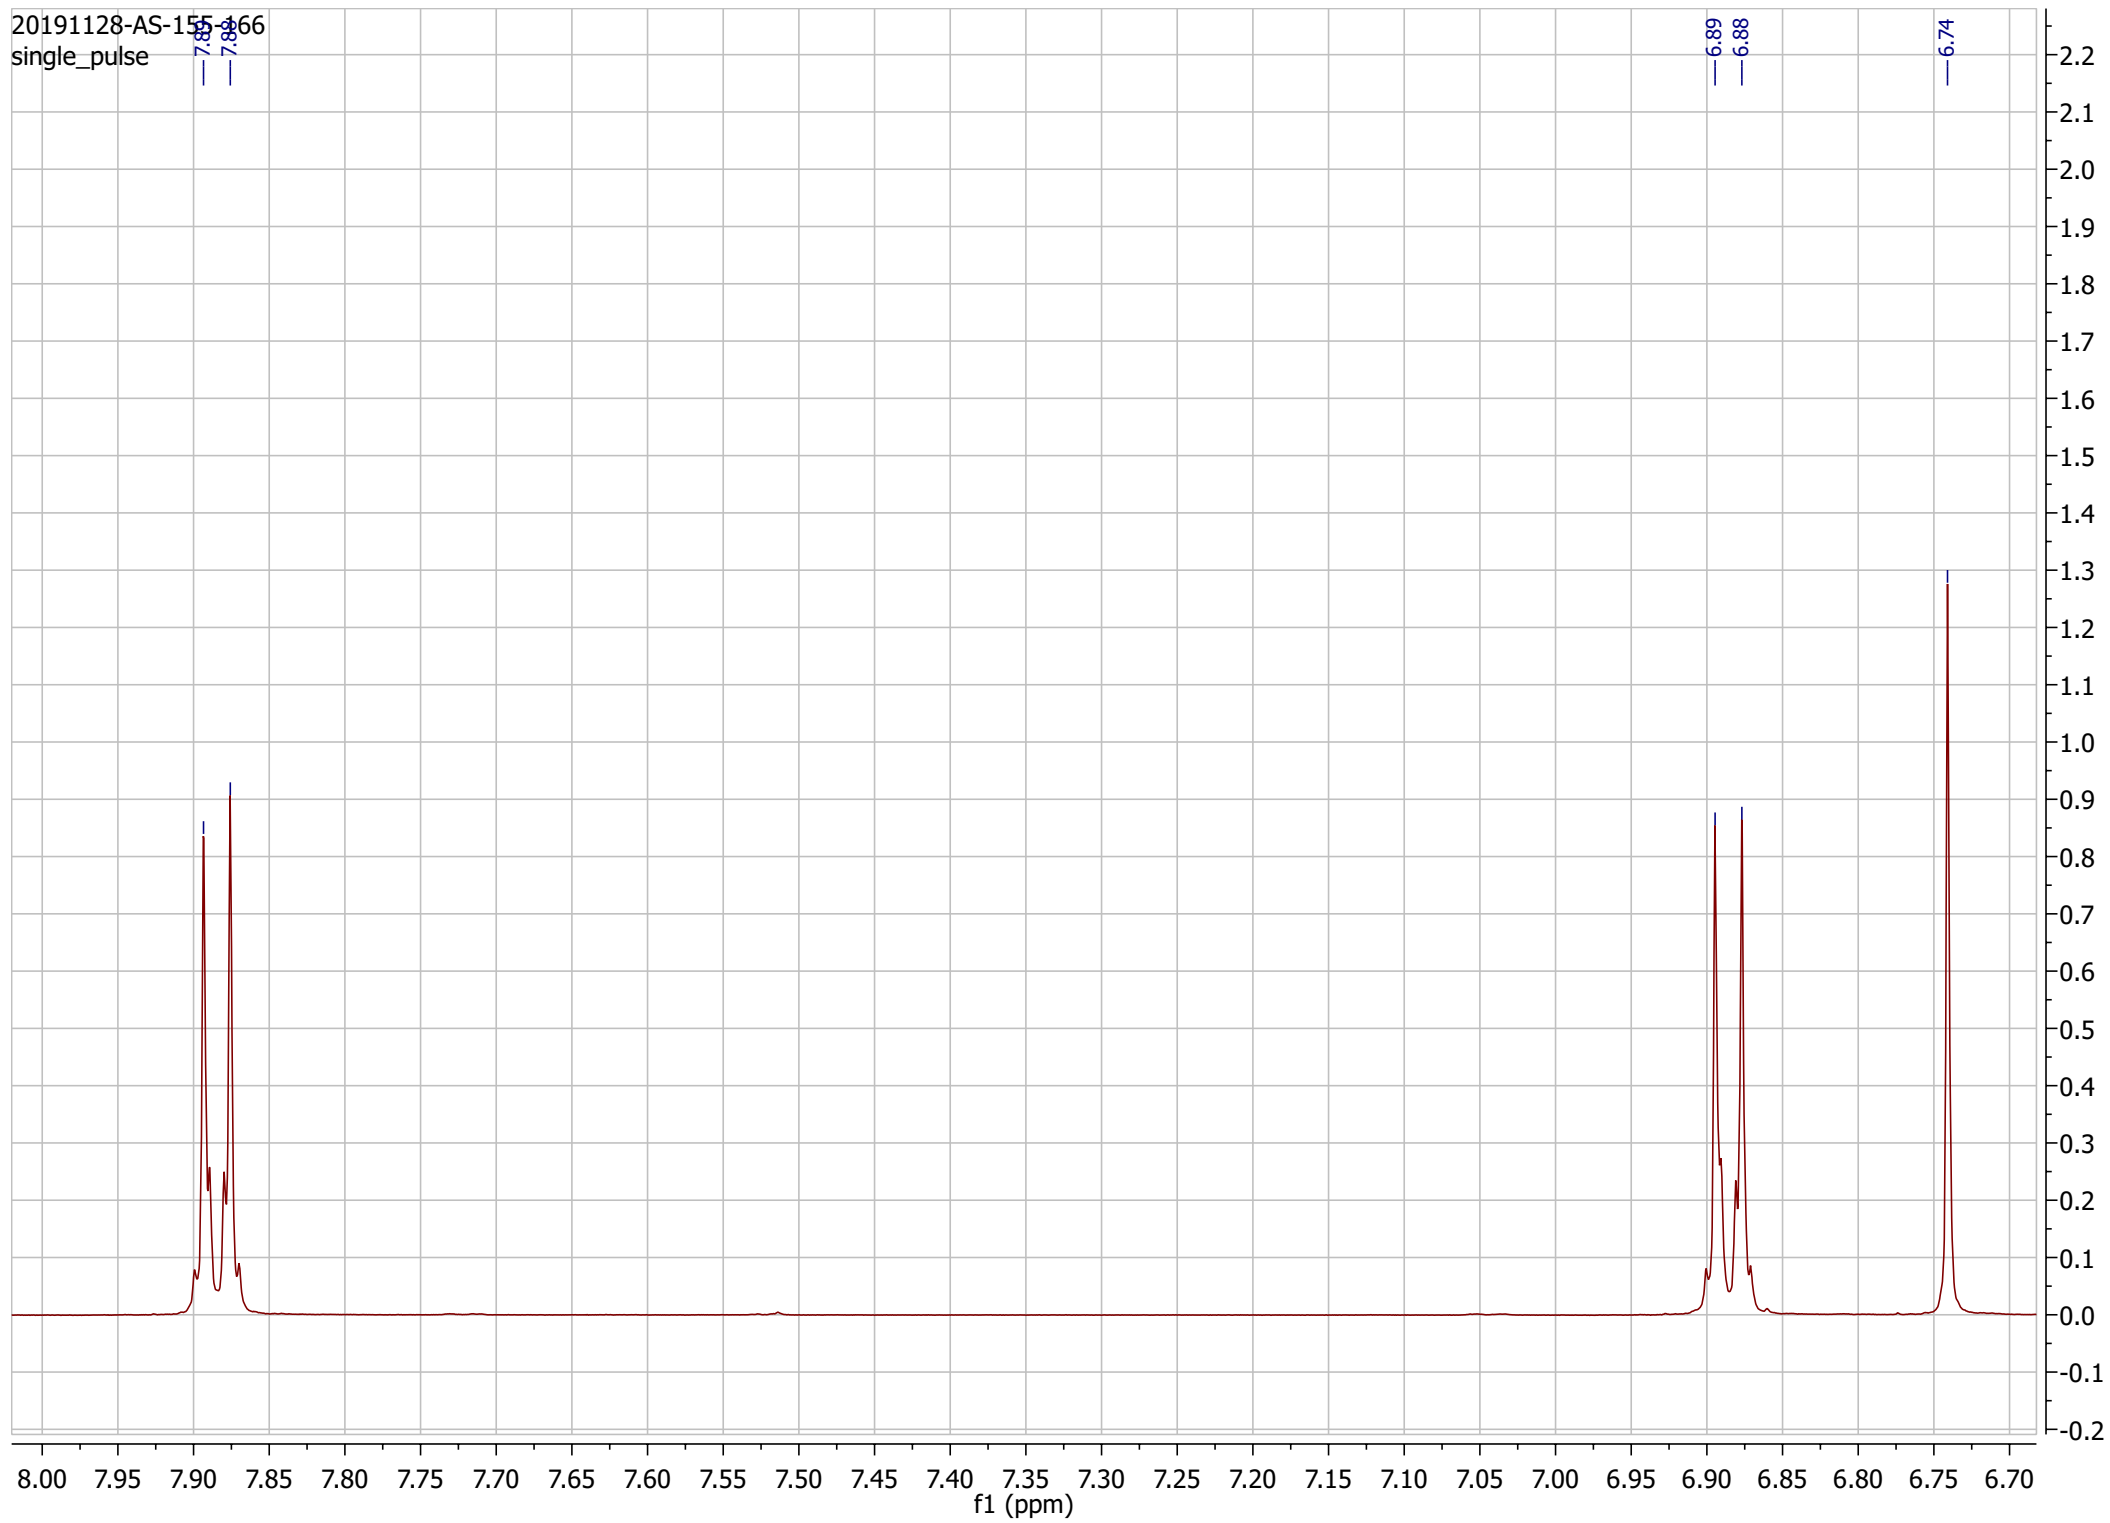

20191128-AS-155-166  
single\_pulse

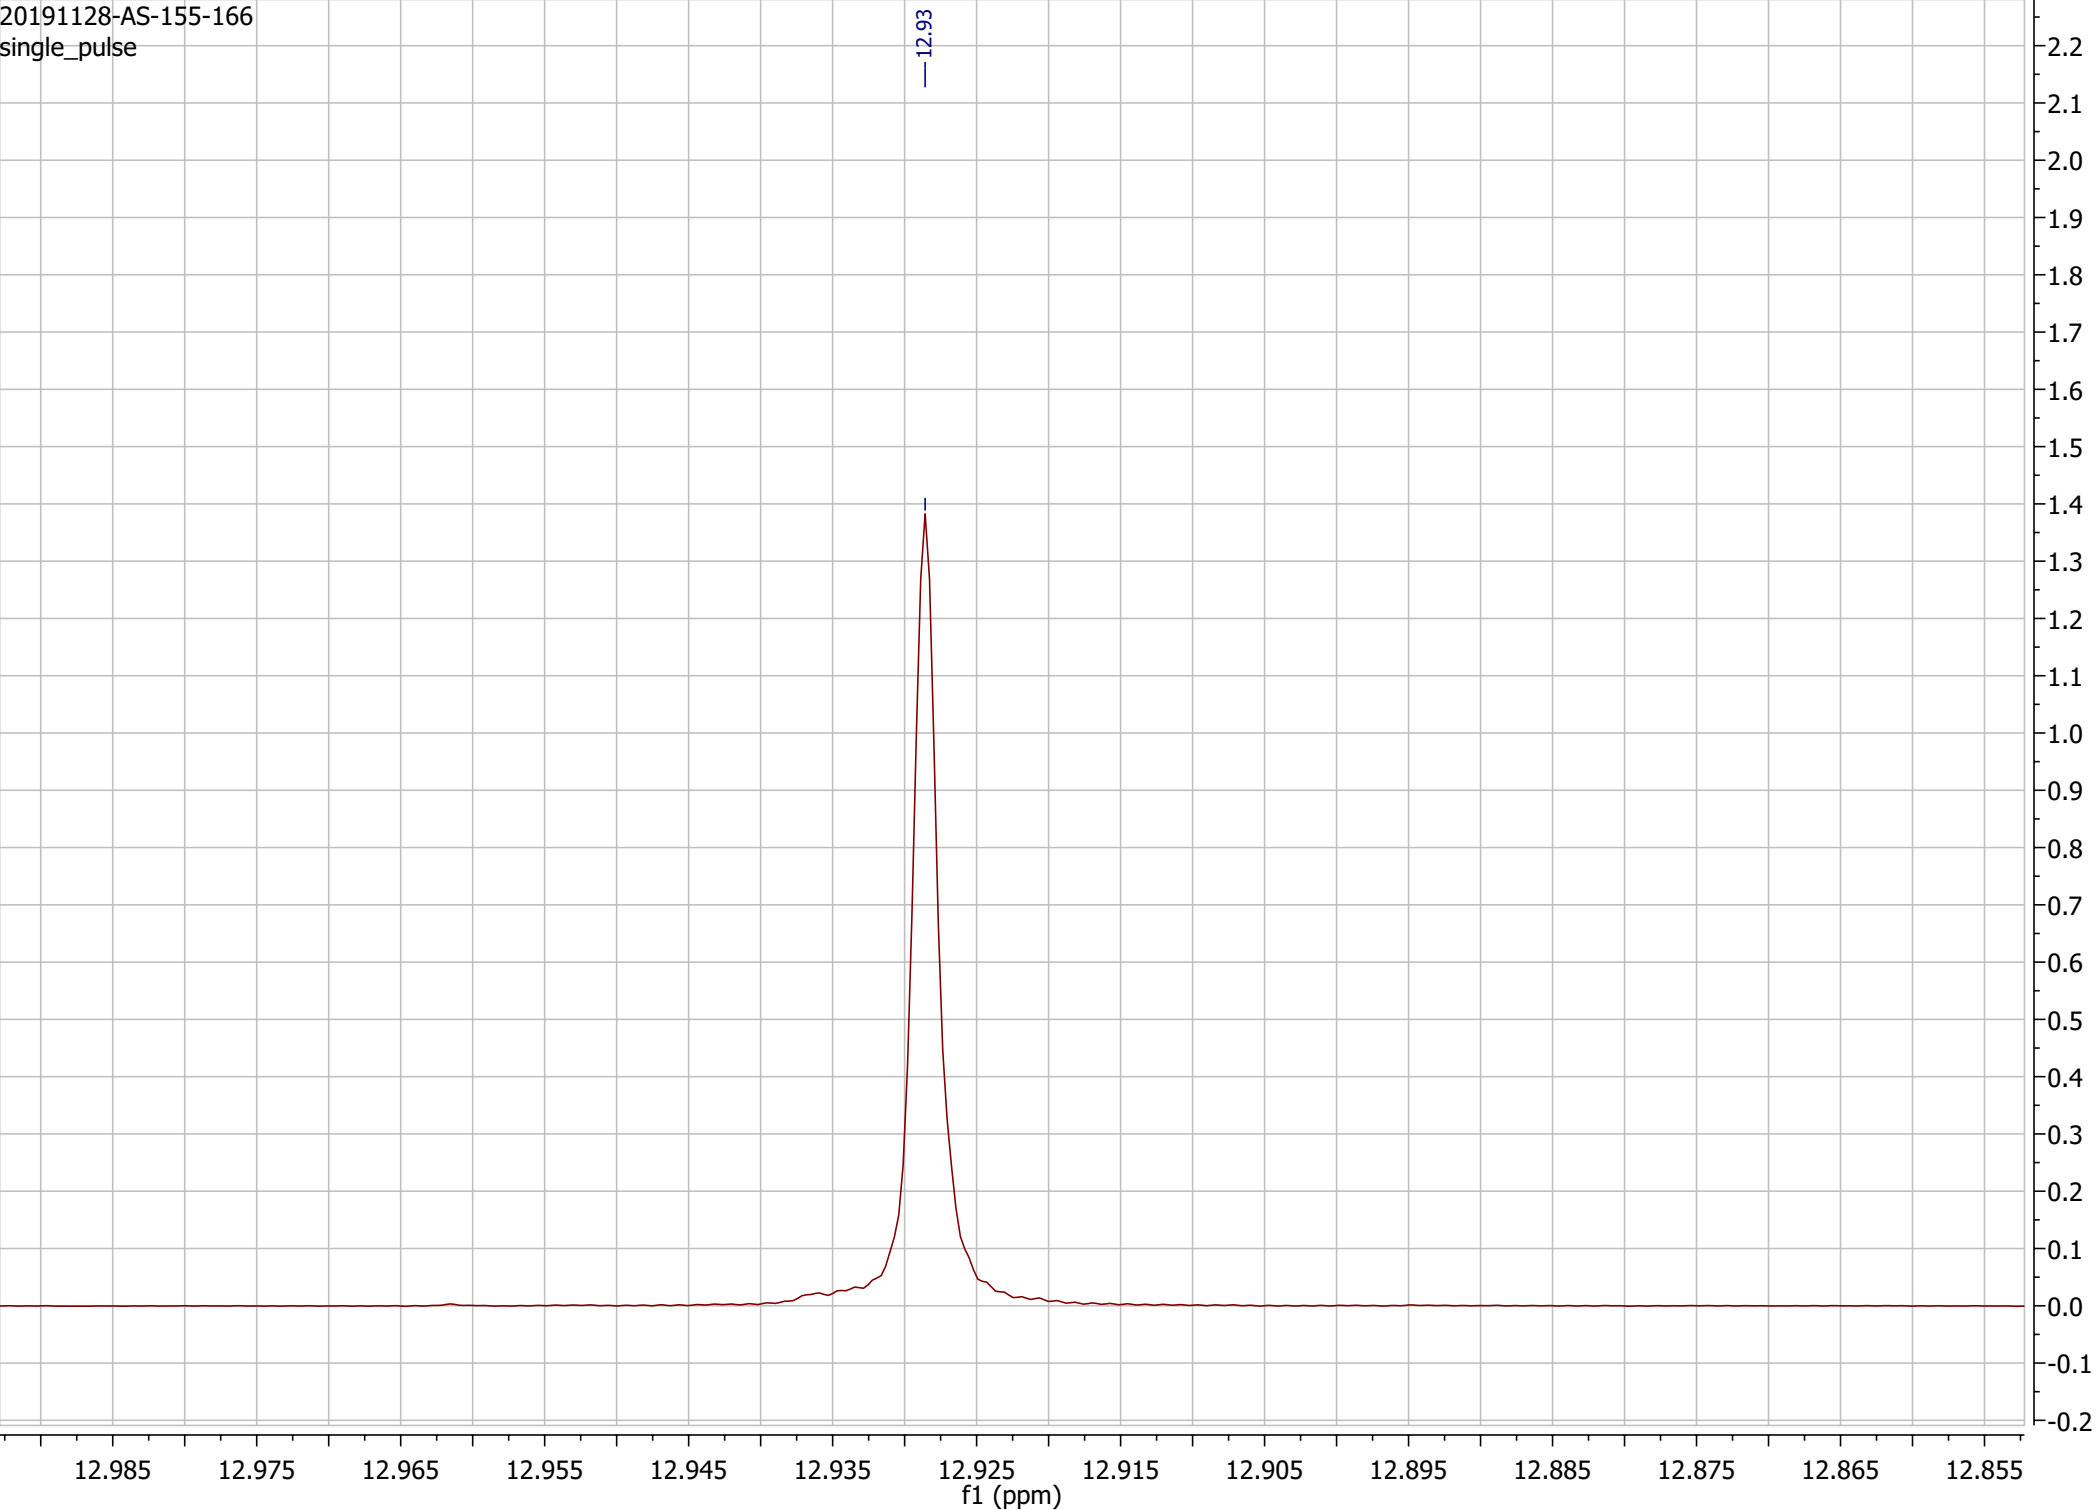

20191212\_AS-155-166  
single pulse decoupled gated NOE

Compound -5-carbon

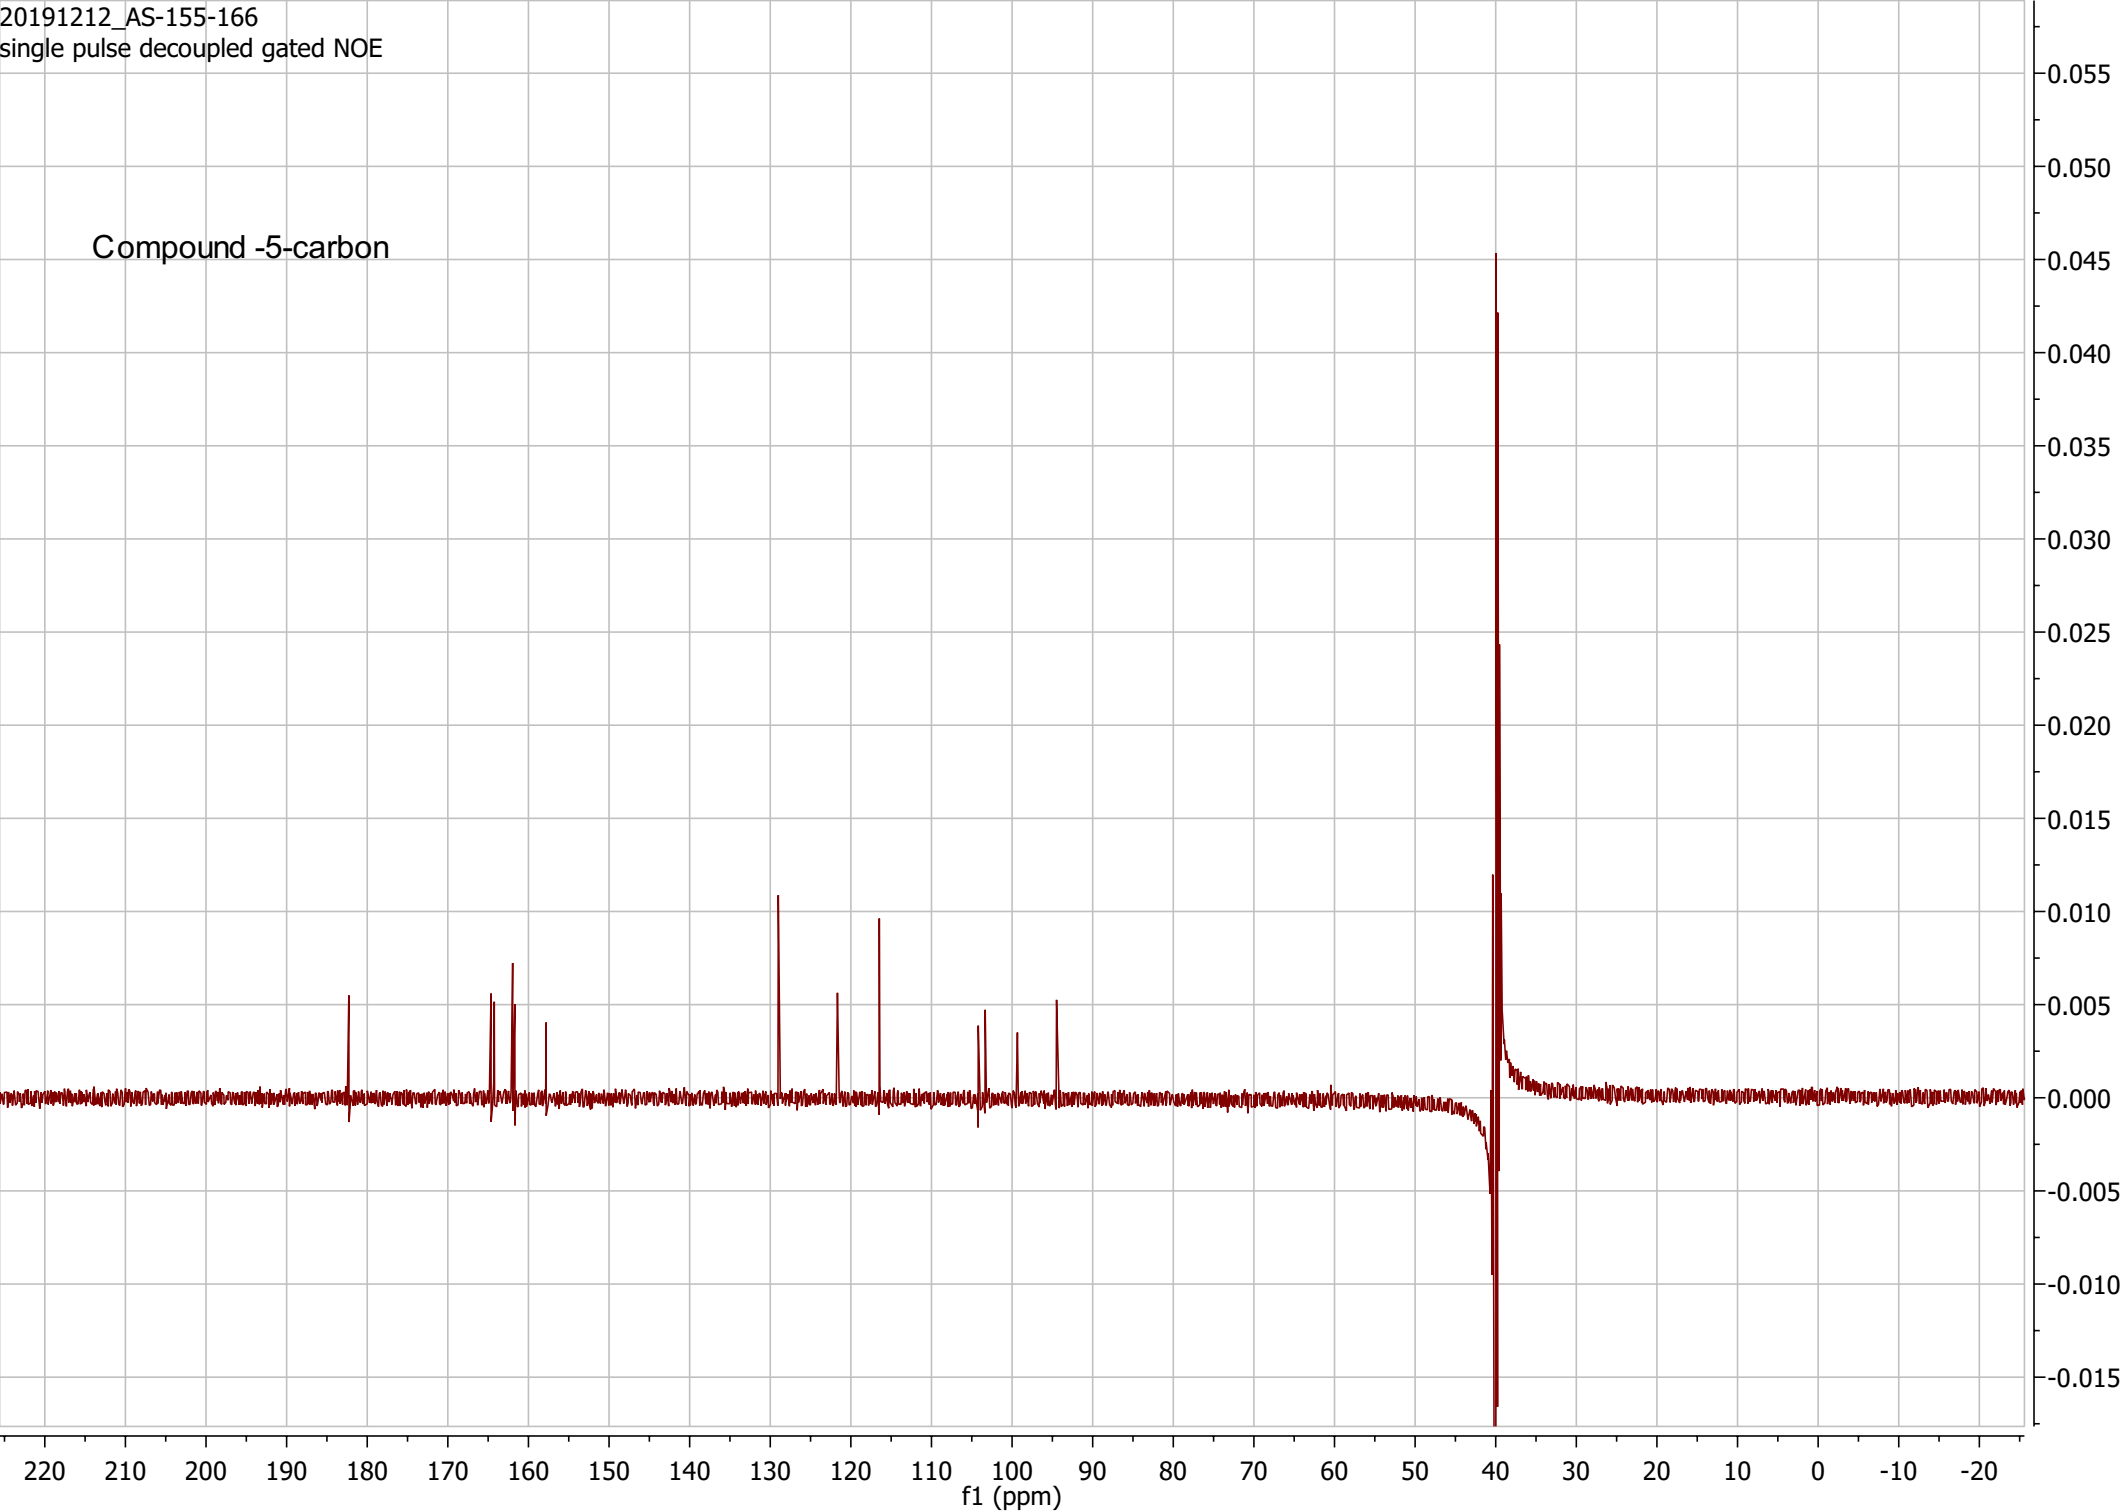

20191212\_AS-155-166  
single pulse decoupled gated NOE

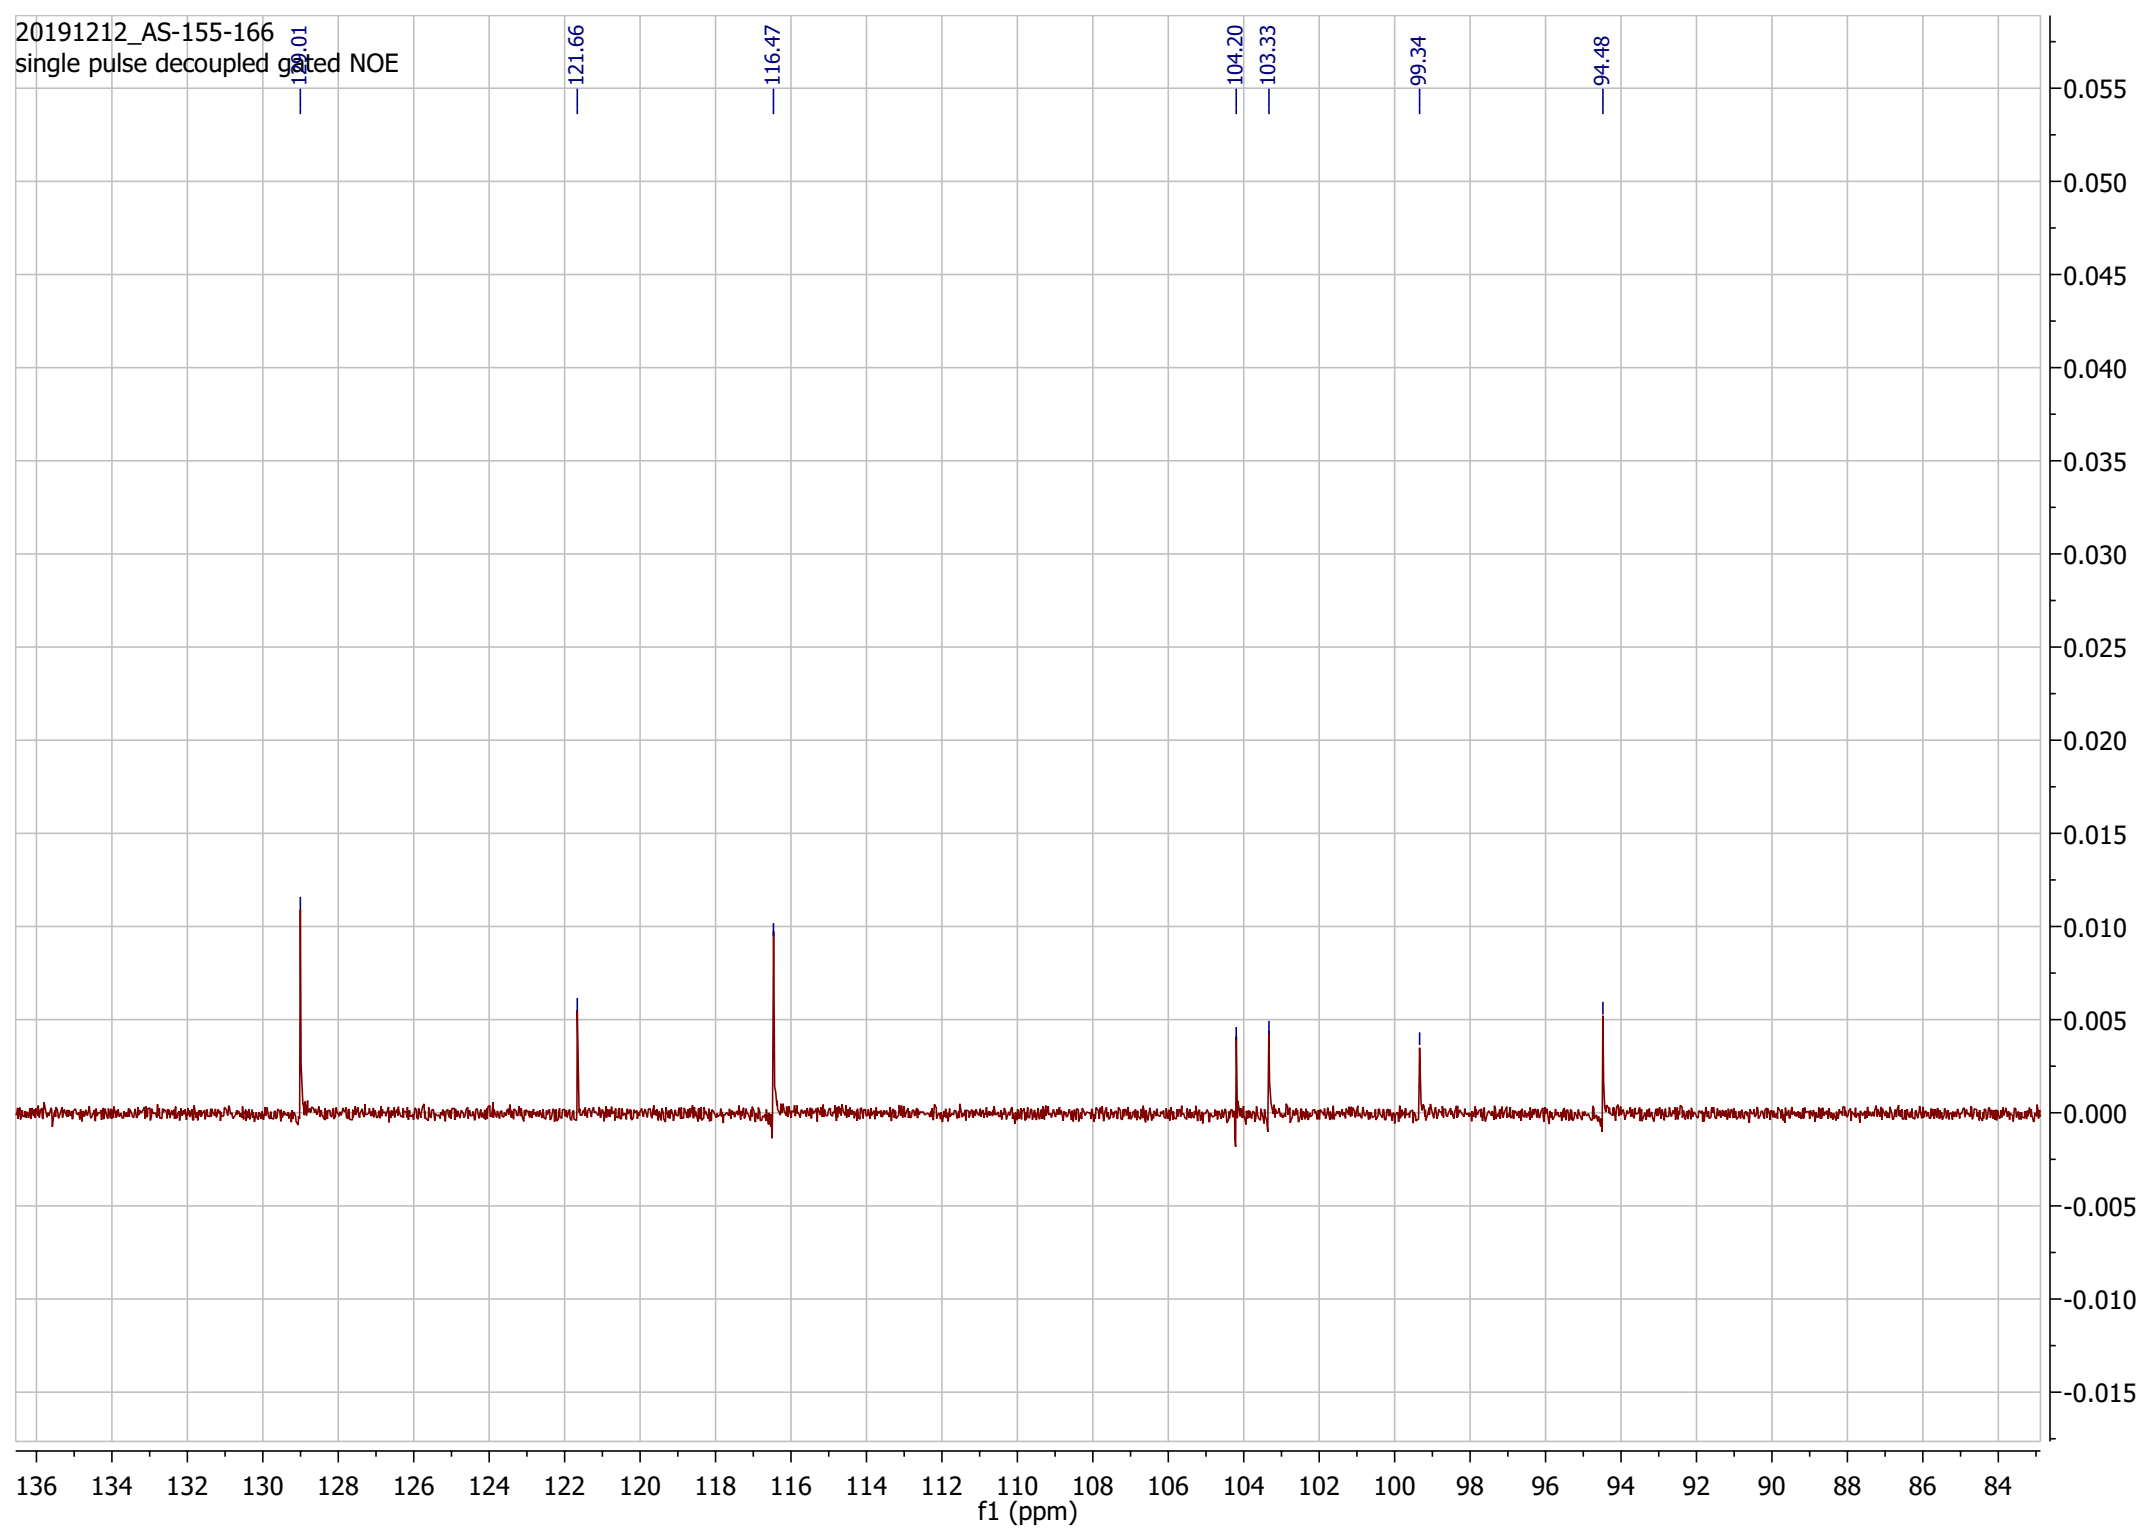

20191212\_AS-155-166

single pulse decoupled gated NOE

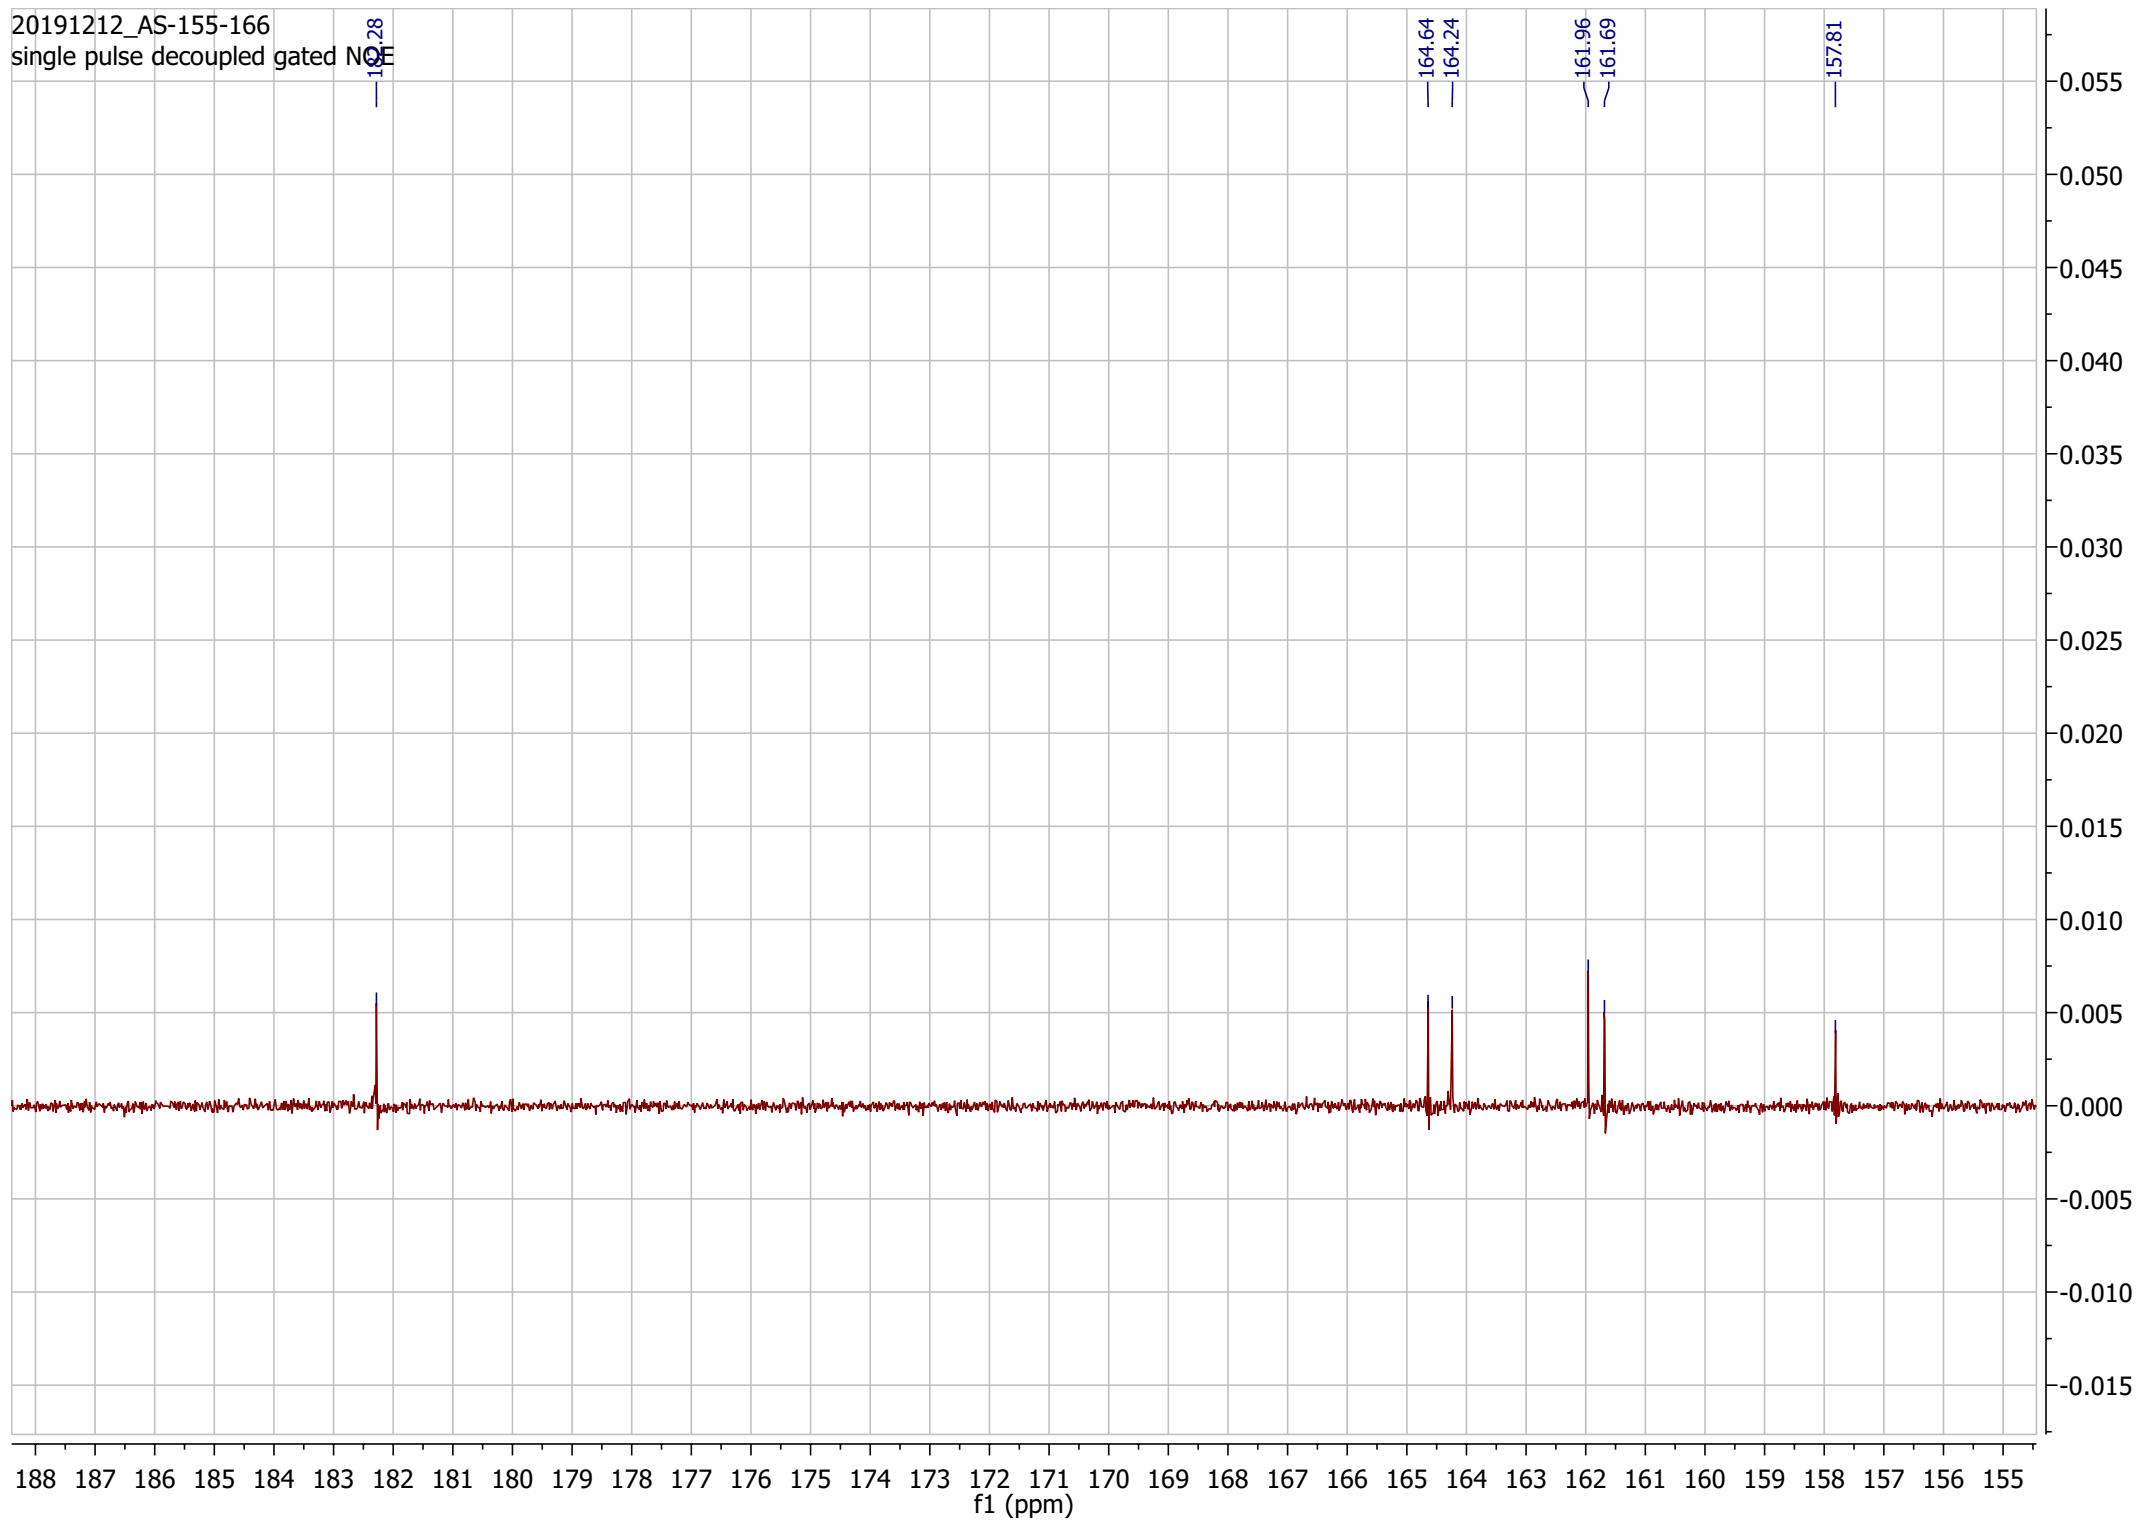

20200116\_AS-55-60-1  
single\_pulse

Compound-6-proton

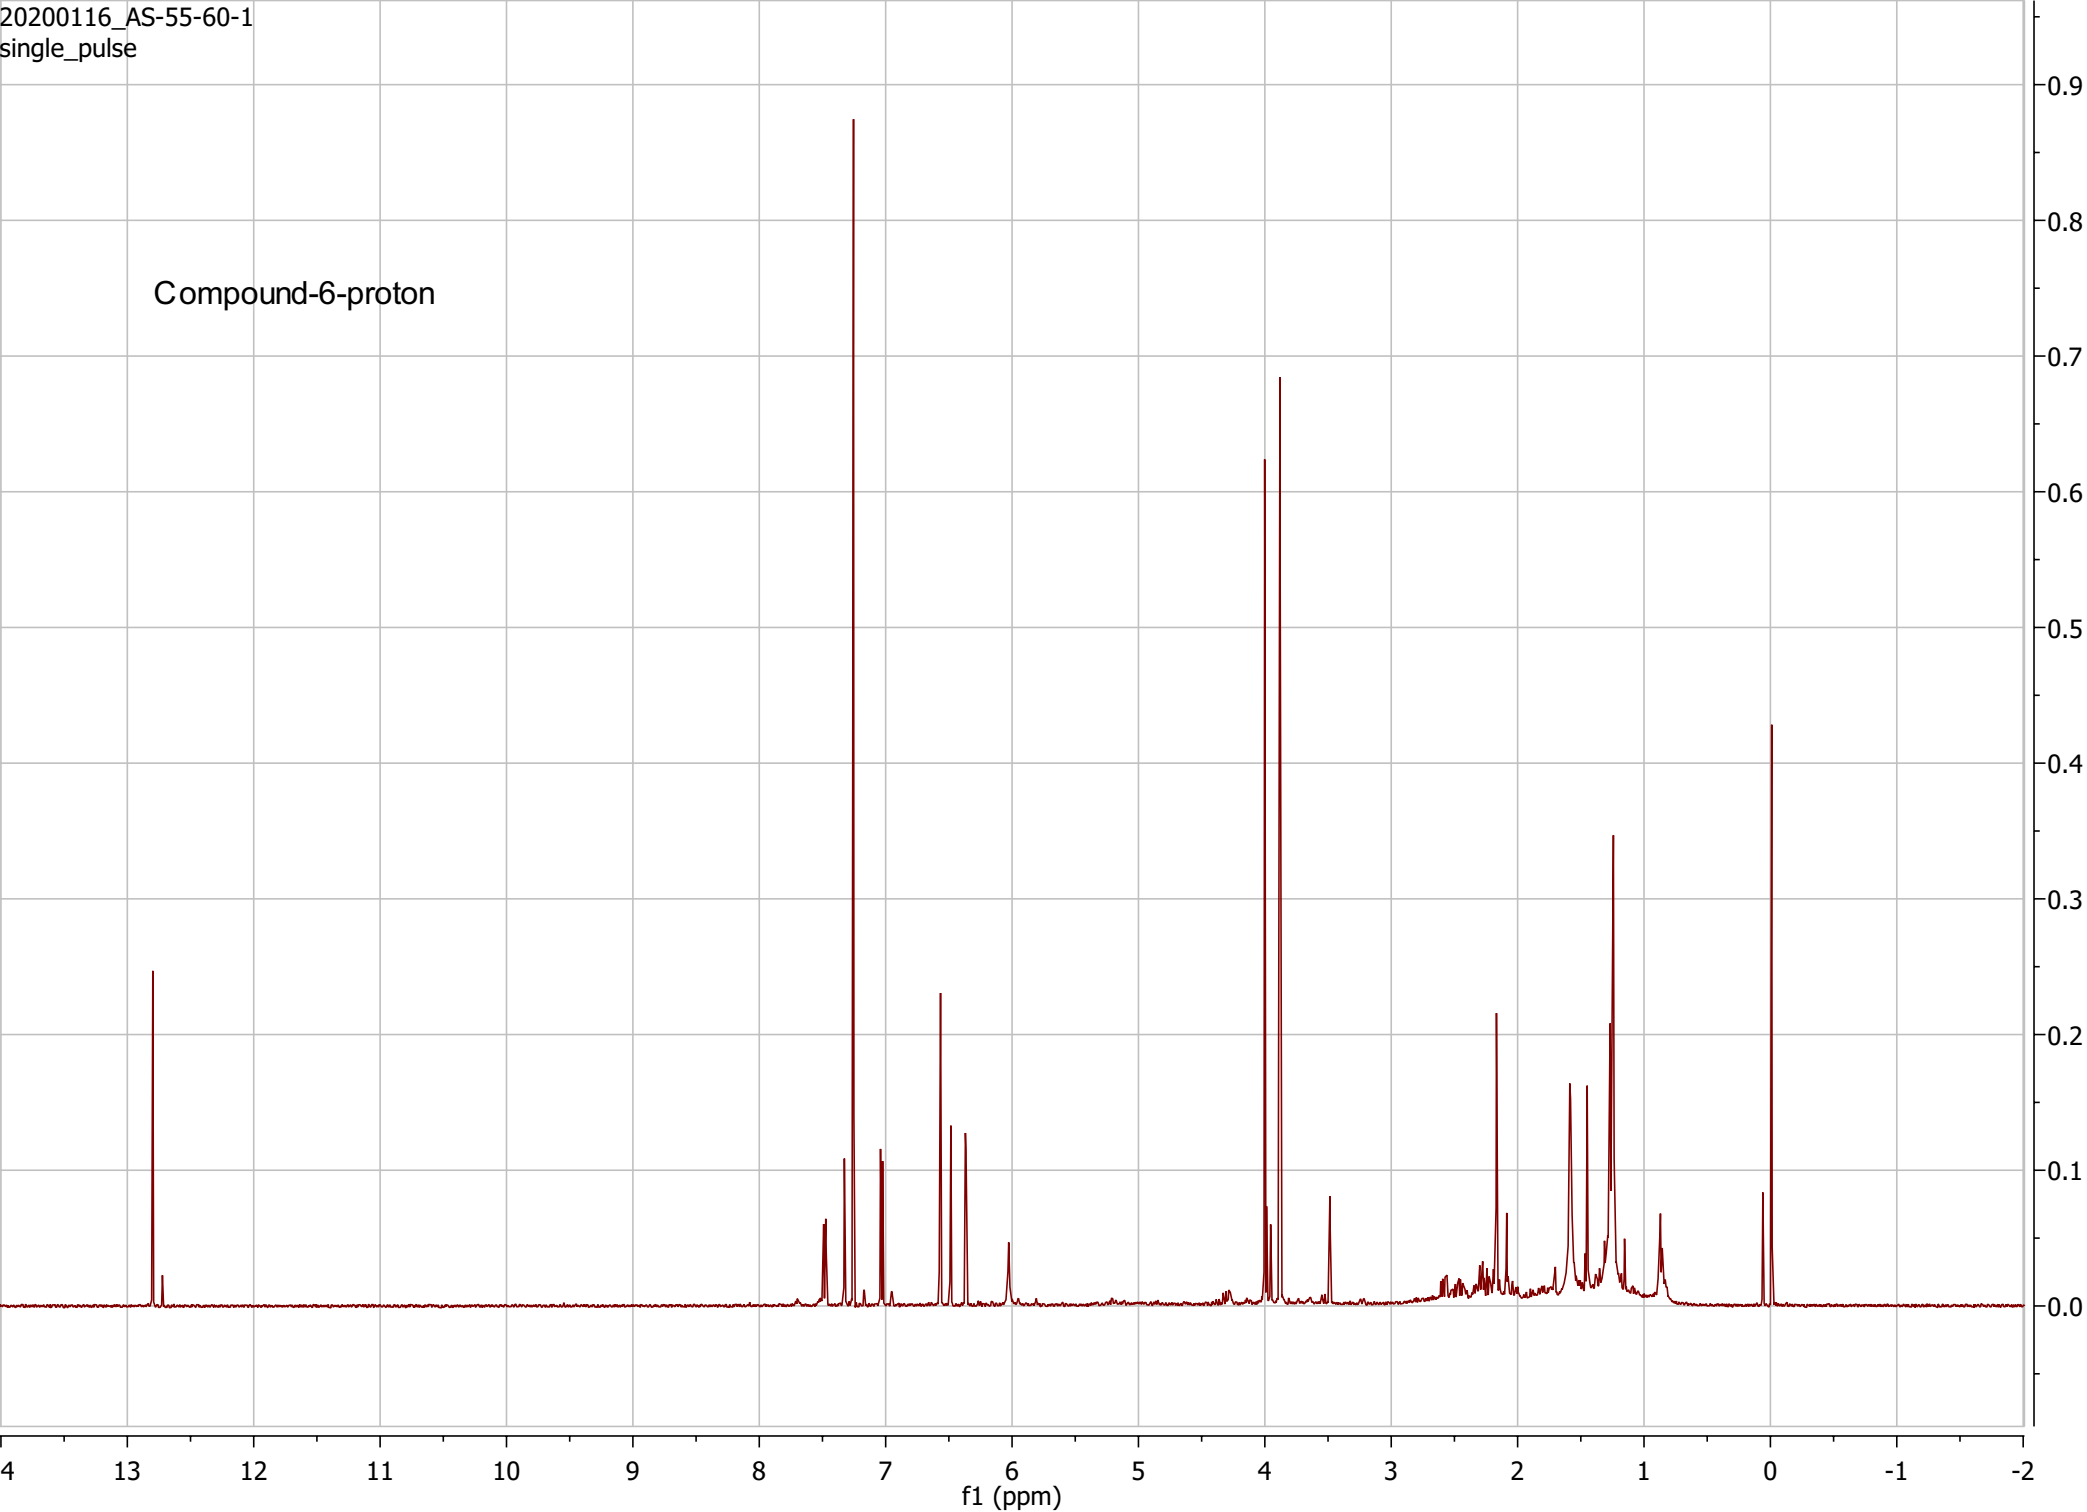



20200116\_AS-55-60-1  
single\_pulse

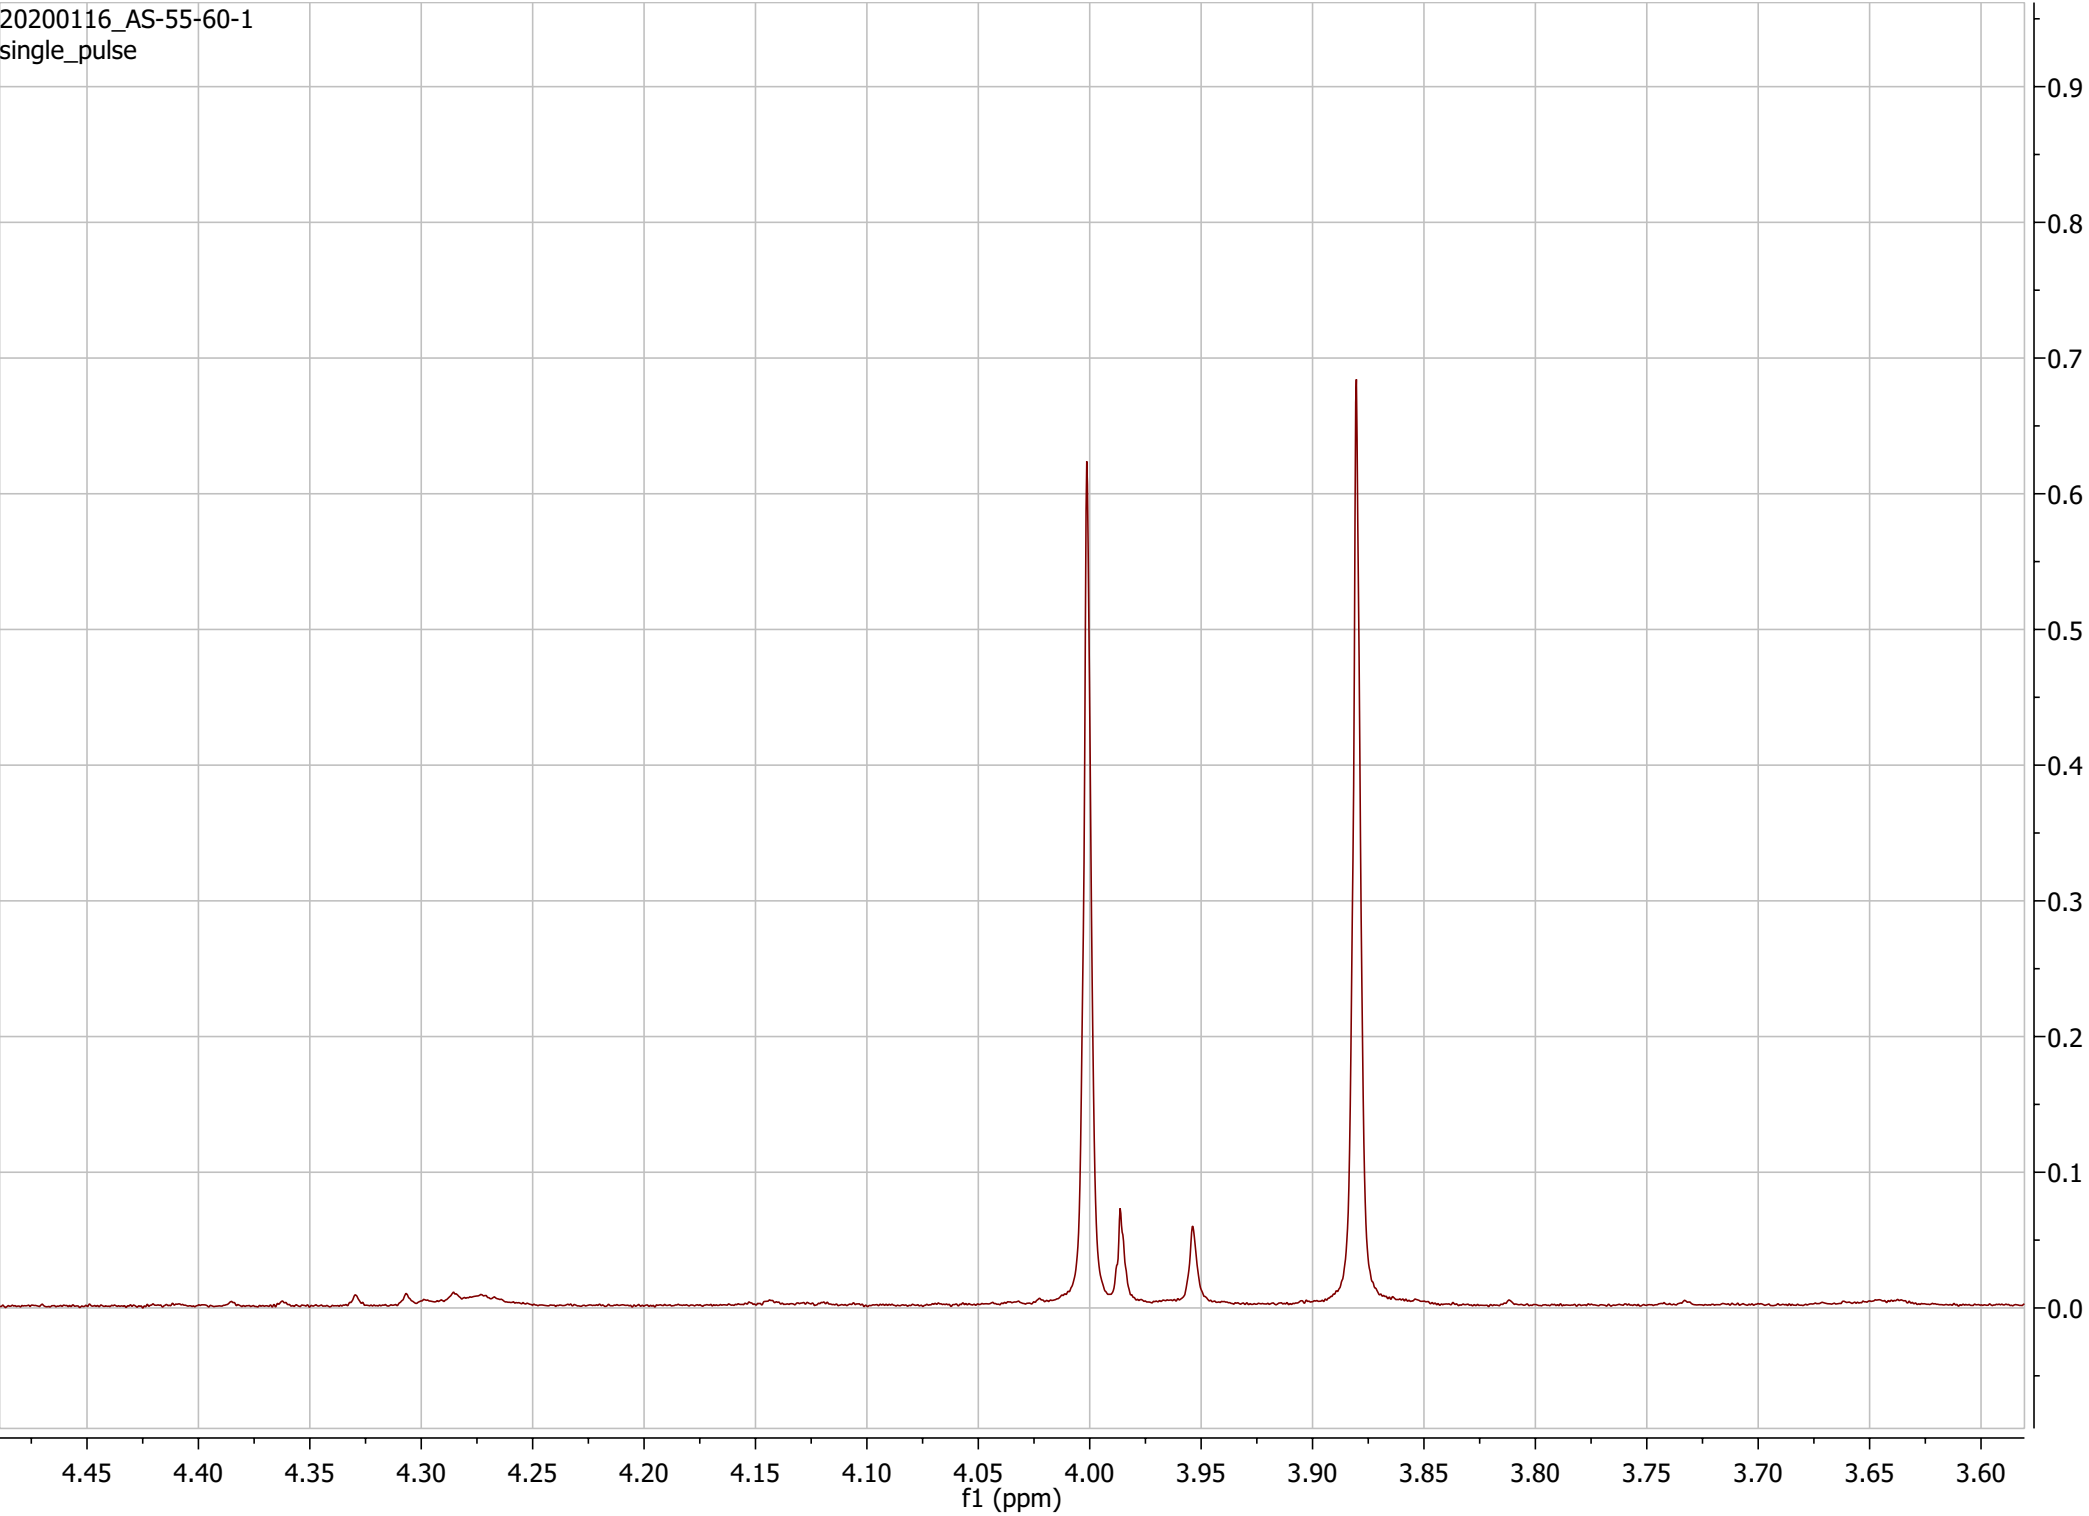

20200116\_455560-1  
single\_pulse

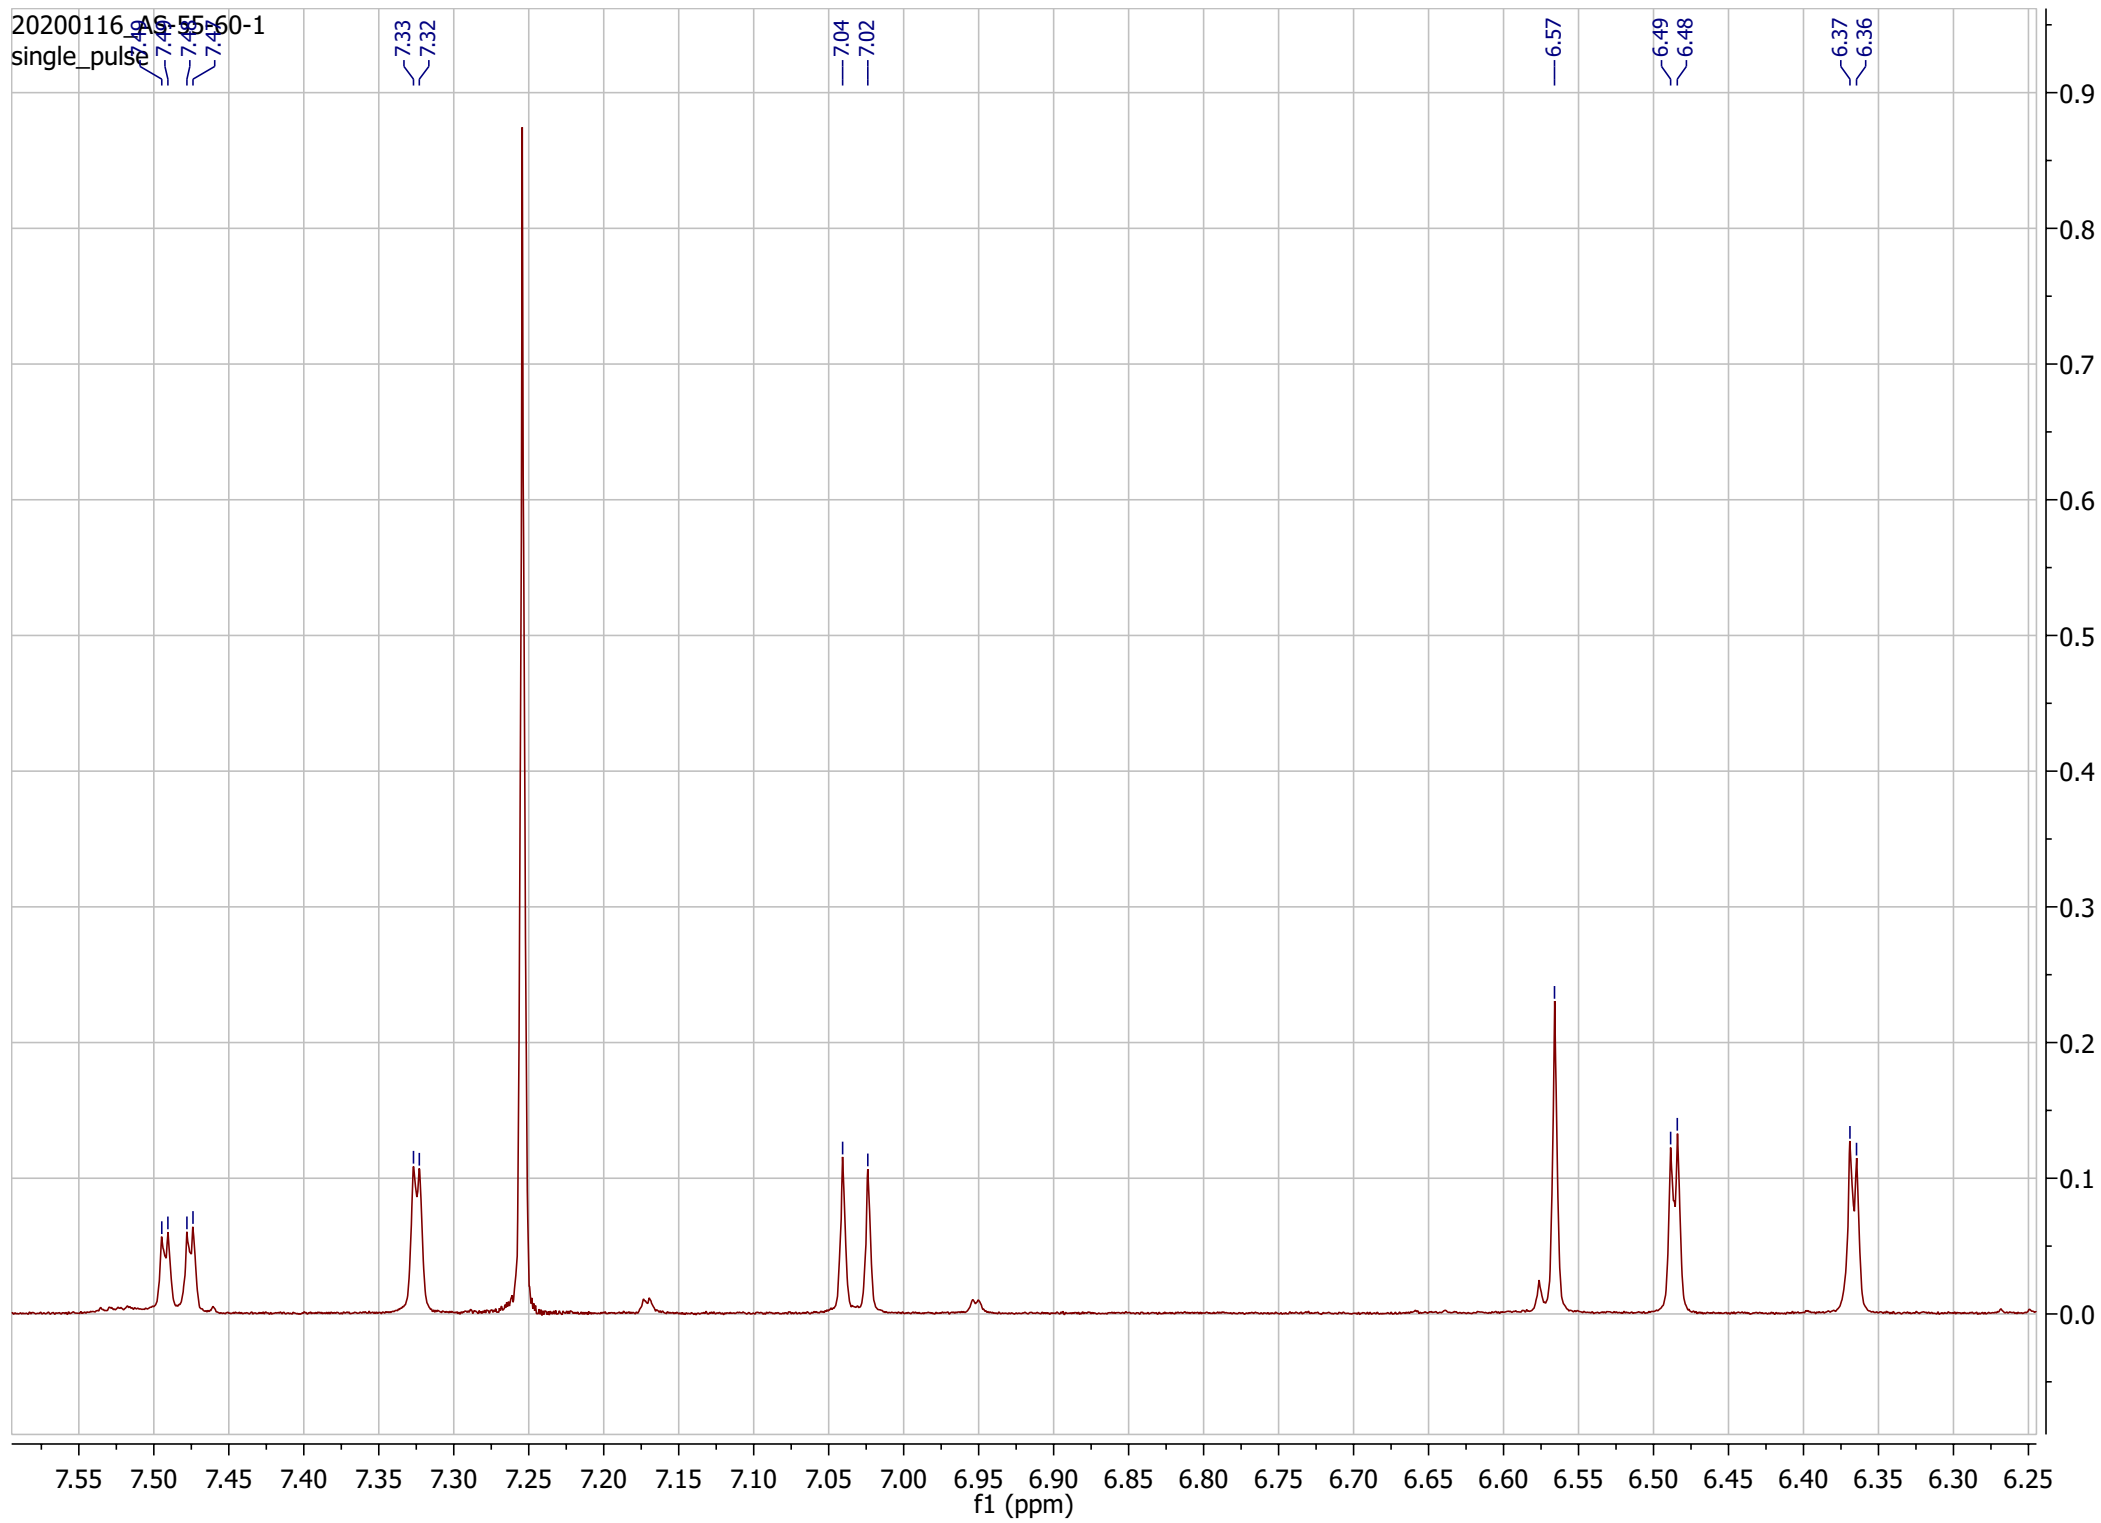

20200116\_AS-55-60-1  
single\_pulse

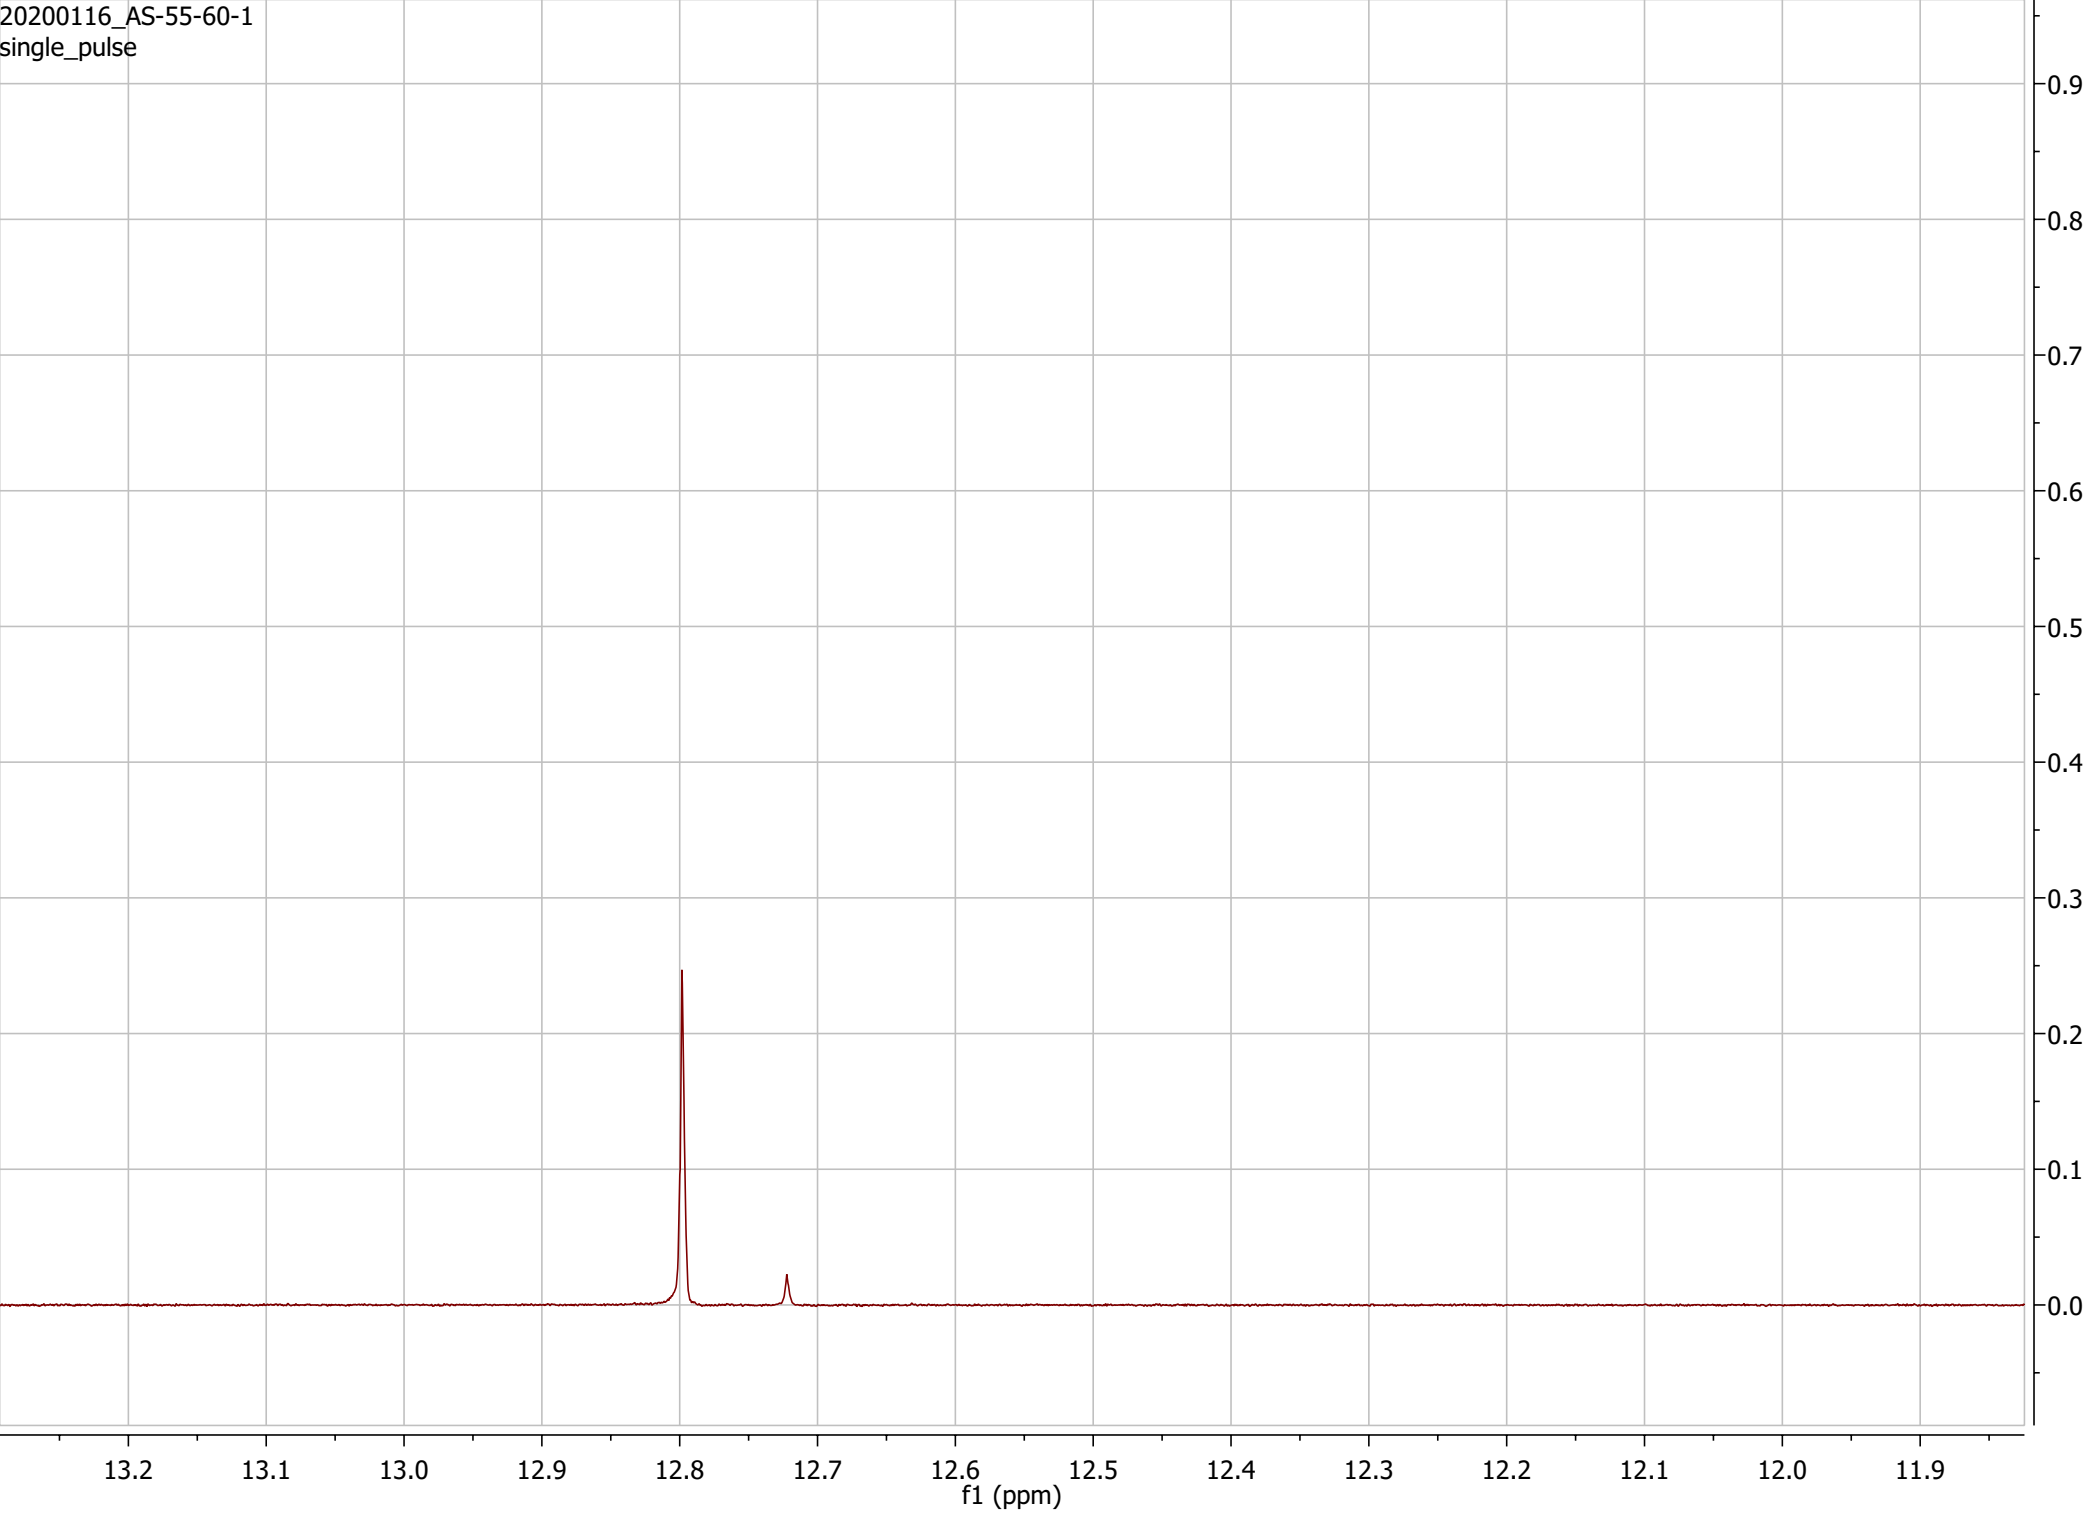

20191031\_AS-90-110  
single\_pulse

Compound-7-proton

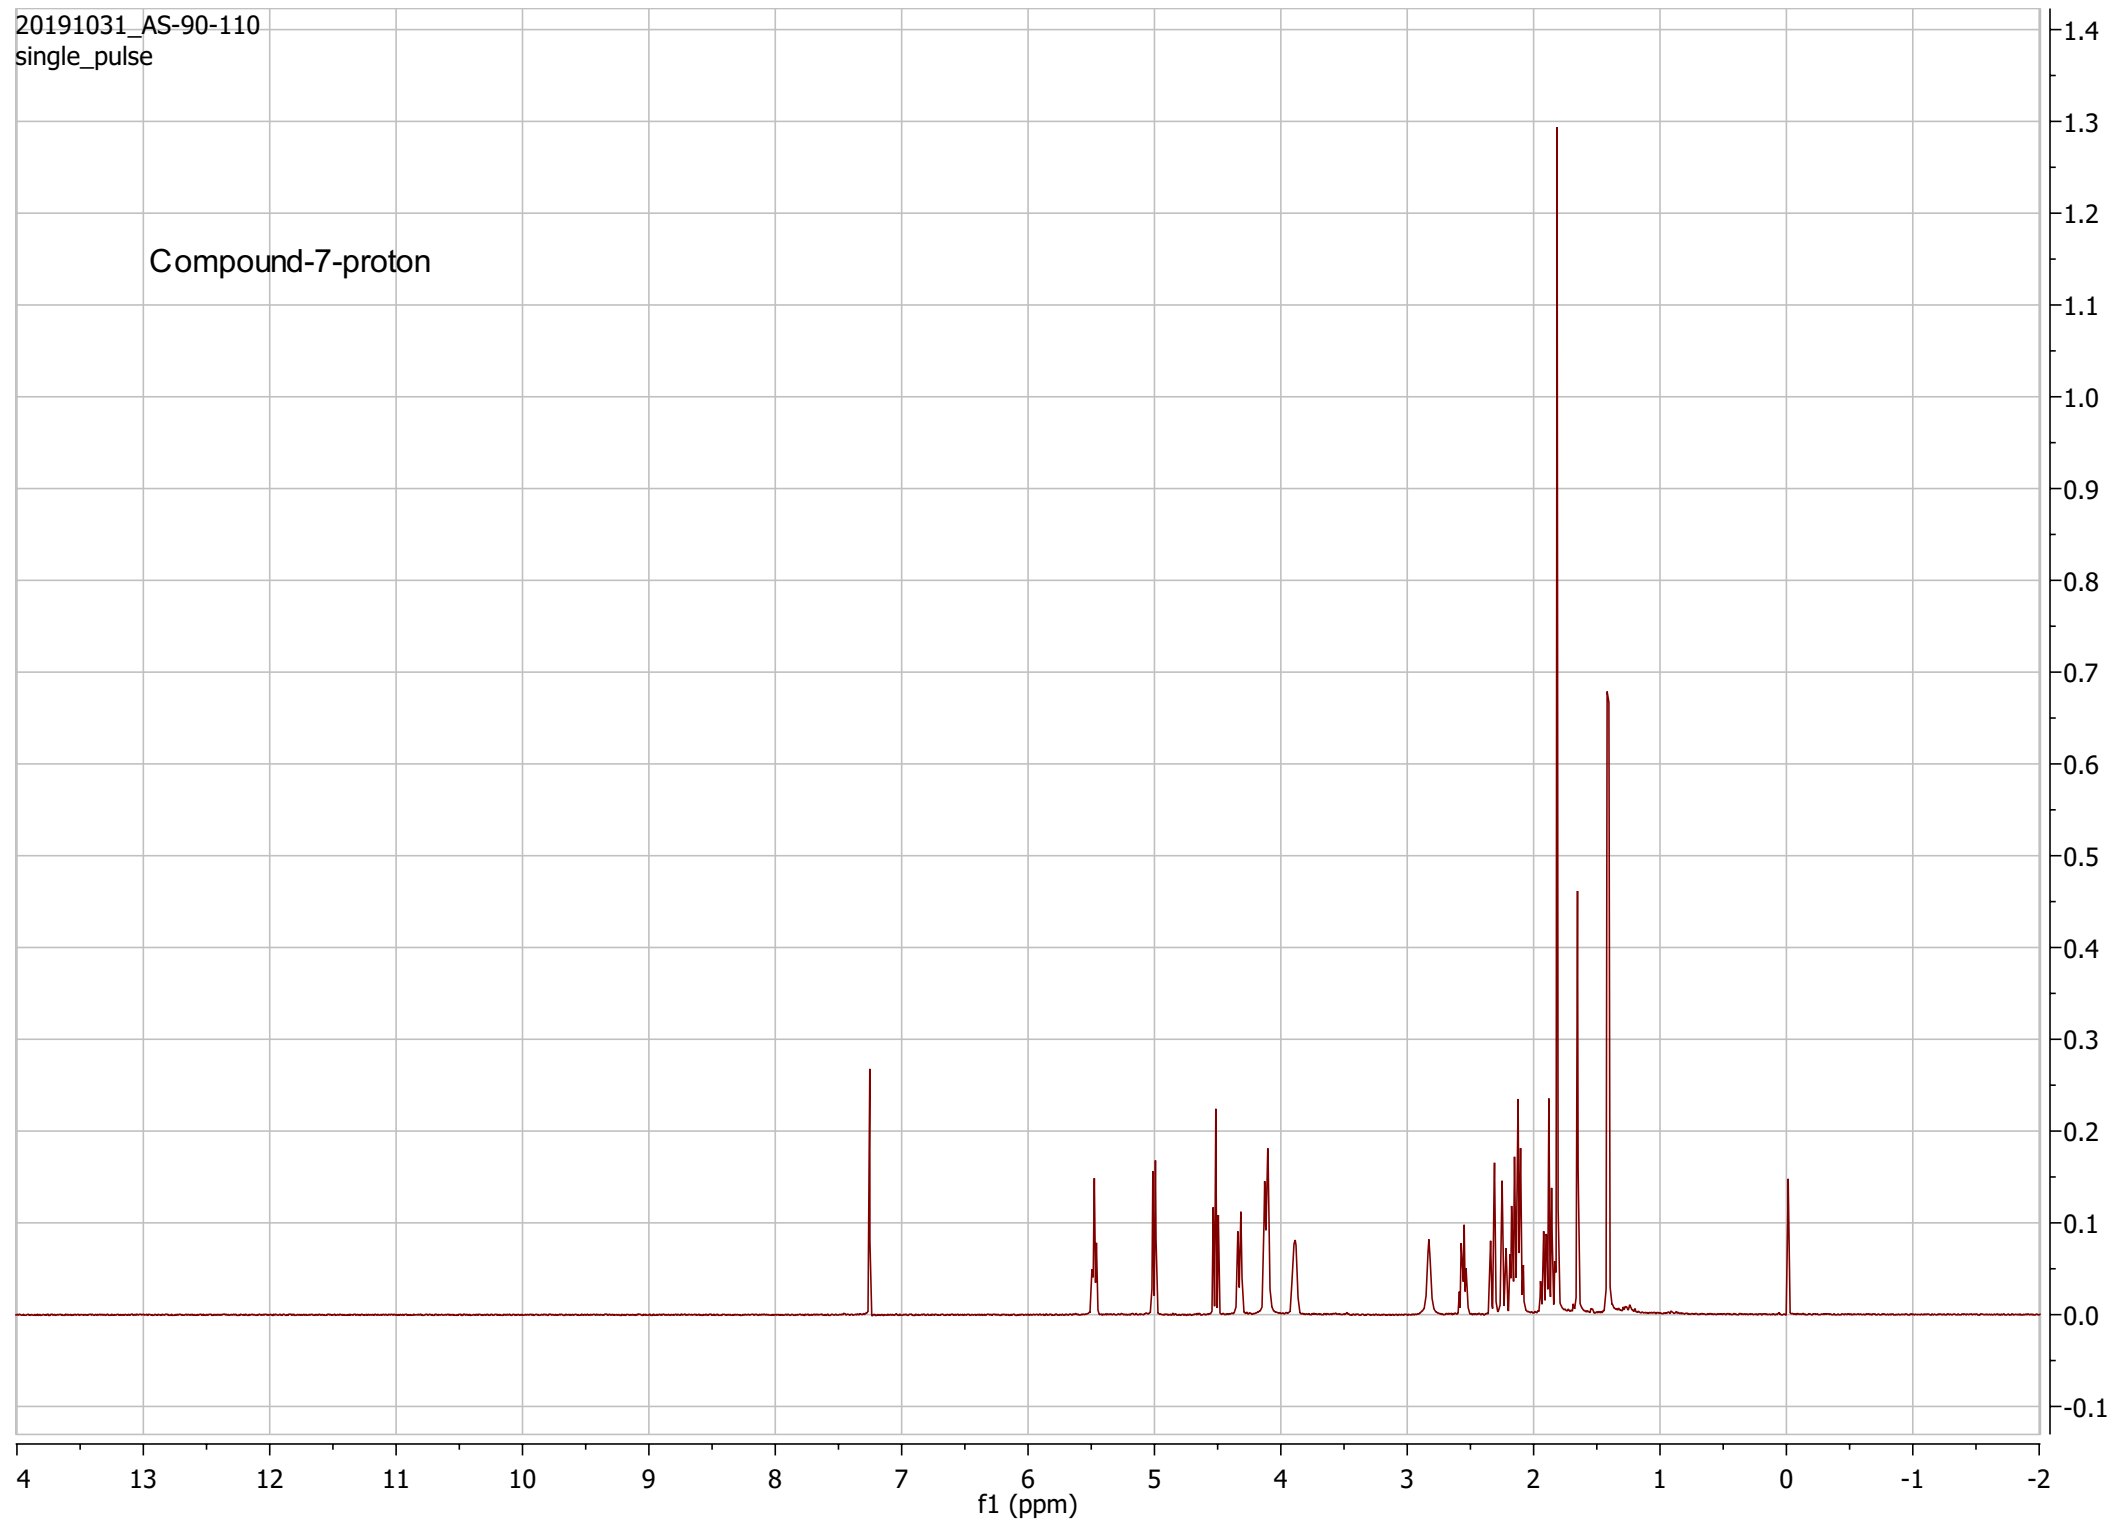

20191031\_AS-90-110  
single\_pulse

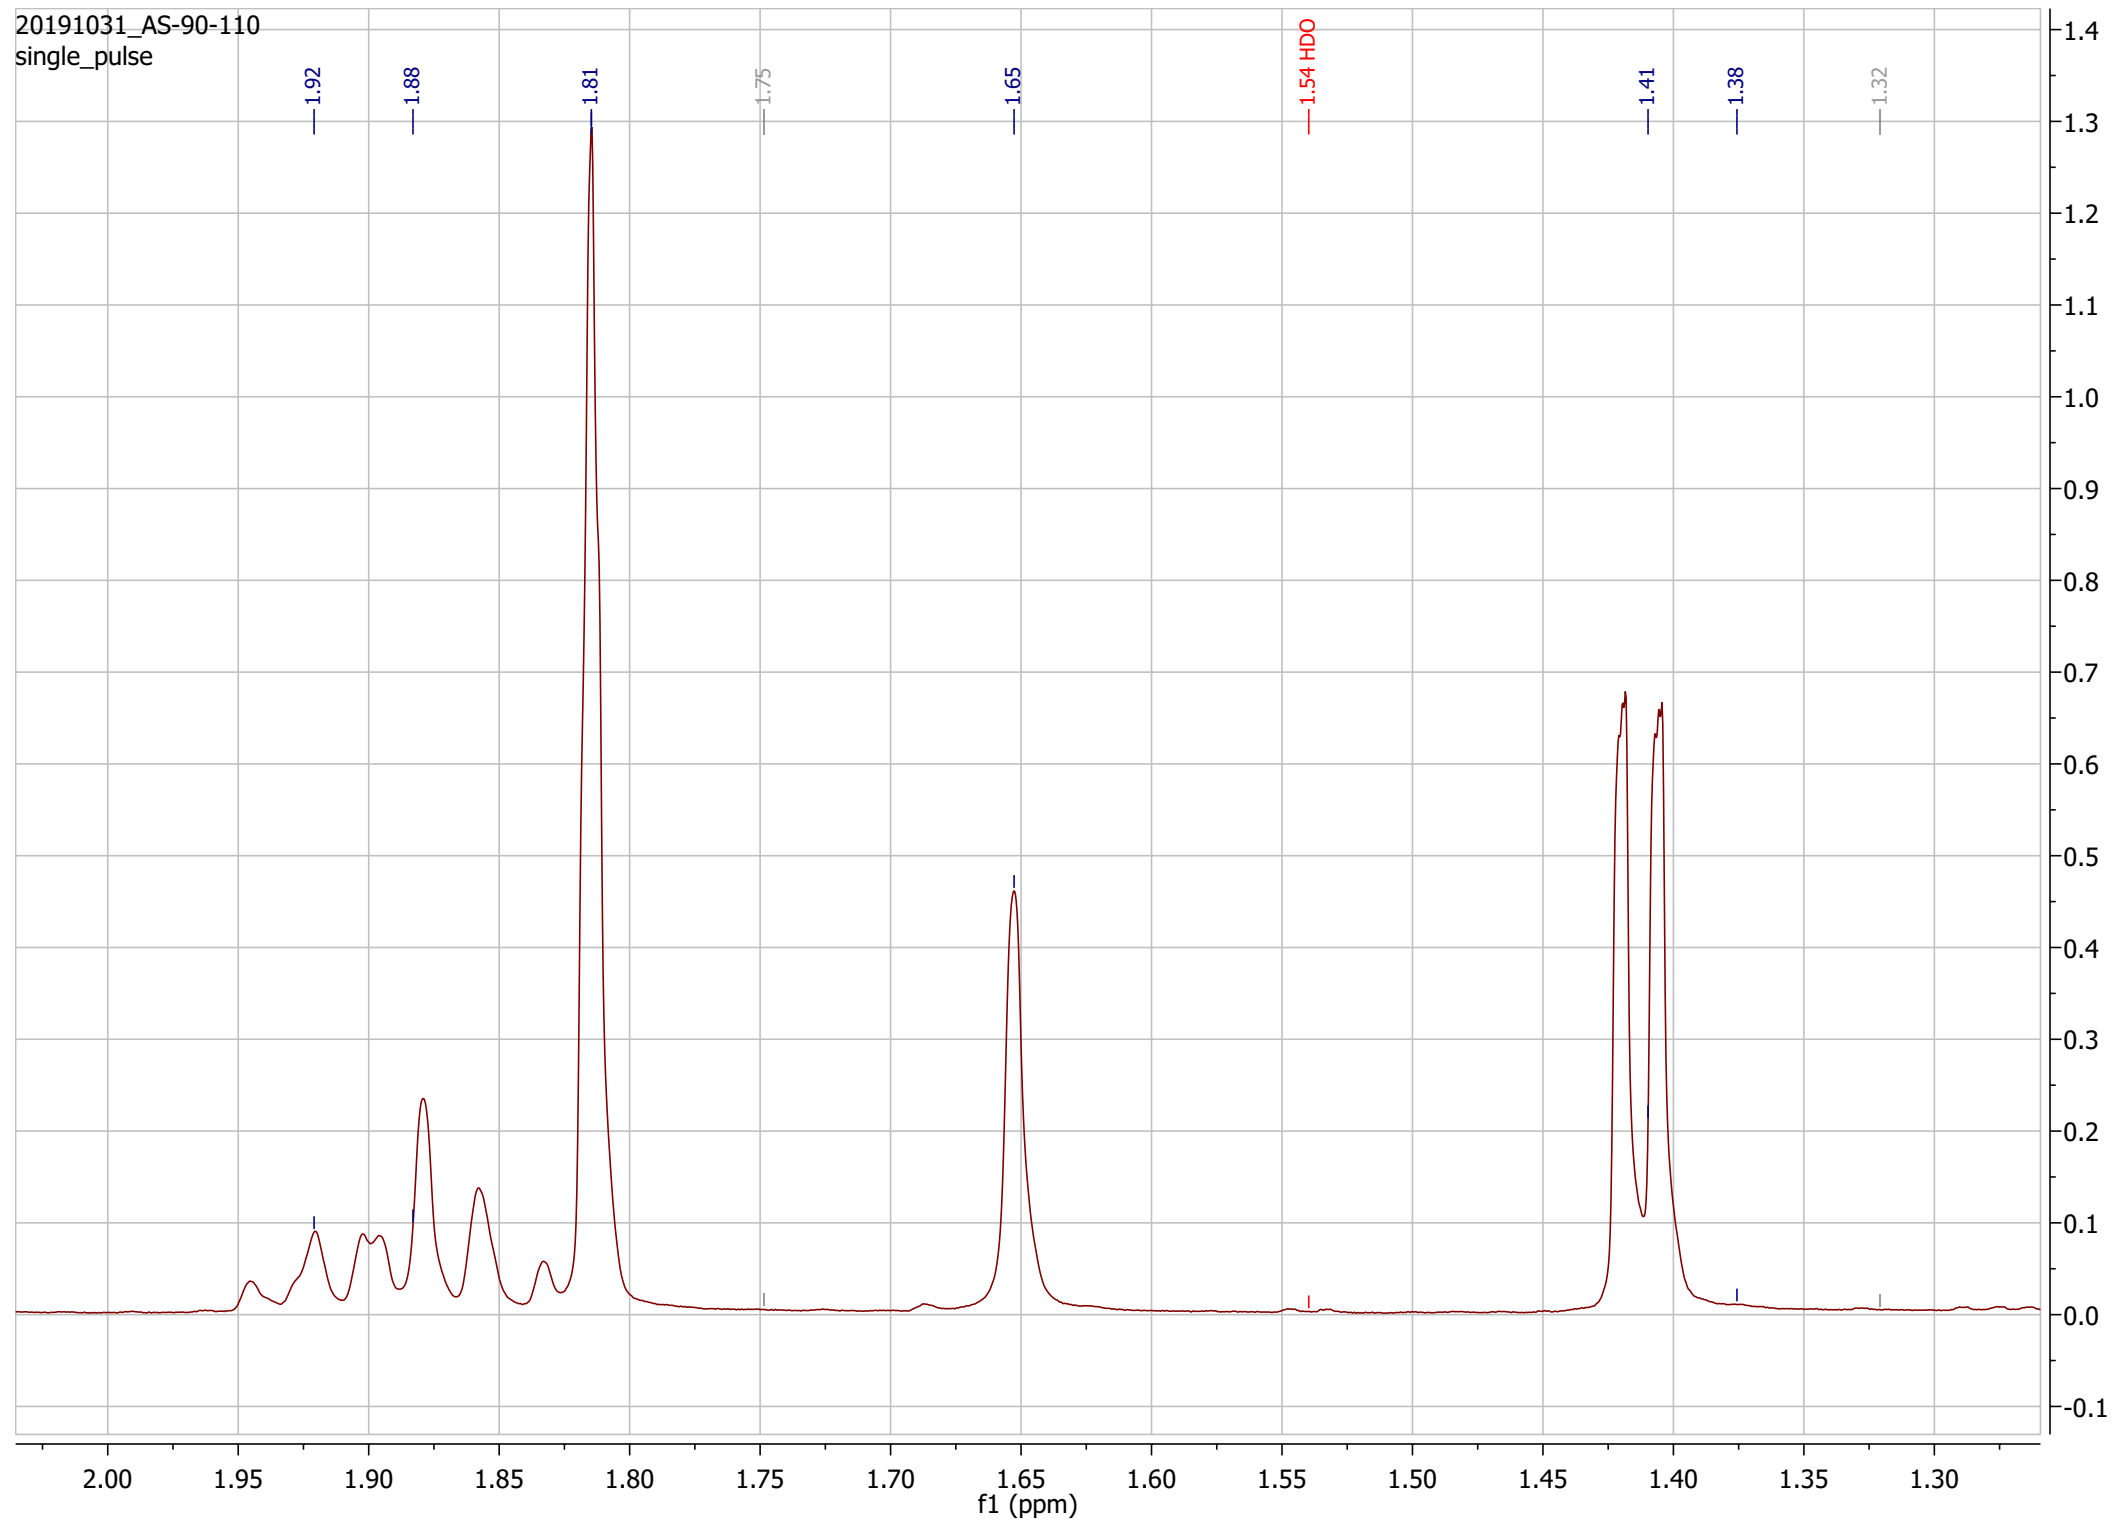

20191031\_AS-90-110  
single\_pulse

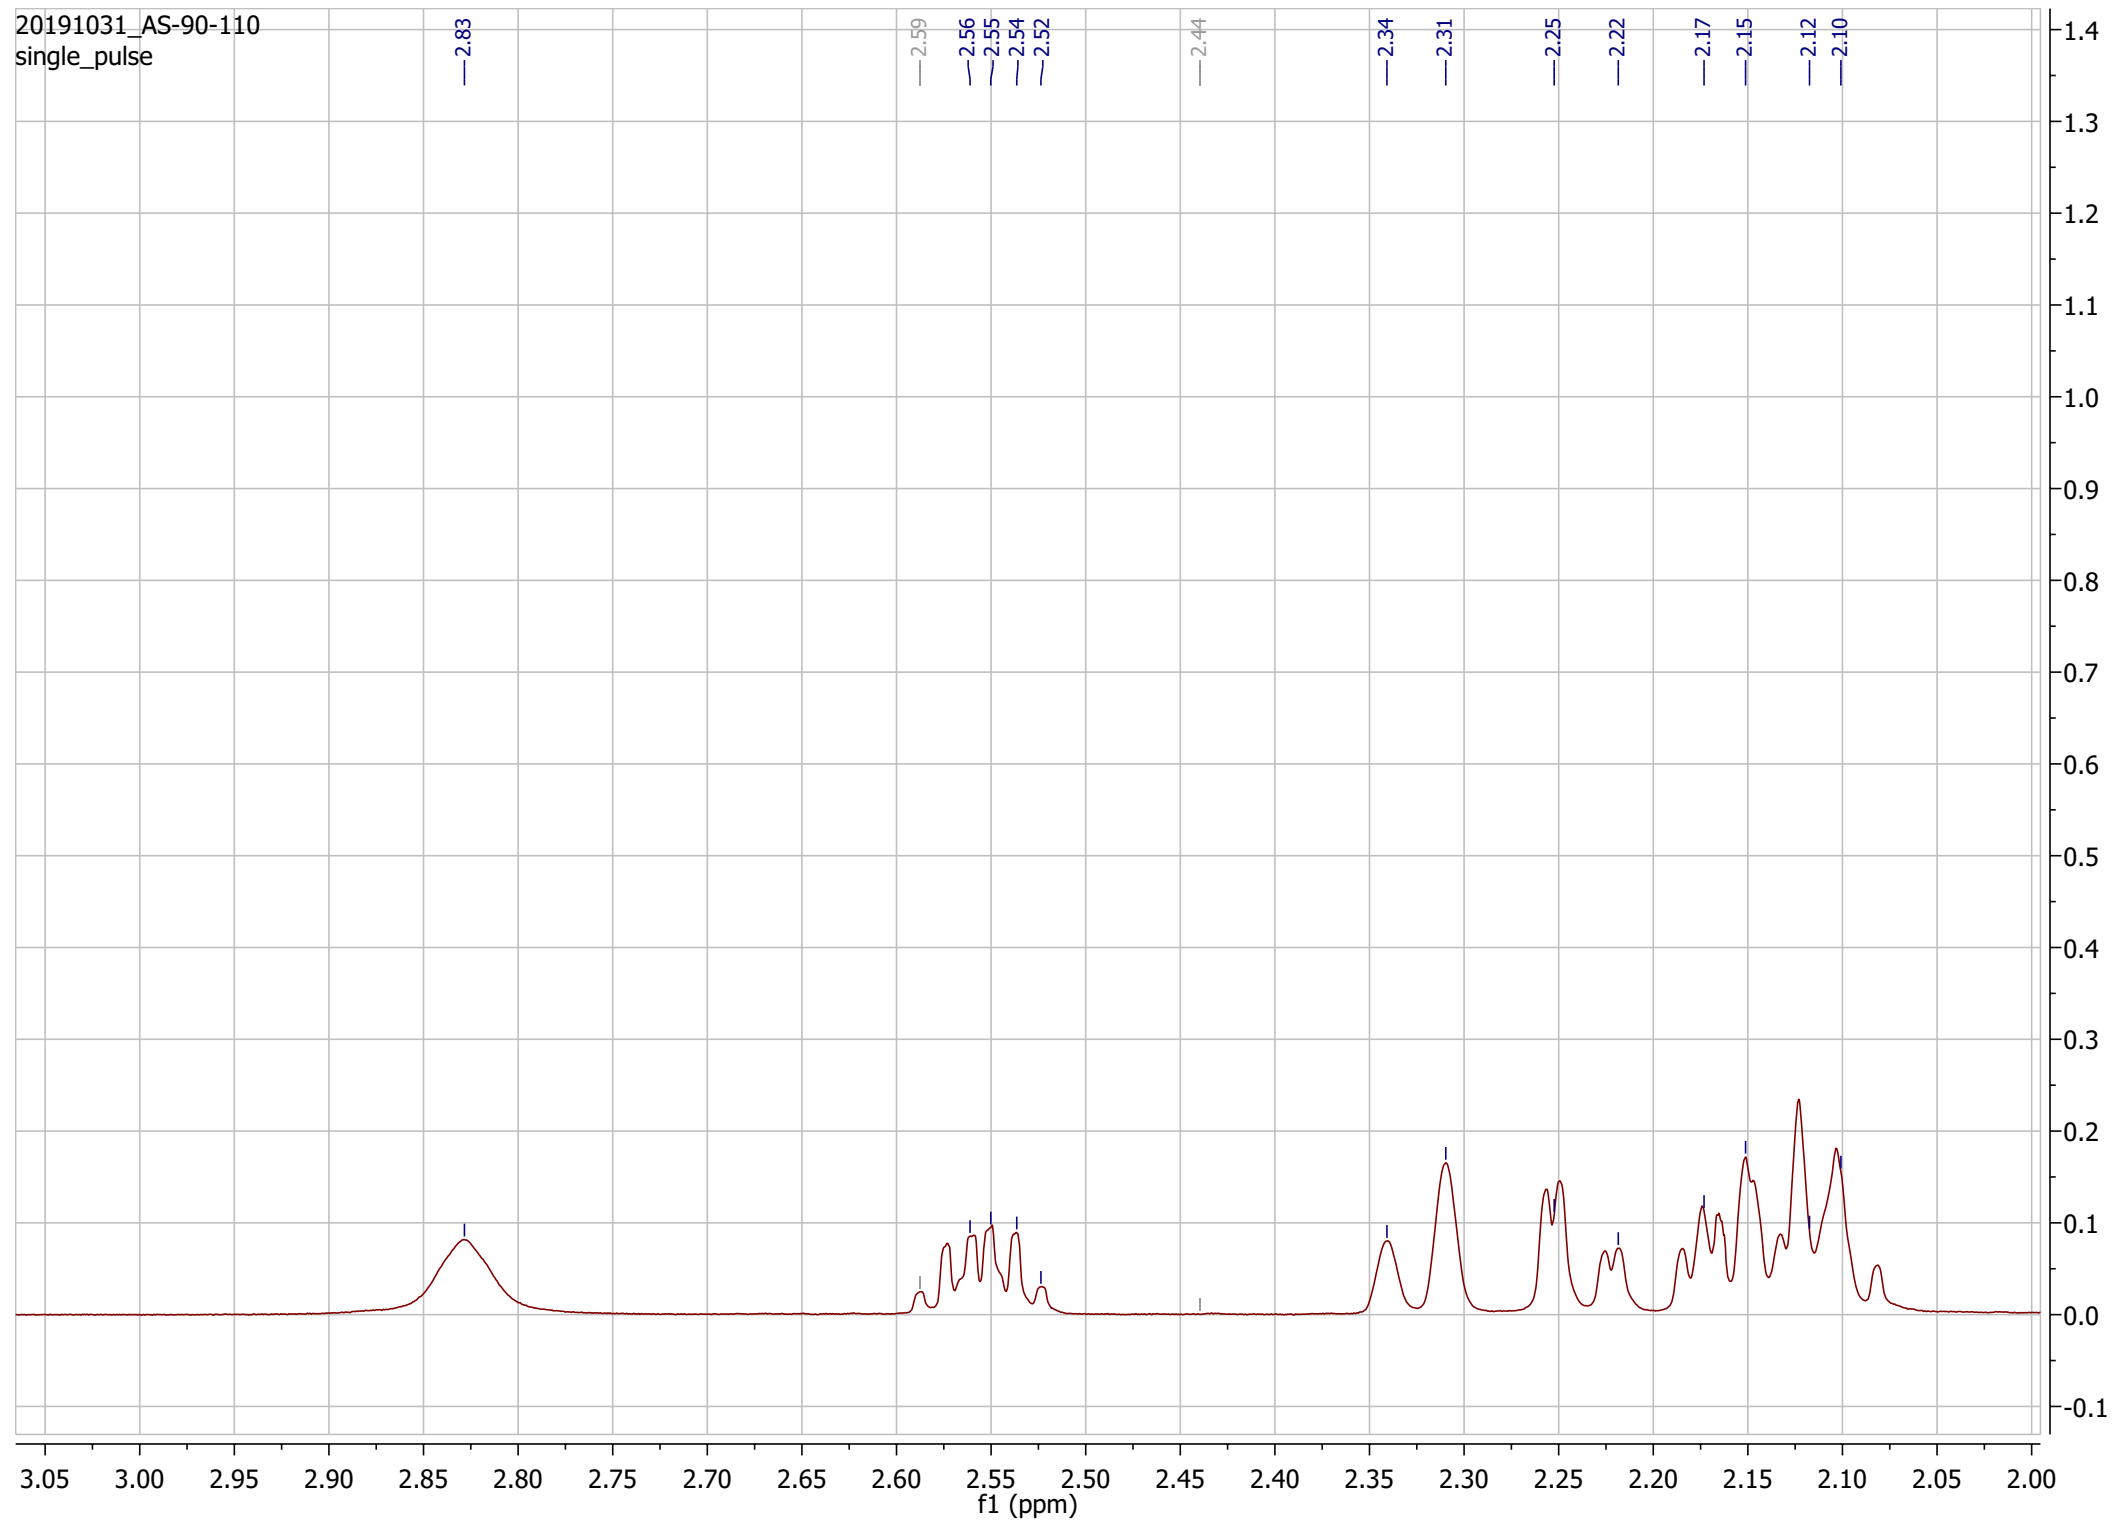

20191031\_AS-90-110  
single\_pulse

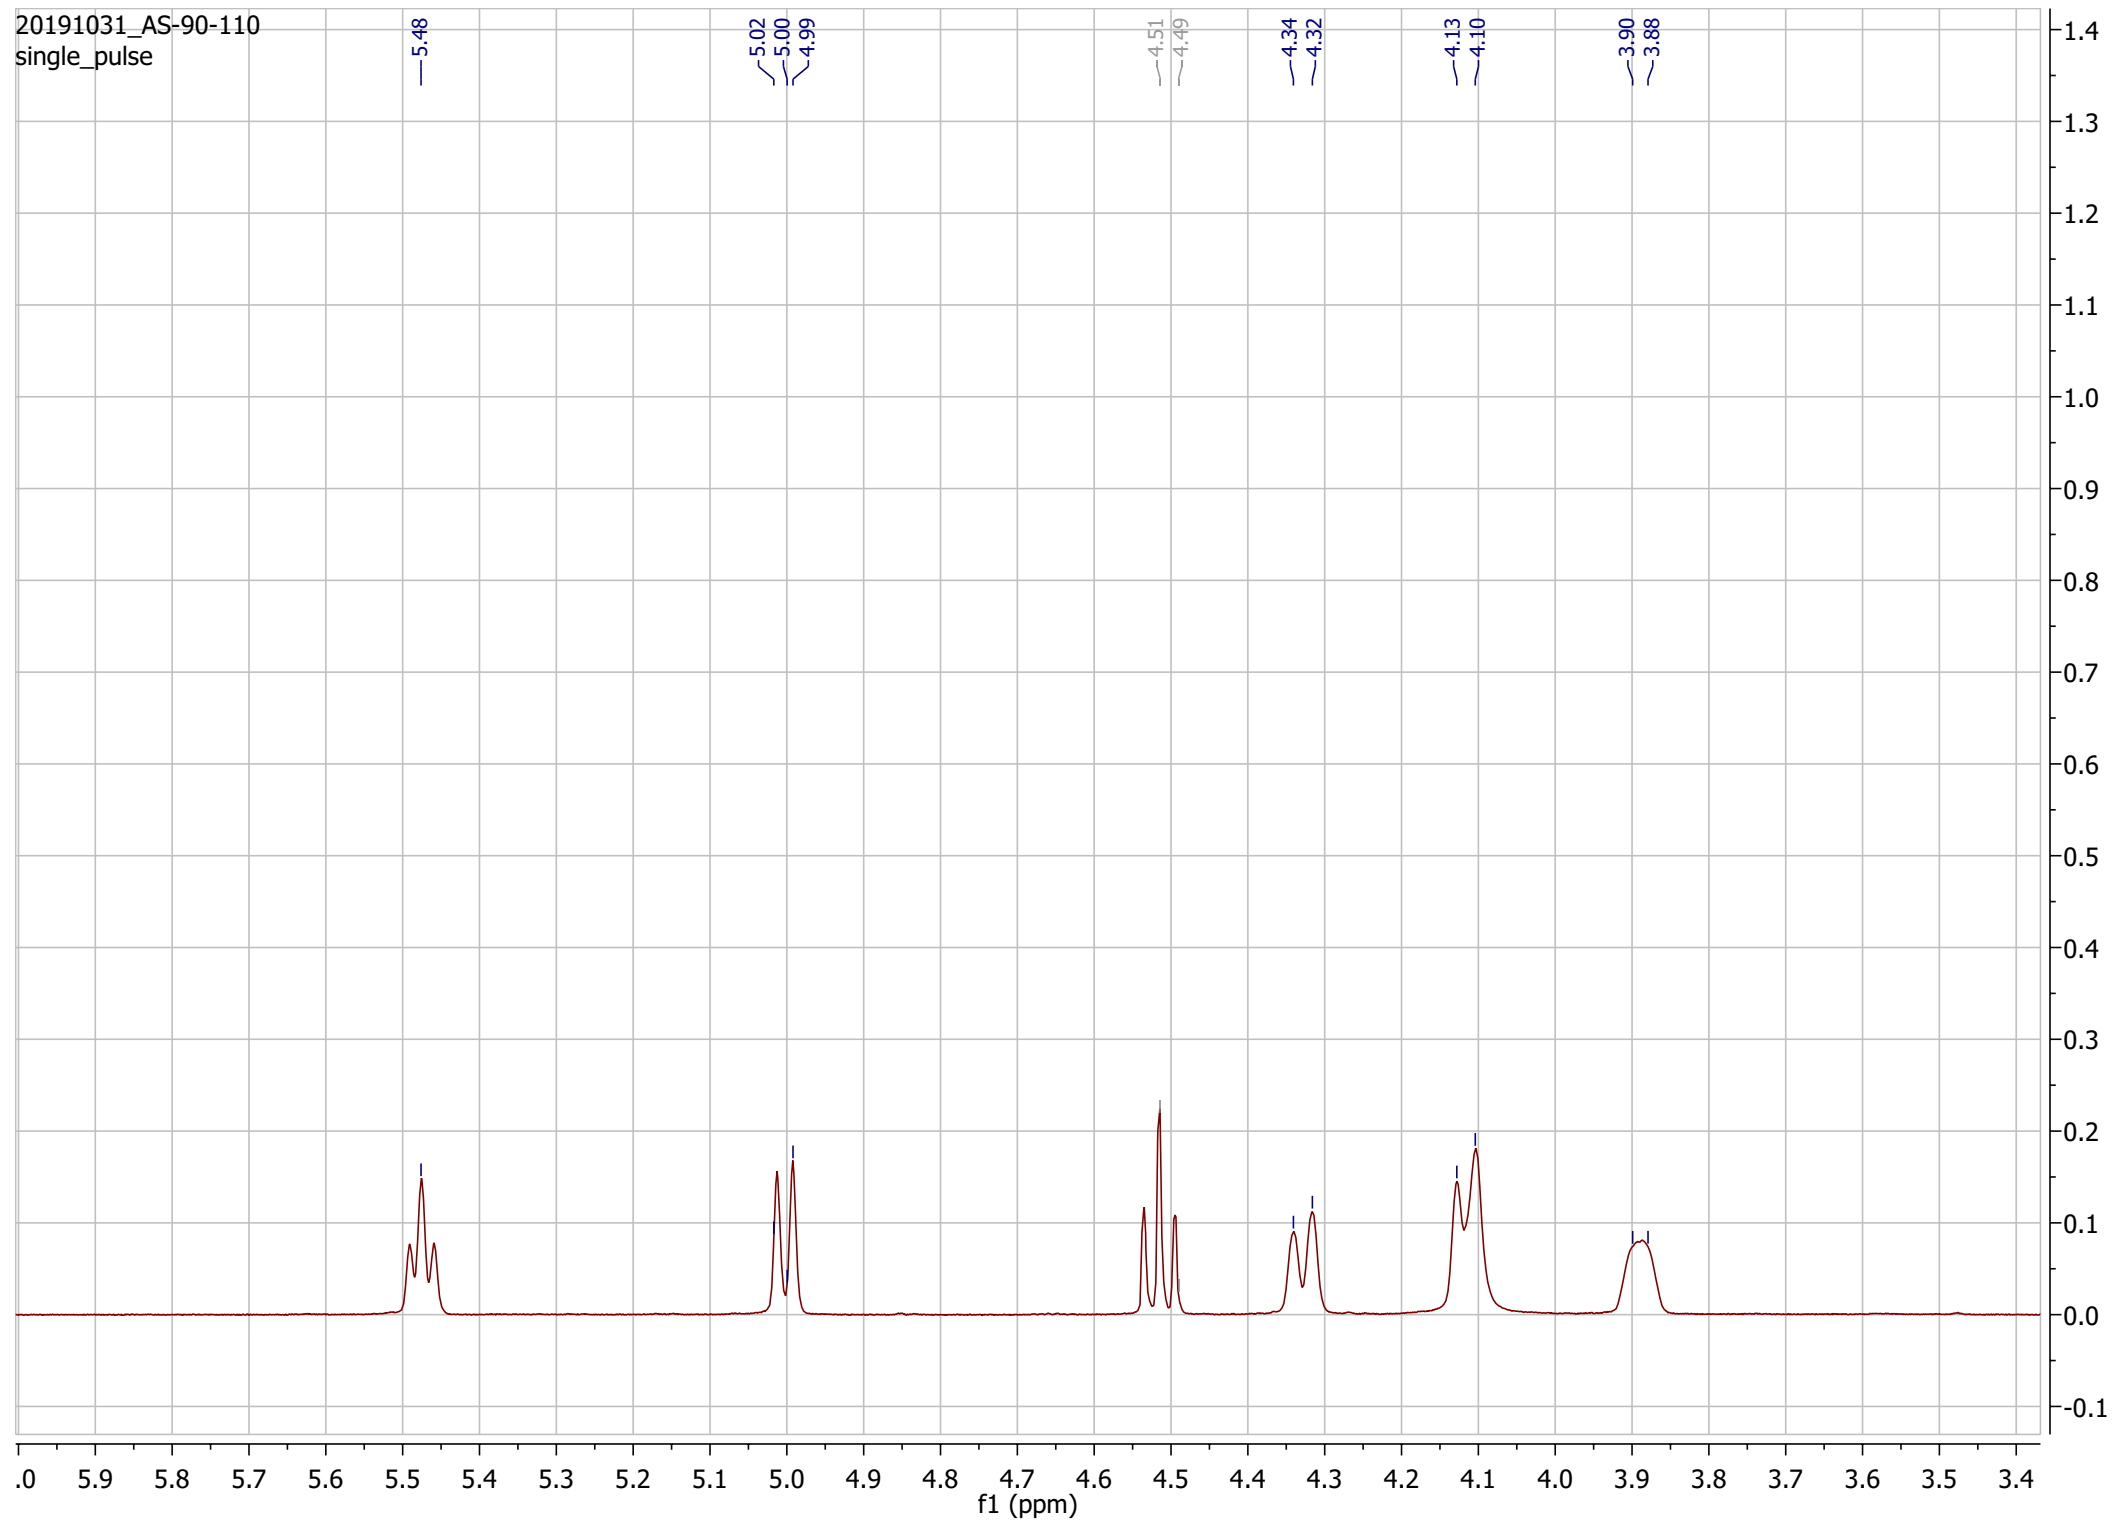

20191105-AS-95-110  
single pulse decoupled gated NOE

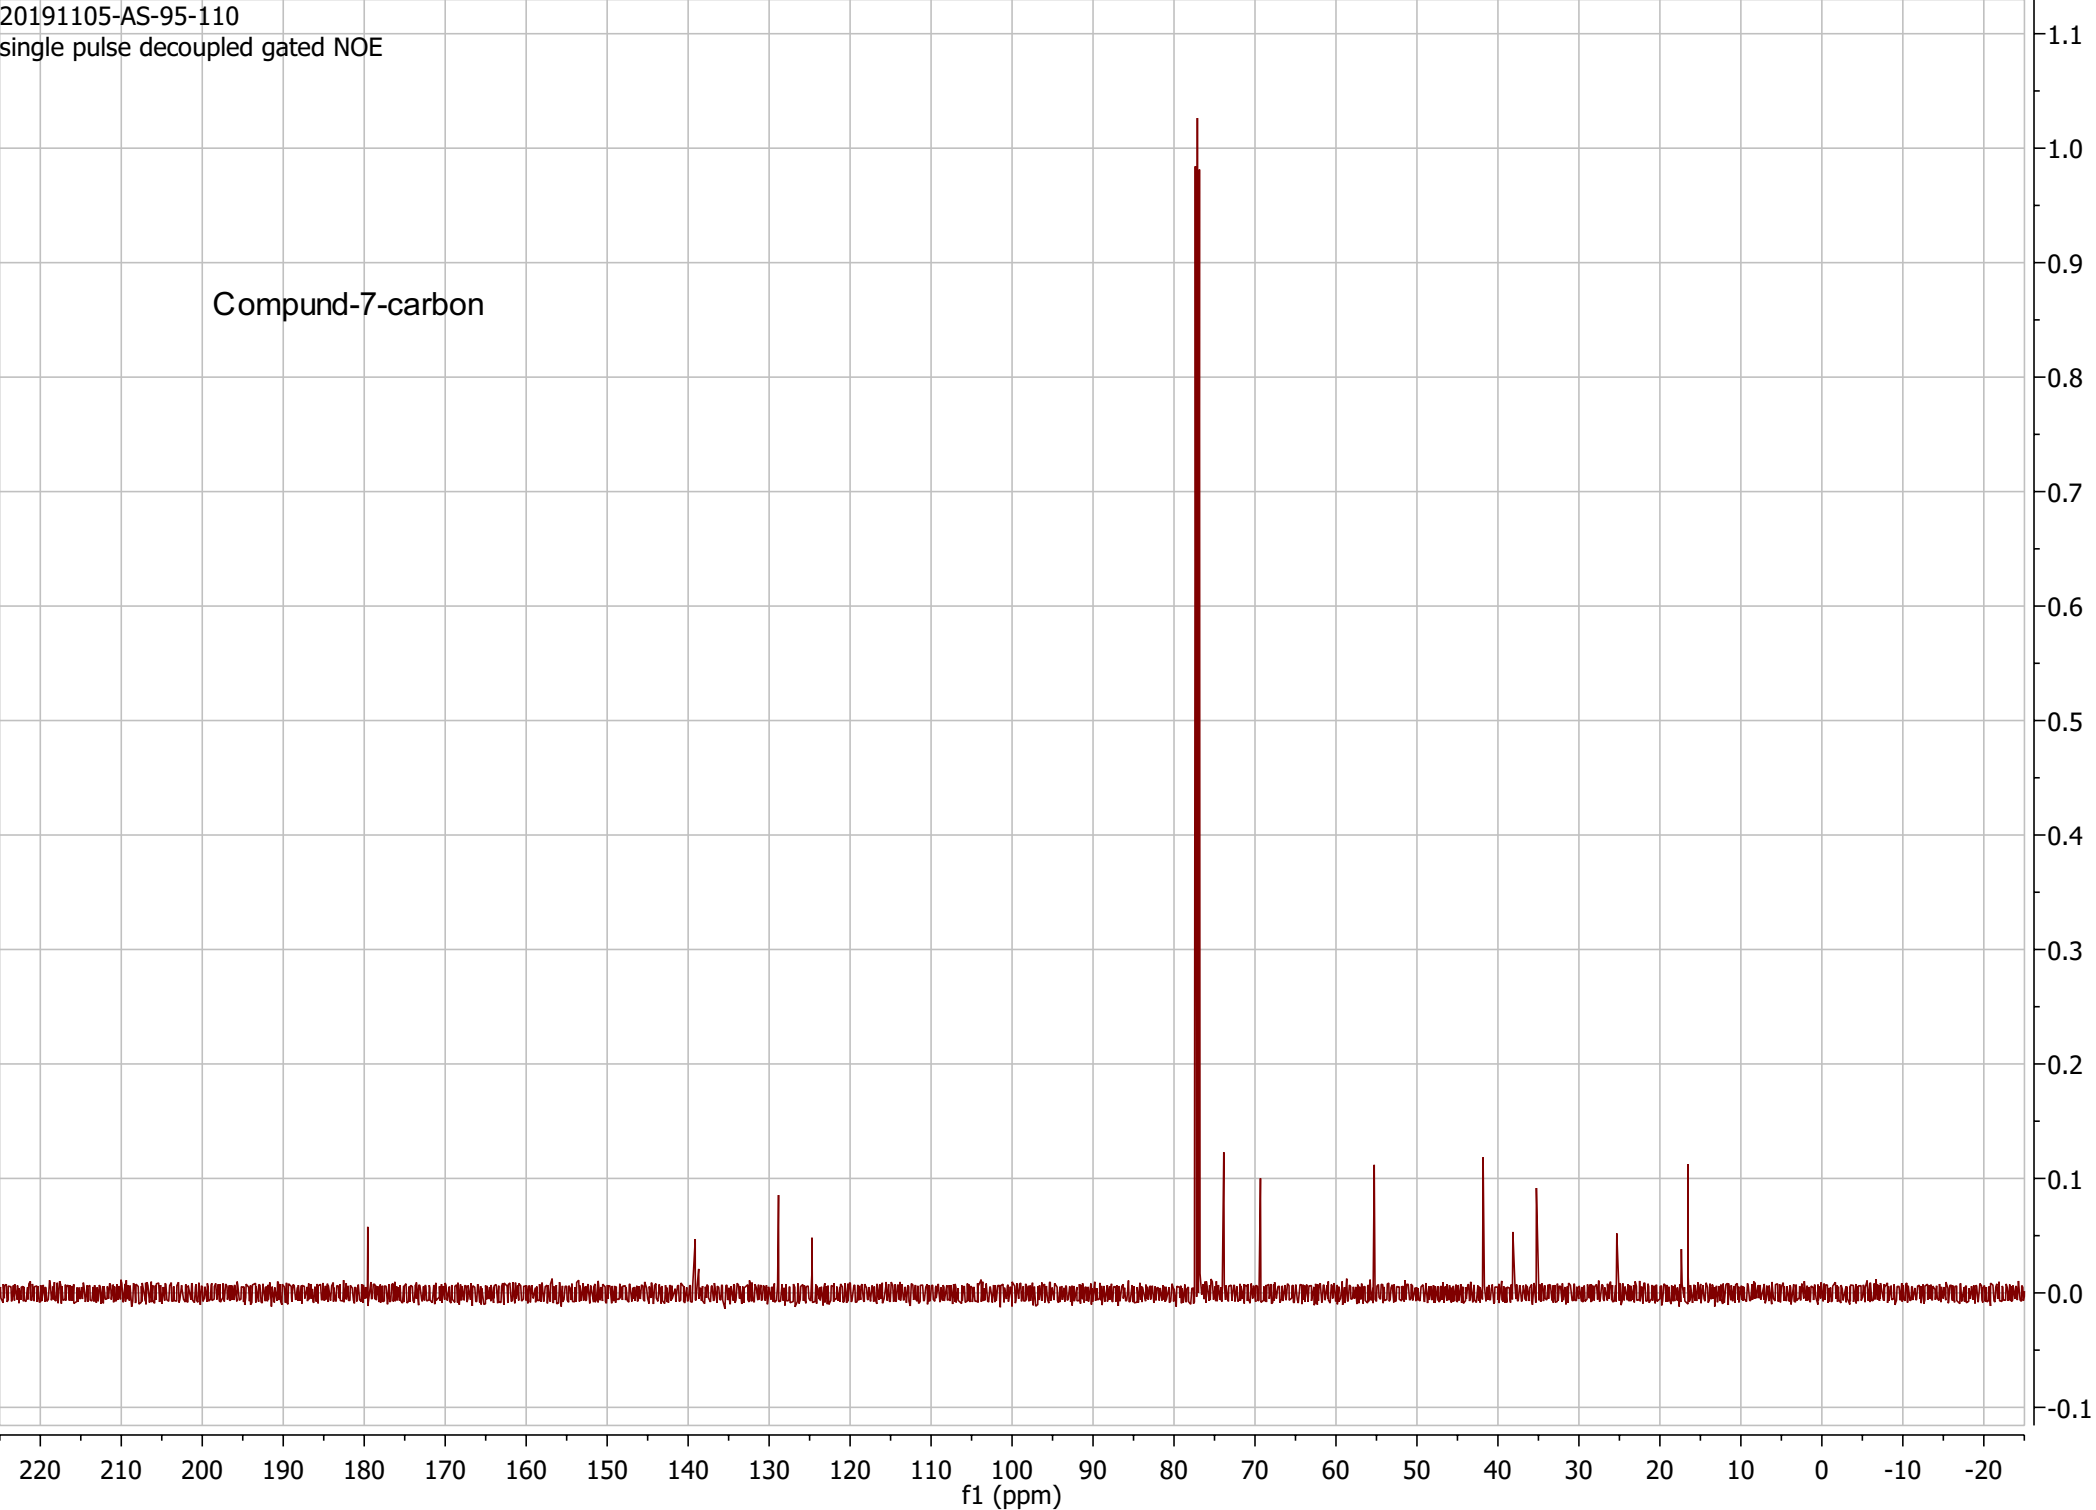



20191105-AS-95110

single pulse decoupled gated NOE

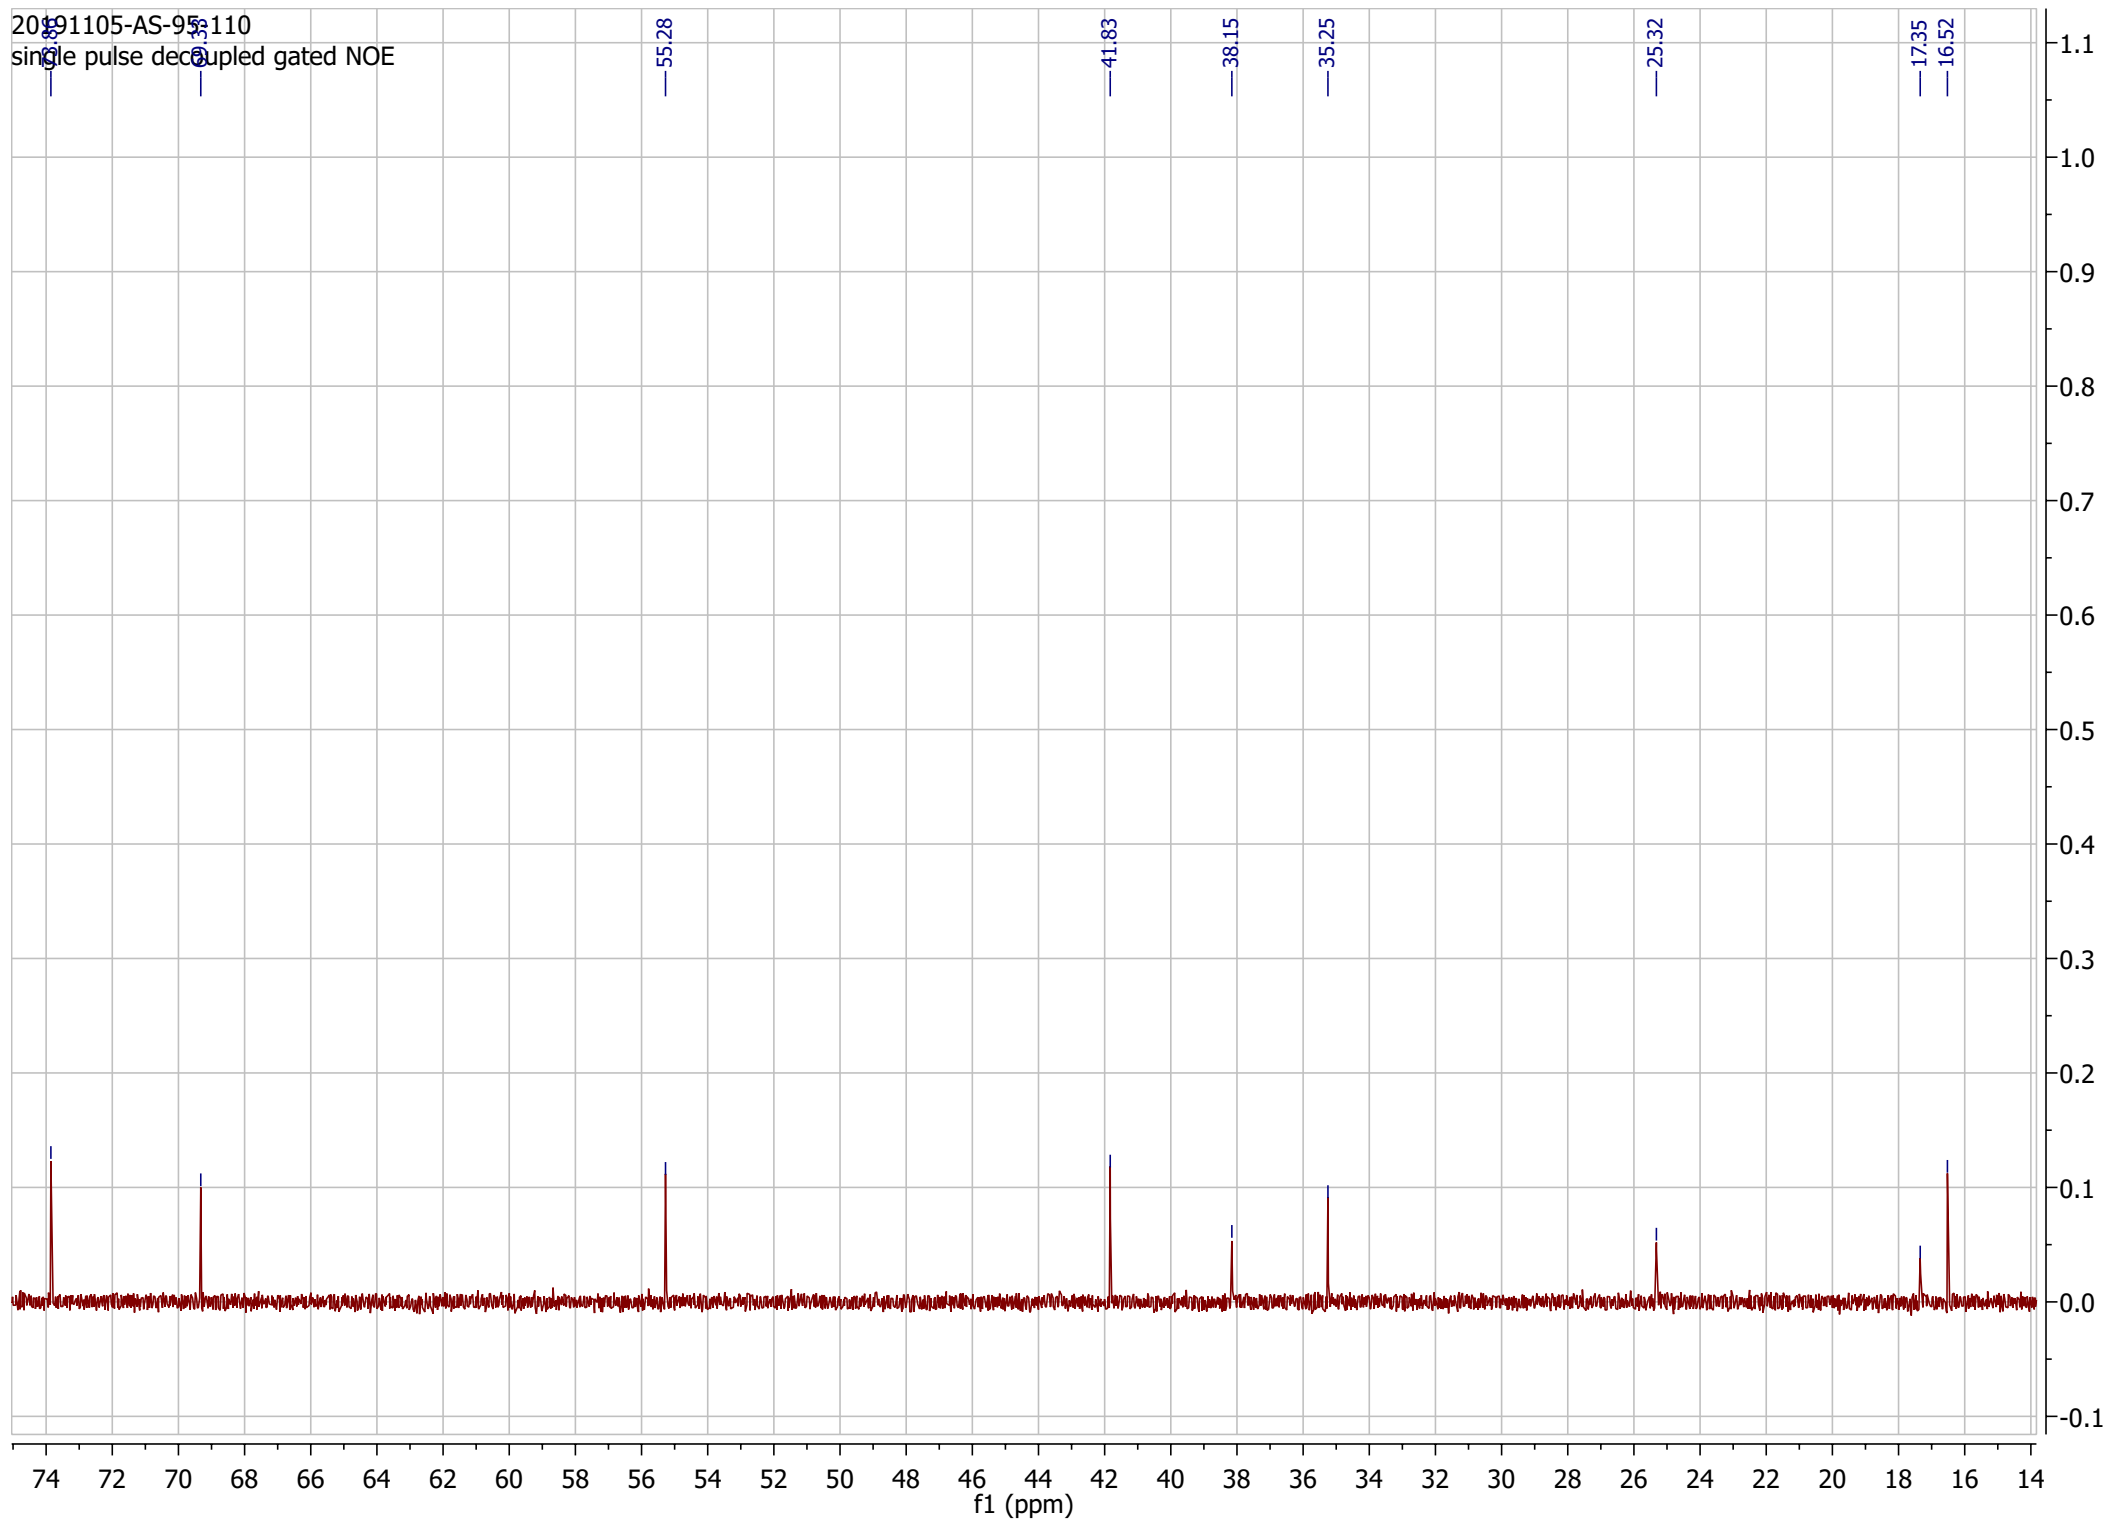

20191105-AS-95-110

single pulse decoupled gated NOE

Compound-7-carbon

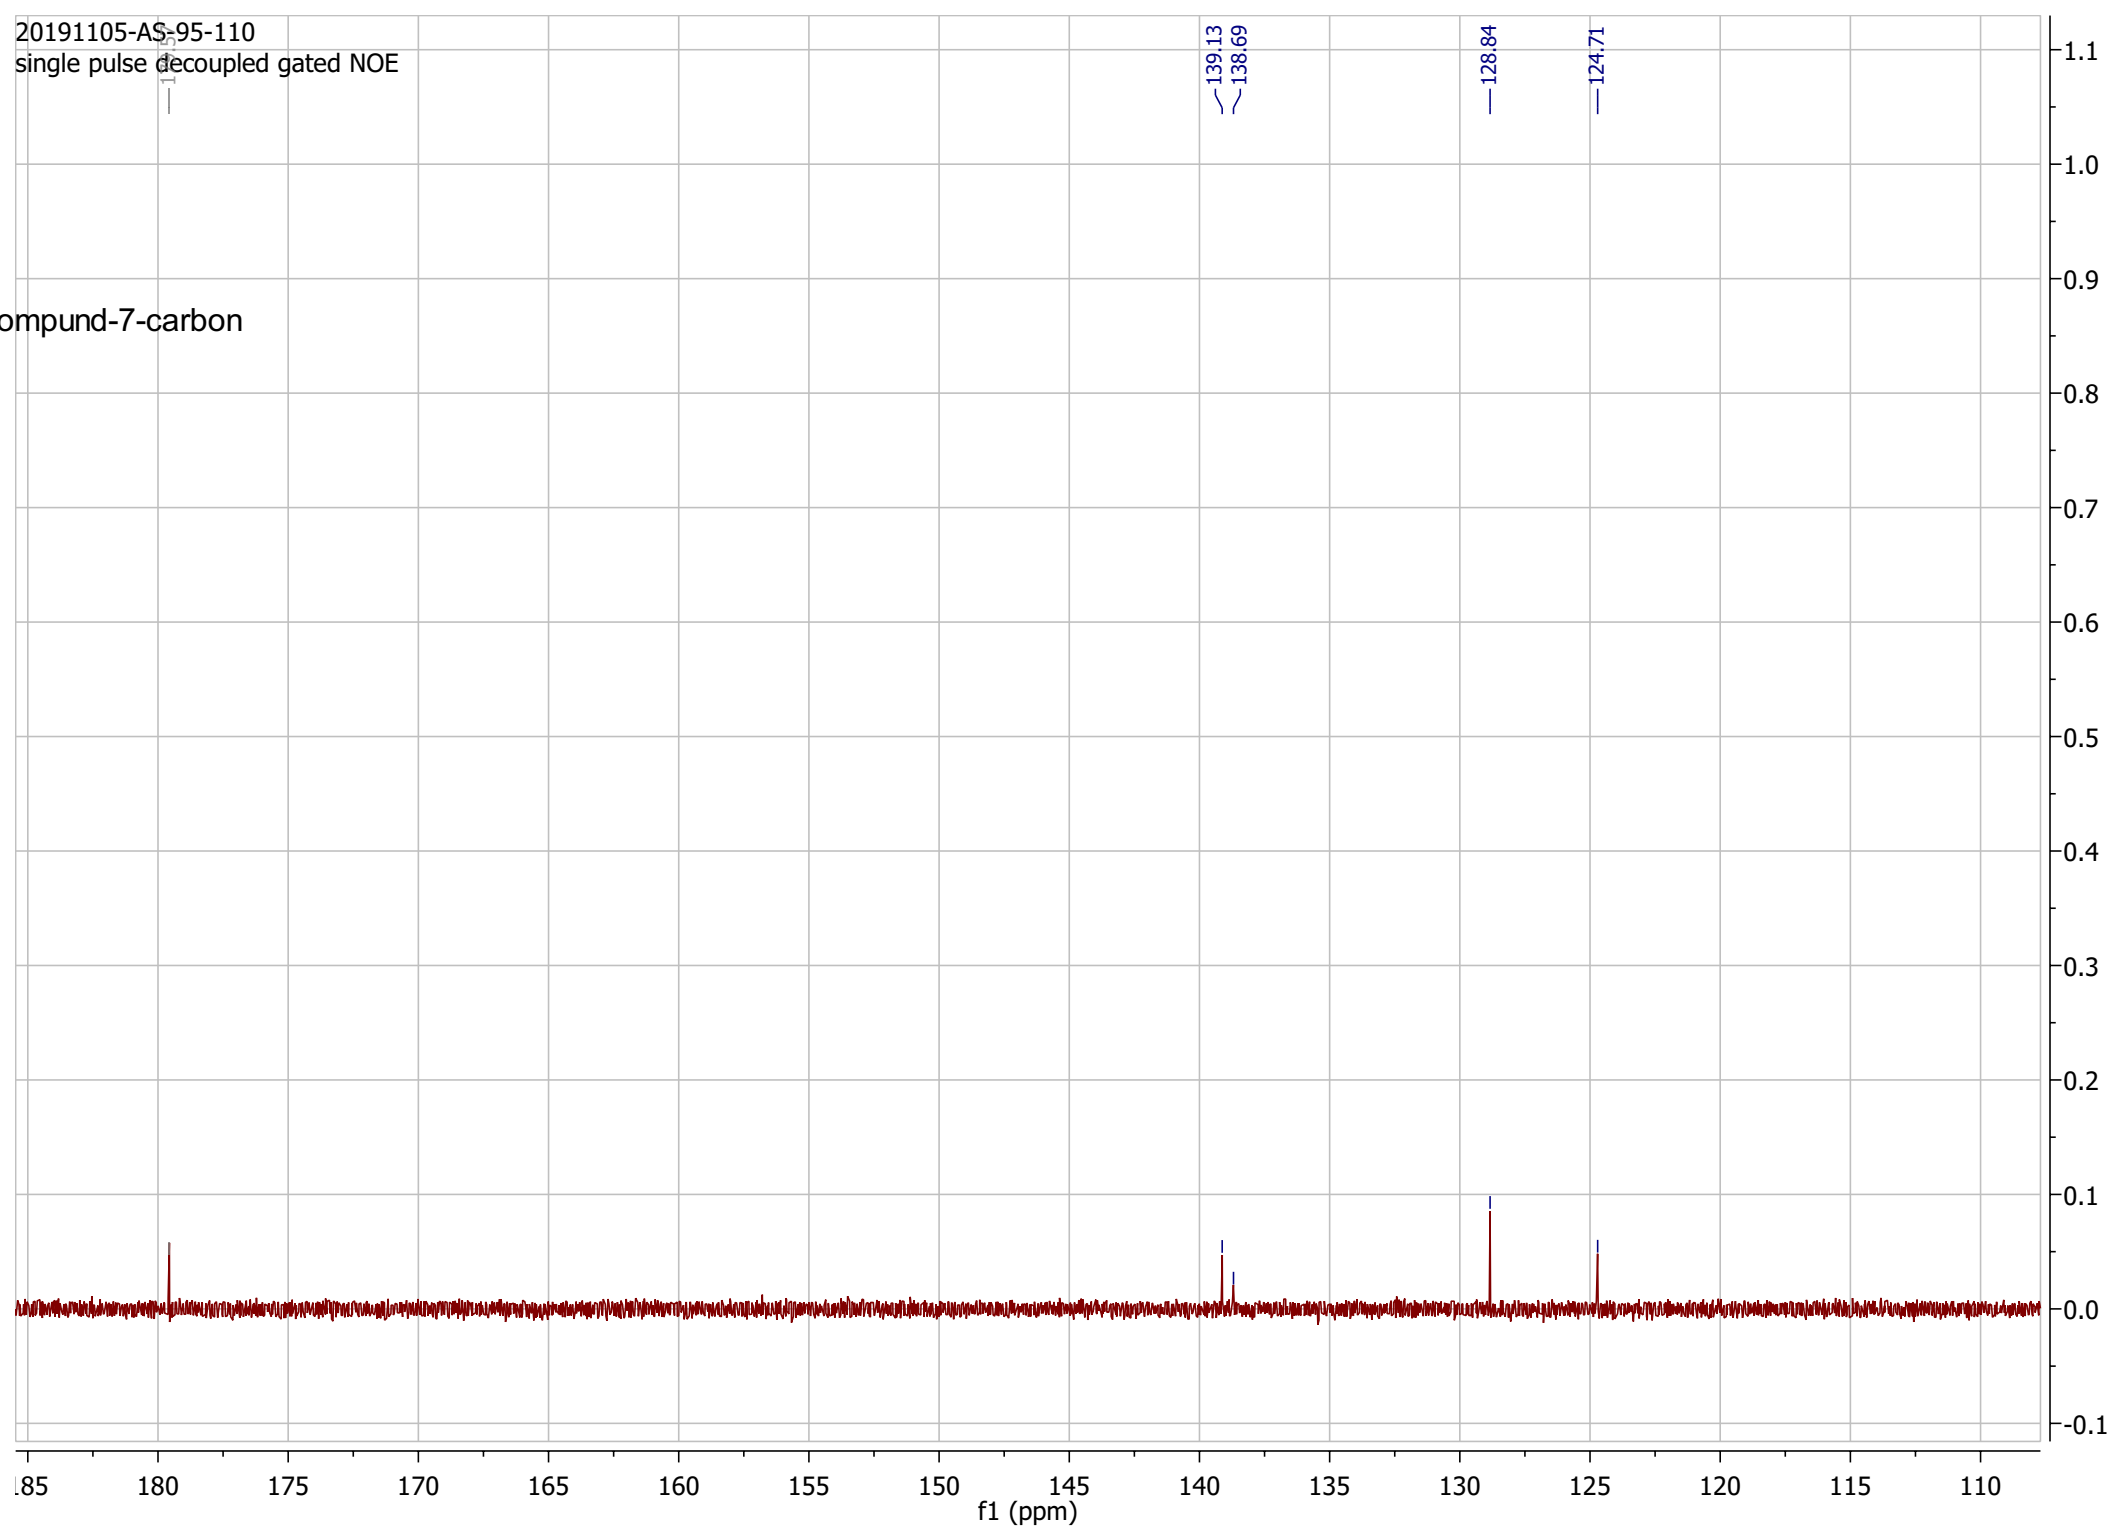

20191108-AS-95-110

gradient enhanced HMQC with X-decoupling

Compound-7-HMQC

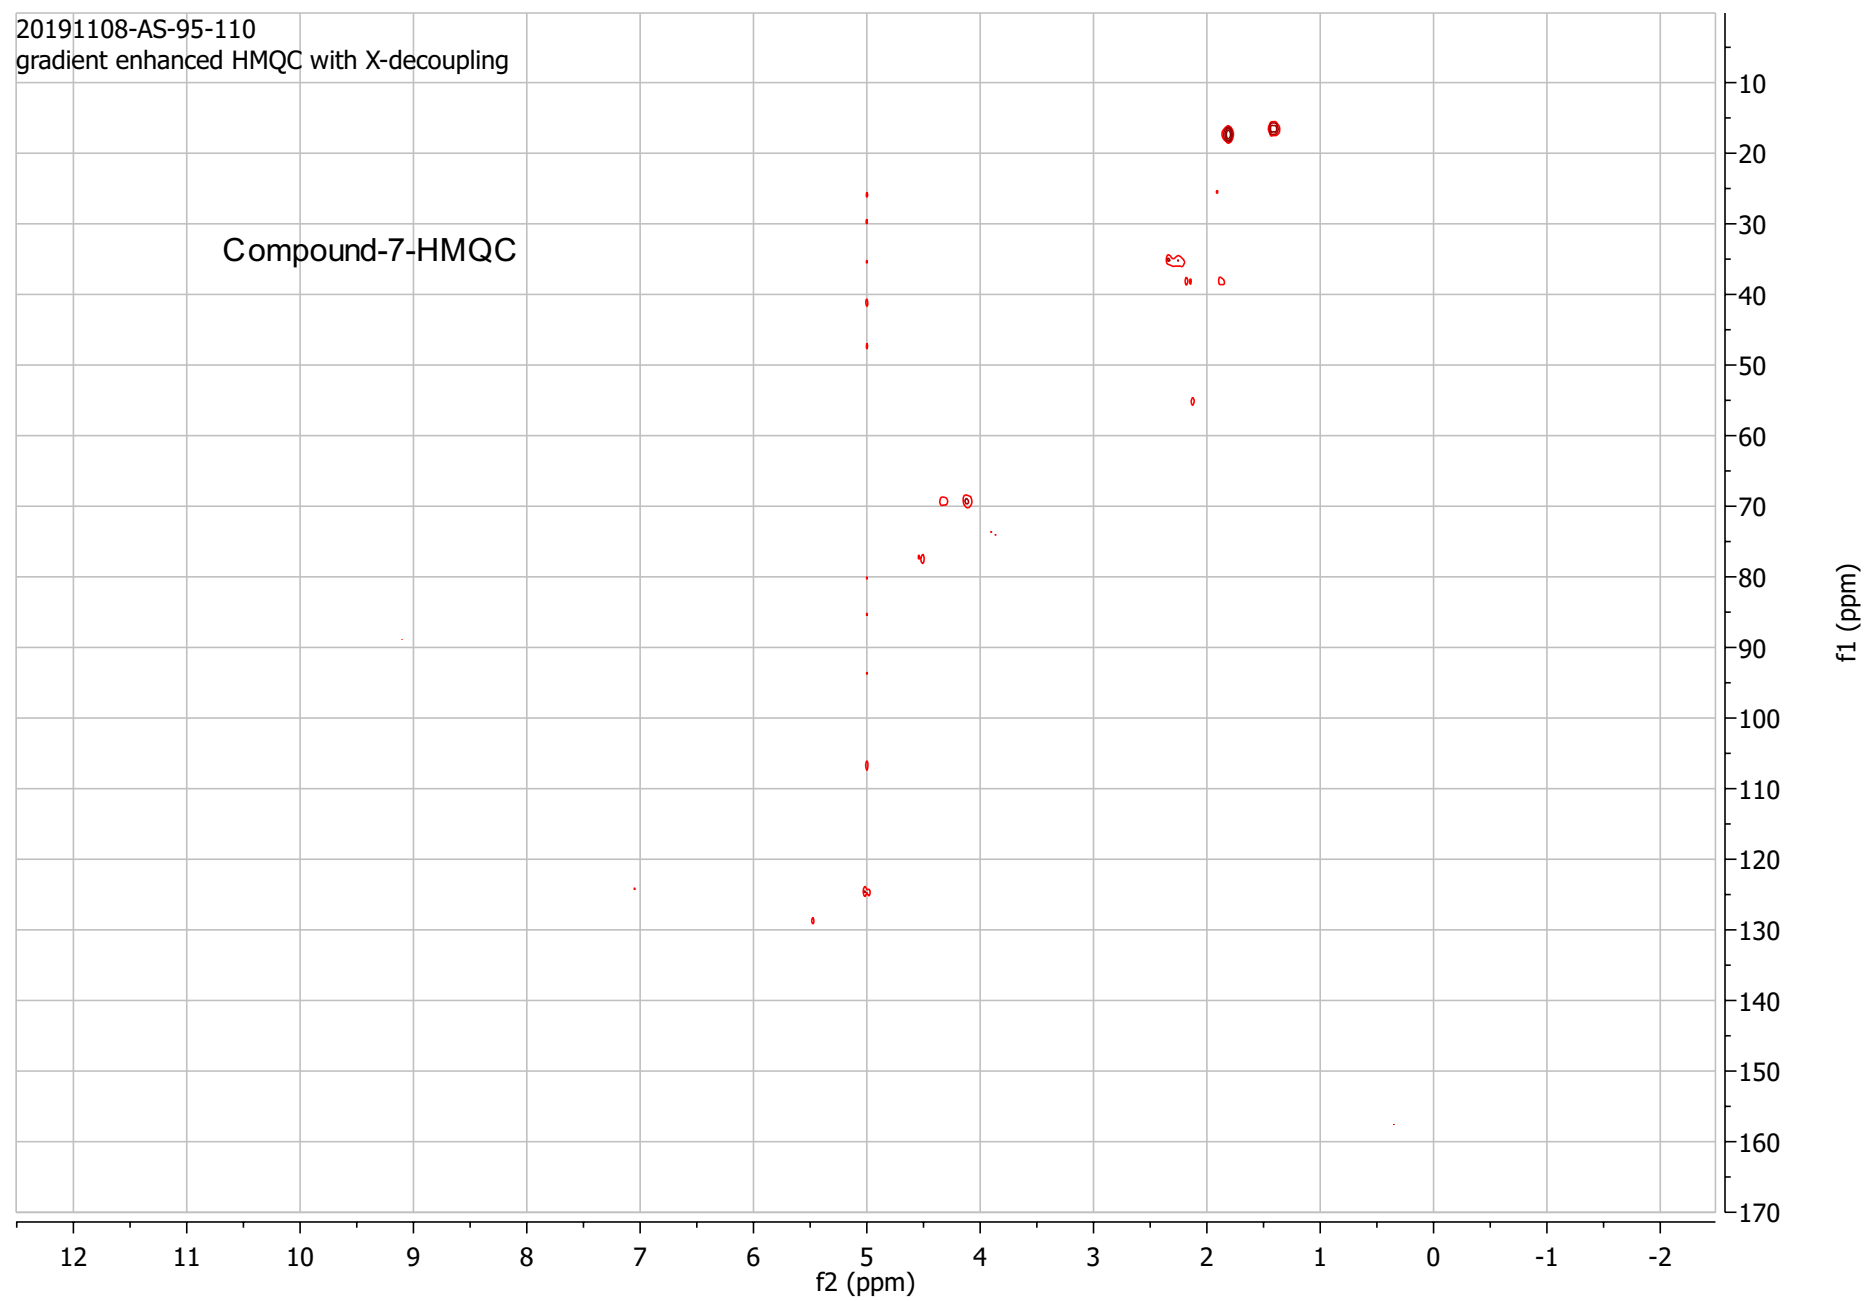

20191108-AS-95-110

gradient enhanced HMQC with X-decoupling

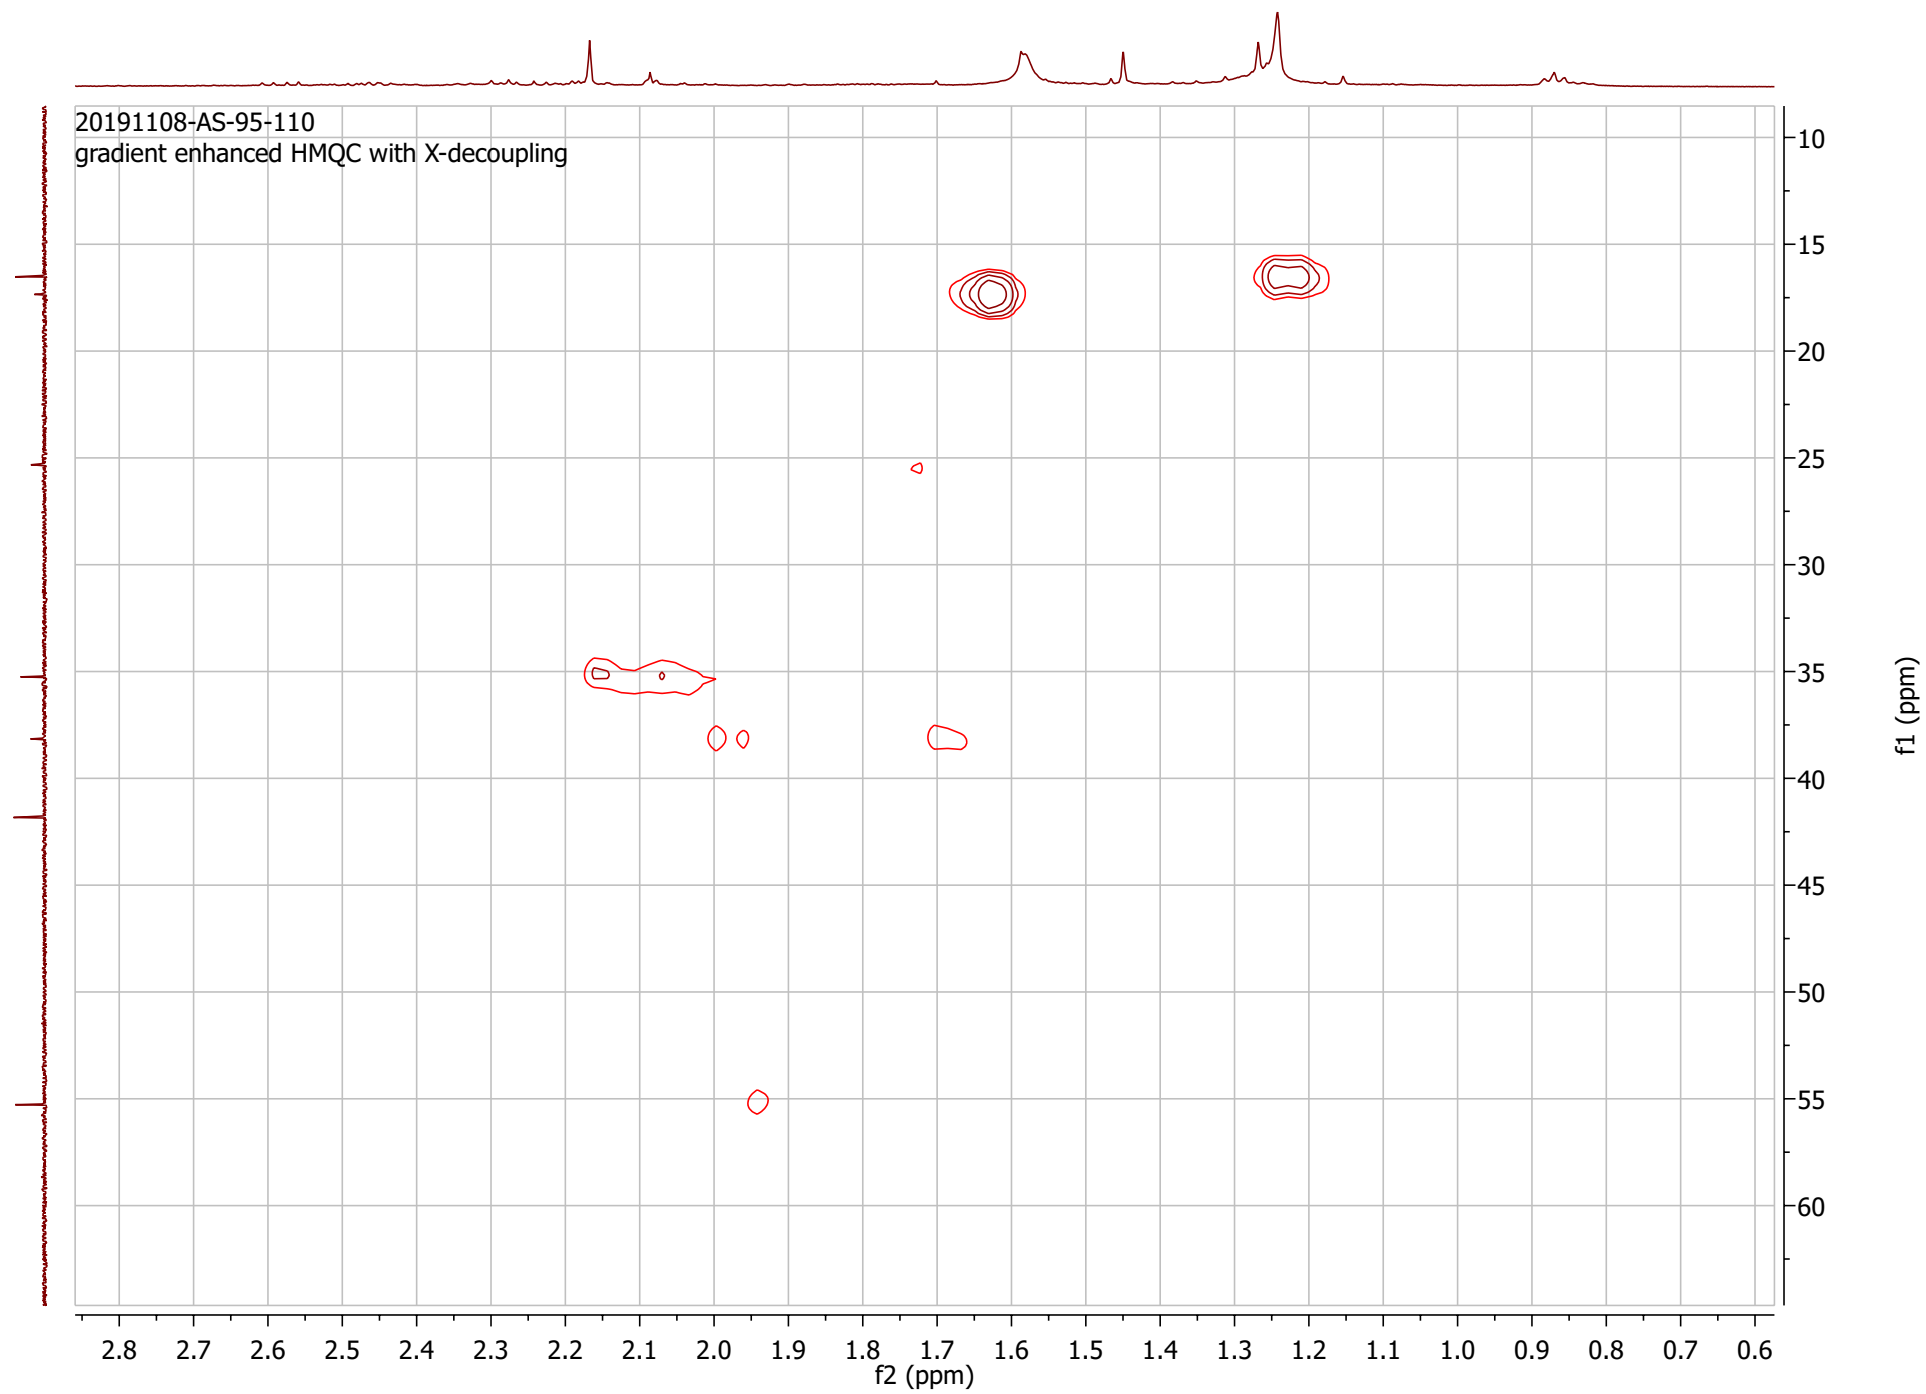

20191108-AS-95-110  
gradient enhanced HMQC with X-decoupling

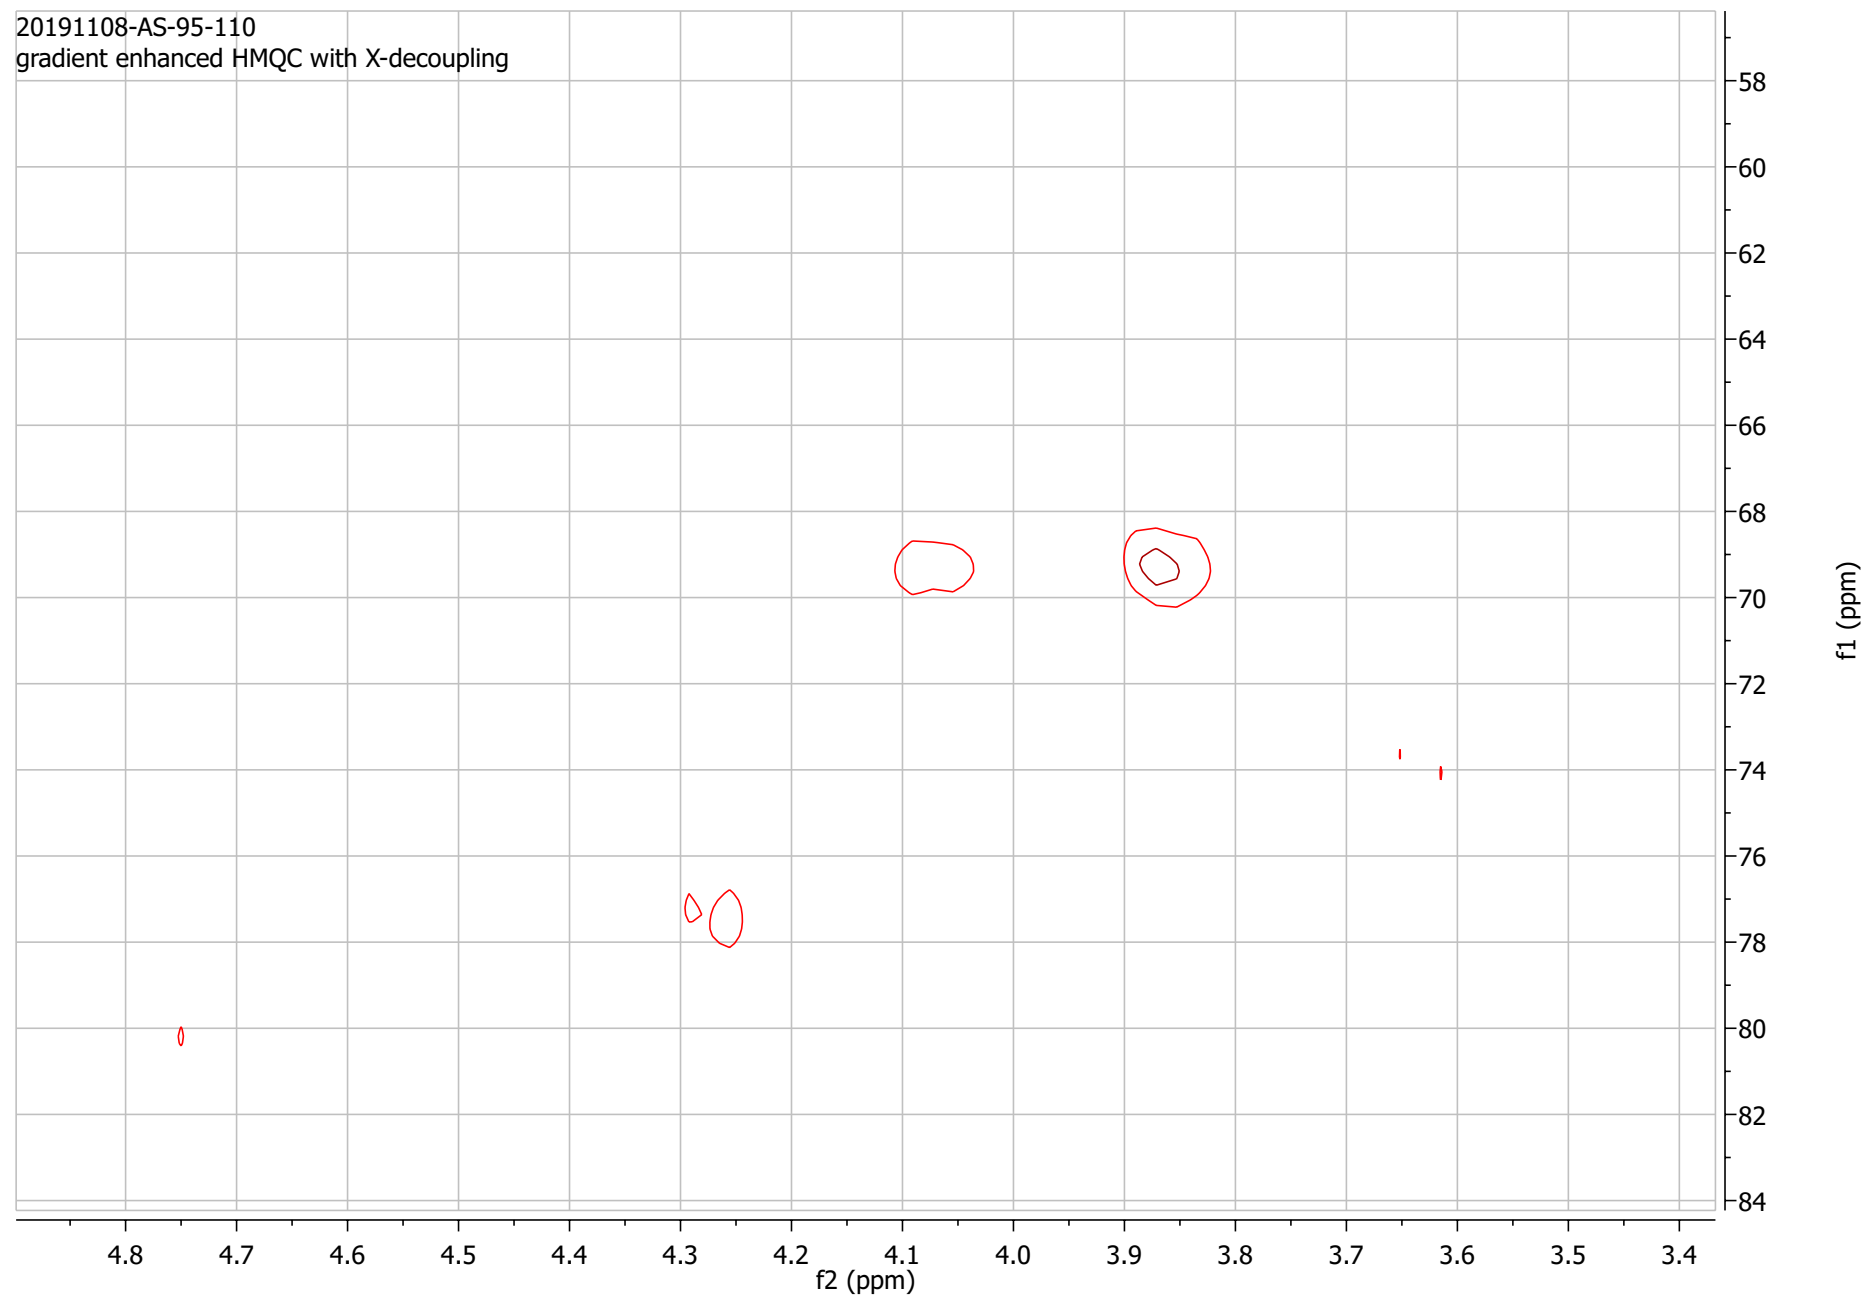

20191108-AS-95-110  
gradient enhanced HMBC

Compound-7 HMBC

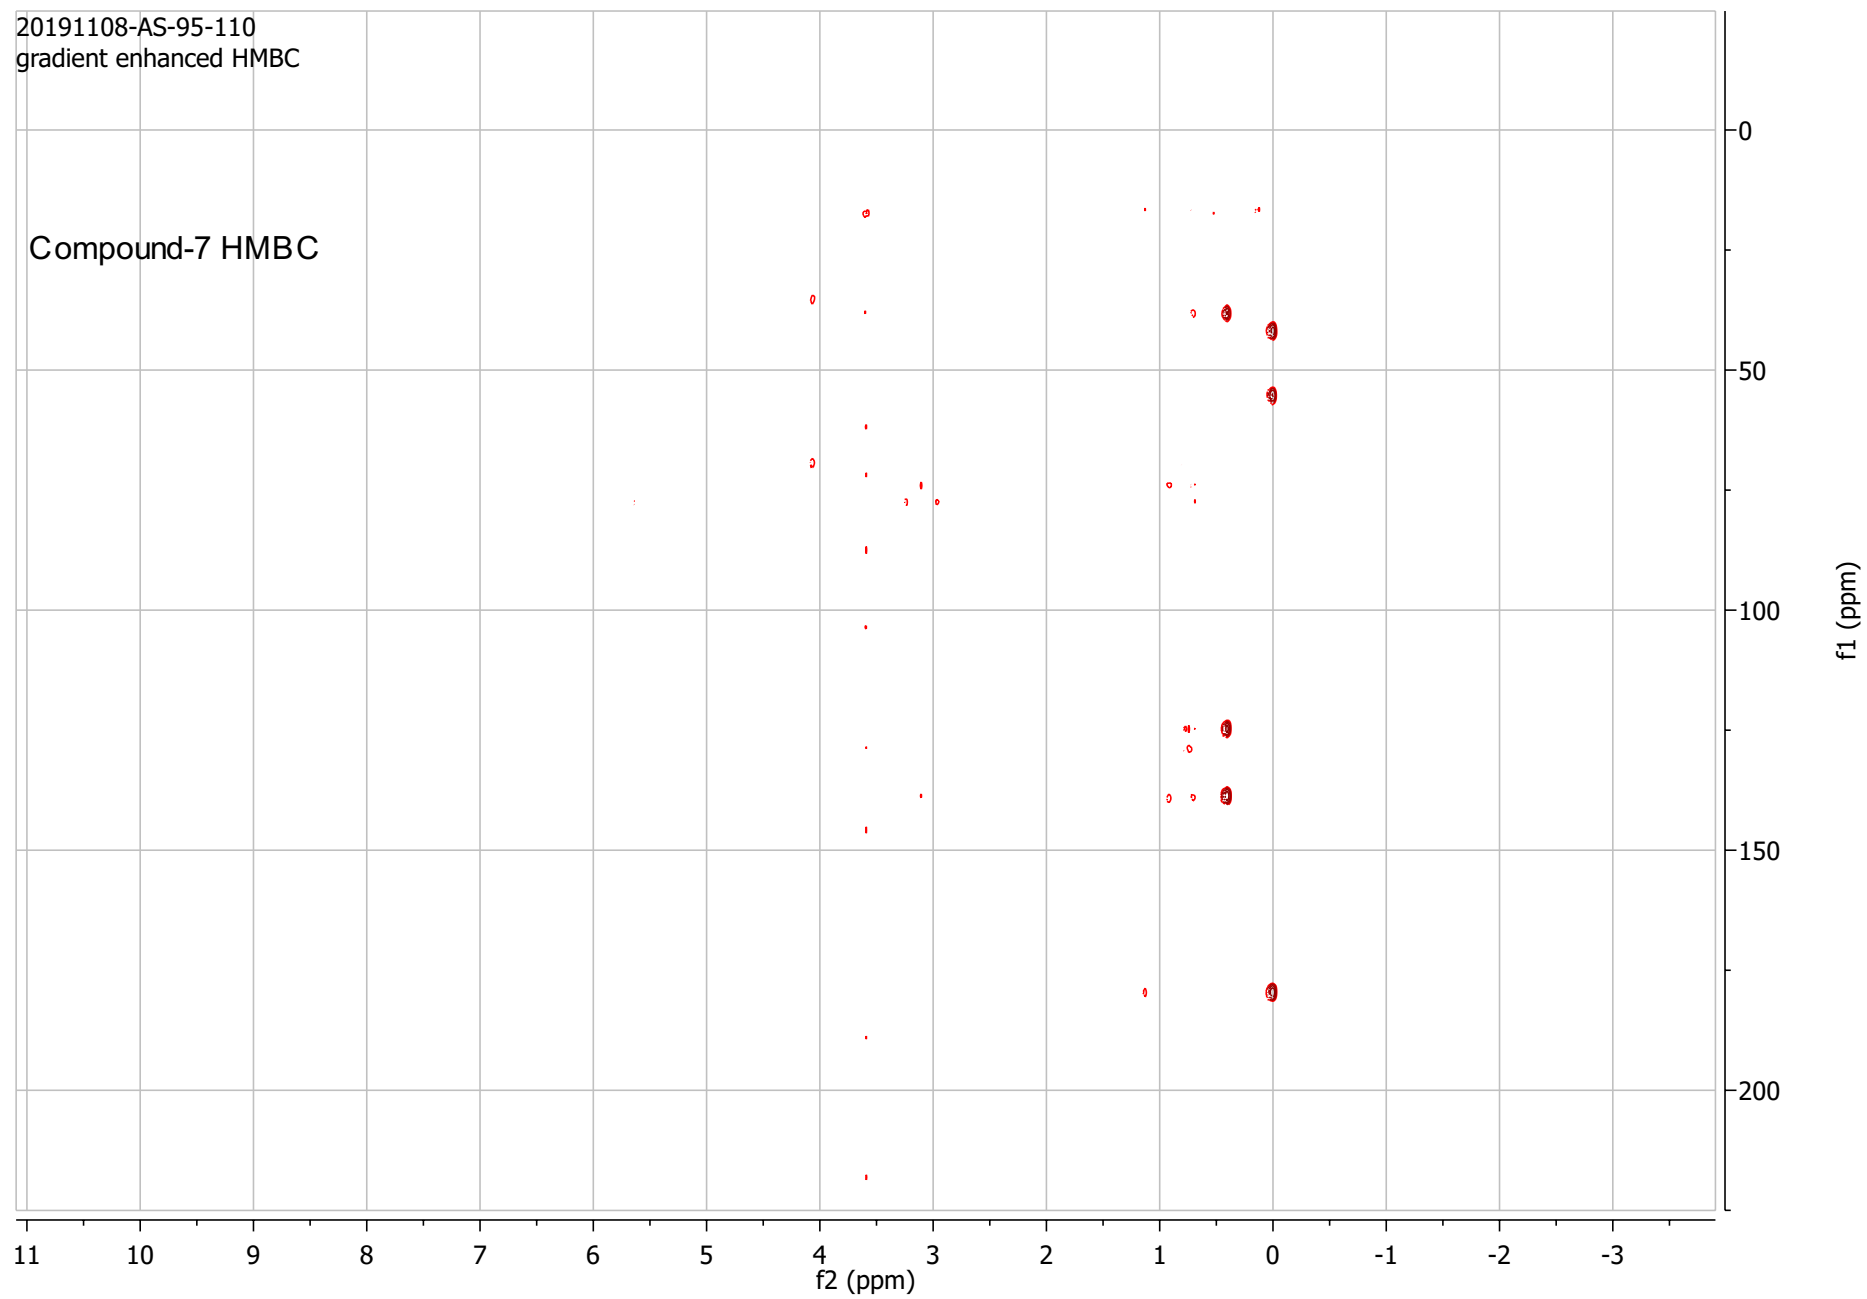

20191108-AS-95-110

gradient absolute value DQF Cosy

Compound -7-cosy

f1 (ppm)

f2 (ppm)

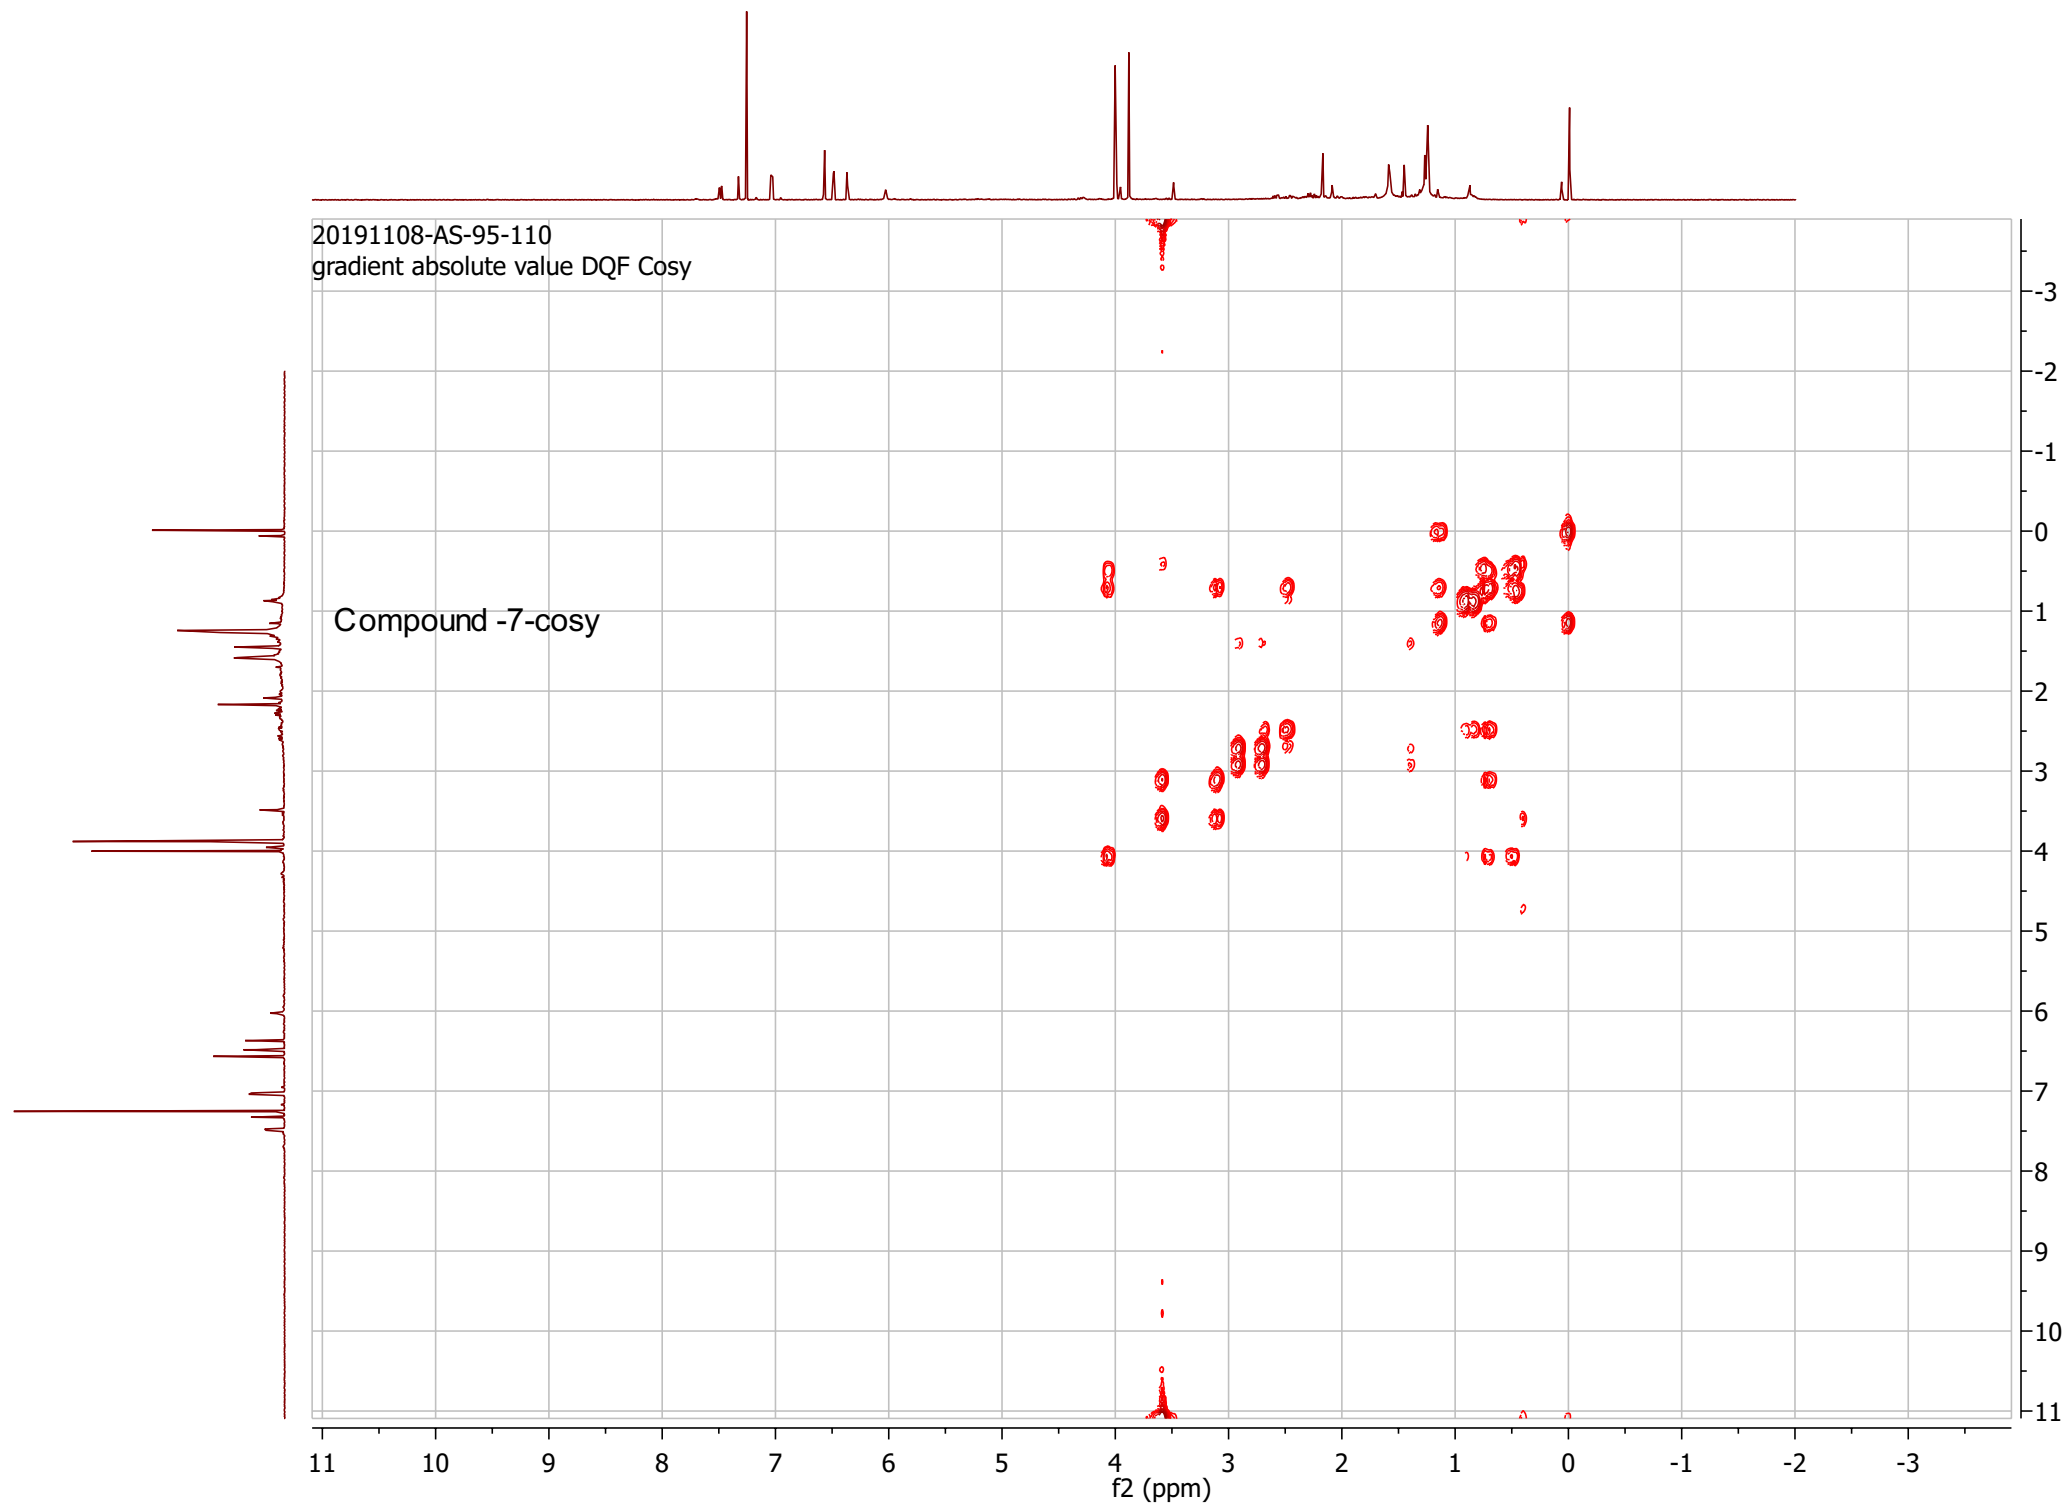

Supplement: f1 [file 5547013.f1.pdf]
